# Supplementary material for: Highly efficient construction of spirocyclic chromanone–pyrrolidines via Cu(i)/TF–BiphamPhos-catalyzed asymmetric 1,3-dipolar cycloaddition
Source: Royal Society of Chemistry journal article supplement (doi:10.1039/c1cc13554f), 2011-01-01
Supplement: c1cc13554f.pdf [file c1cc13554f.pdf]

*Supporting Information for*

**Highly efficient construction of spirocyclic chromanone-pyrrolidines  
via Cu(I)/TF-BiphamPhos-catalyzed asymmetric 1,3-dipolar  
cycloaddition**

Tang-Lin Liu, Zhao-Lin He, and Chun-Jiang Wang\*

E-mail: cjwang@whu.edu.cn

Table of Contents

|      |                                                                                                                                  |        |
|------|----------------------------------------------------------------------------------------------------------------------------------|--------|
| I.   | General Remarks                                                                                                                  | 2      |
| II.  | General Procedure for Asymmetric 1,3-Dipolar Cycloaddition of Azomethine<br>Ylides with ( <i>E</i> )-3-Alkylidene chroman-4-ones | 2-17   |
| III. | X-ray Crystal Structures of (2' <i>R</i> ,3 <i>R</i> ,4' <i>R</i> ,5' <i>R</i> )- <b>3aa</b>                                     | 17     |
| IV.  | References                                                                                                                       | 18     |
| V.   | <sup>1</sup> H NMR and <sup>13</sup> C NMR Spectra                                                                               | 19-60  |
| VI.  | HPLC Chromatograms                                                                                                               | 61-102 |

## General Remarks.

$^1\text{H}$  NMR spectra were recorded on a VARIAN Mercury 300 MHz spectrometer in chloroform-*d*. Chemical shifts are reported in ppm with the internal TMS signal at 0.0 ppm as a standard. The data are reported as (s = single, d = double, t = triple, q = quartet, m = multiple or unresolved, brs = broad single, coupling constant(s) in Hz, integration).  $^{13}\text{C}$  NMR spectra were recorded on a VARIAN Mercury 75 MHz spectrometer in chloroform-*d*. Chemical shifts are reported in ppm with the internal chloroform signal at 77.0 ppm as a standard. Commercially obtained reagents were used without further purification. All reactions were monitored by TLC with silica gel-coated plates. Diastereomeric ratios were determined from crude  $^1\text{H}$  NMR or HPLC analysis. Enantiomeric excesses were determined by HPLC, using a chiralcel AD-H column, a chirapak AS-H column with hexane and *i*-PrOH as solvents. Ligands **L1** and **L2** were prepared according to the literature procedure reported by us.<sup>[1]</sup> (*E*)-3-Alkylidene chroman-4-ones were prepared according to the literature procedure.<sup>[2]</sup> The racemic adducts were attained by using AgOAc/(±)-TF-BiphamPhos as the catalyst. The absolute (2'*R*,3*R*,4'*R*,5'*R*)-**3aa** achieved by AgOAc/(*S*)-TF-BiphamPhos was determined unequivocally according to the X-ray diffraction analysis, and those of other adducts were deduced on the basis of these results.

## General Procedure for racemic 1,3-Dipolar Cycloaddition of Azomethine Ylides with (*E*)-3-Alkylidene chroman-4-ones Catalyzed by AgOAc/(±)-TF-BiphamPhos Complex.

Under argon atmosphere, (±)-TF-BiphamPhos (4.6 mg, 0.0072 mmol) and AgOAc (1.0 mg, 0.006 mmol) were dissolved in 2 mL DCM, and stirred at room temperature for about 1h. Then, imine substrate (0.4 mmol), Et<sub>3</sub>N (0.03 mmol) and (*E*)-3-alkylidene chroman-4-ones (0.2 mmol) were added sequentially. Once starting material was consumed (monitored by TLC), the organic solvent was removed and the residue was purified by column chromatography to give the cycloadduct, which was used as the racemic sample for the chiral HPLC analysis.

**General Procedure for Asymmetric 1,3-Dipolar Cycloaddition of Azomethine Ylides with (*E*)-3-Alkylidene chroman-4-ones Catalyzed by AgOAc/(*S*)-TF-BiphamPhos Complex.**

Under argon atmosphere (*S*)-TF-BiphamPhos **L5** (5.8 mg, 0.0072 mmol) and Cu(CH<sub>3</sub>CN)<sub>4</sub>BF<sub>4</sub> (2.0 mg, 0.006 mmol) were dissolved in 2 mL DCM, and stirred at room temperature for about 1h. Then, imine substrate (0.4 mmol), Et<sub>3</sub>N (0.03 mmol) and (*E*)-3-alkylidene chroman-4-ones (0.2 mmol) were added sequentially. Once starting material was consumed (monitored by TLC), the mixture was filtered through celite and the filtrate was concentrated to dryness. The product purified by column chromatography to give the corresponding cycloaddition product, which was then directly analyzed by chiral HPLC to determine the enantiomeric excess.

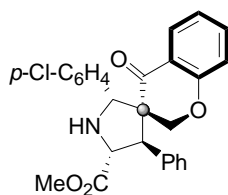

**(3aa)**

**(2'*R*,3*R*,4'*R*,5'*R*)-methyl 2'-(4-chlorophenyl)-4-oxo-4'-phenylspiro[chroman-3,3'-pyrrolidine]-5'-carboxylate**

The title compound was prepared according to the general procedure as described above in 85% yield. m.p. 60-62 °C; [ $\alpha$ ]<sub>D</sub><sup>25</sup> = +91.3 (*c* 1.08, CHCl<sub>3</sub>); <sup>1</sup>H NMR (CDCl<sub>3</sub>, TMS, 300 MHz)  $\delta$  7.46 (d, *J* = 8.1 Hz, 1H), 7.32-7.26 (m, 6H), 7.10 (d, *J* = 8.7 Hz, 2H), 6.97 (d, *J* = 8.1 Hz, 2H), 6.78 (t, *J* = 7.5 Hz, 1H), 6.66 (d, *J* = 8.7 Hz, 1H), 4.84 (s, 1H), 4.53 (d, *J* = 8.1 Hz, 1H), 4.38 (d, *J* = 8.4 Hz, 1H), 4.16 (d, *J* = 12.0 Hz, 1H), 3.84 (d, *J* = 11.7 Hz, 1H), 3.78 (s, 3H); <sup>13</sup>C NMR (CDCl<sub>3</sub>, TMS, 75 MHz)  $\delta$  192.59, 173.49, 160.42, 136.97, 136.35, 135.84, 133.67, 129.34, 128.95, 128.74, 127.99, 127.86, 127.38, 121.43, 121.26, 117.17, 73.26, 69.79, 59.66, 53.63, 52.71, 51.93; IR (KBr)  $\nu$  3677, 3622, 3019, 2977, 2400, 1734, 1606, 1520, 1477, 1415, 1216, 1046, 928, 757, 669 cm<sup>-1</sup>. The product was analyzed by HPLC to determine the enantiomeric excess: 91% ee (Chiralcel AS-H, *i*-propanol/hexane = 10/90, flow rate

1.0 mL/min,  $\lambda = 220$  nm);  $t_r = 21.75$  and 38.18 min.

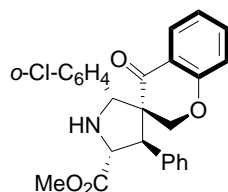

**(3ba)**

**(2'*R*,3*R*,4'*R*,5'*R*)-methyl 2'-(2-chlorophenyl)-4-oxo-4'-phenylspiro[chroman-3,3'-pyrrolidine]-5'-carboxylate**

The title compound was prepared according to the general procedure as described above in 81% yield. m.p. 99-100 °C;  $[\alpha]_D^{25} = +33.8$  ( $c$  1.24,  $\text{CHCl}_3$ );  $^1\text{H}$  NMR ( $\text{CDCl}_3$ , TMS, 300 MHz)  $\delta$  7.53 (d,  $J = 7.5$  Hz, 1H), 7.37-7.19 (m, 7H), 7.07-6.93 (m, 3H), 6.75 (d,  $J = 7.5$  Hz, 1H), 6.63 (d,  $J = 8.4$  Hz, 1H), 5.51 (s, 1H), 4.52 (d,  $J = 7.5$  Hz, 1H), 4.42 (d,  $J = 7.5$  Hz, 1H), 4.18 (d,  $J = 12.0$  Hz, 1H), 3.87 (d,  $J = 12.0$  Hz, 1H), 3.80 (s, 3H);  $^{13}\text{C}$  NMR ( $\text{CDCl}_3$ , TMS, 75 MHz)  $\delta$  192.83, 173.21, 160.67, 136.55, 135.49, 133.83, 129.05, 128.62, 127.65, 126.81, 126.37, 120.89, 117.06, 72.41, 64.87, 64.50, 59.50, 52.50; IR (KBr)  $\nu$  3678, 3621, 3020, 2978, 2400, 1733, 1606, 1521, 1478, 1416, 1217, 1046, 928, 757, 669  $\text{cm}^{-1}$ . The product was analyzed by HPLC to determine the enantiomeric excess: 89% ee (Chiralcel AD-H, *i*-propanol/hexane = 30/70, flow rate 1.0 mL/min,  $\lambda = 220$  nm);  $t_r = 11.94$  and 23.73 min.

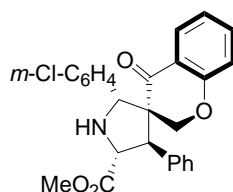

**(3ca)**

**(2'*R*,3*R*,4'*R*,5'*R*)-methyl 2'-(3-chlorophenyl)-4-oxo-4'-phenylspiro[chroman-3,3'-pyrrolidine]-5'-carboxylate**

The title compound was prepared according to the general procedure as described above in 87% yield. m.p. 56-58 °C;  $[\alpha]_D^{25} = +92.3$  ( $c$  0.73,  $\text{CHCl}_3$ );  $^1\text{H}$  NMR ( $\text{CDCl}_3$ , TMS, 300 MHz)  $\delta$  7.48 (dd,  $J = 1.5$  Hz, 8.1 Hz, 1H), 7.32-7.23 (m, 7H), 7.12-7.07 (m,



2H), 6.96-6.94 (m, 2H), 6.77 (d,  $J = 7.5$  Hz, 1H), 6.68 (d,  $J = 8.4$  Hz, 1H), 4.81 (s, 1H), 4.54 (d,  $J = 8.1$  Hz, 1H), 4.38 (d,  $J = 8.4$  Hz, 1H), 4.16 (d,  $J = 11.7$  Hz, 1H), 3.83 (d,  $J = 11.7$  Hz, 1H), 3.79 (s, 3H);  $^{13}\text{C}$  NMR ( $\text{CDCl}_3$ , TMS, 75 MHz)  $\delta$  192.25, 173.11, 160.15, 140.12, 136.12, 135.65, 133.49, 128.93, 128.73, 128.50, 128.30, 127.81, 127.65, 127.11, 125.71, 121.17, 116.92, 72.96, 69.79, 64.13, 59.37, 52.51, 51.53; IR (KBr)  $\nu$  3680, 3619, 3018, 2978, 2399, 1734, 1606, 1521, 1478, 1416, 1216, 1047, 928, 757, 669  $\text{cm}^{-1}$ . The product was analyzed by HPLC to determine the enantiomeric excess: 89% ee (Chiralcel AD-H, *i*-propanol/hexane = 30/70, flow rate 1.0 mL/min,  $\lambda = 220$  nm);  $t_r = 11.23$  and 23.05 min.

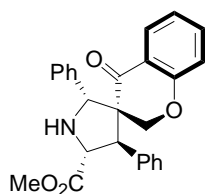

**(3da)**

**(2'*R*,3*R*,4'*R*,5'*R*)-methyl 4-oxo-2',4'-diphenylspiro[chroman-3,3'-pyrrolidine]-5'-carboxylate**

The title compound was prepared according to the general procedure as described above in 85% yield. m.p. 128-130 °C;  $[\alpha]_D^{25} = +119.0$  ( $c$  1.15,  $\text{CHCl}_3$ );  $^1\text{H}$  NMR ( $\text{CDCl}_3$ , TMS, 300 MHz)  $\delta$  7.44 (d,  $J = 7.5$  Hz, 1H), 7.34-7.14 (m, 8H), 7.00-6.99 (m, 3H), 6.74-6.62 (m, 2H), 4.85 (s, 1H), 4.54 (d,  $J = 8.1$  Hz, 1H), 4.37 (d,  $J = 8.1$  Hz, 1H), 4.18 (d,  $J = 12.0$  Hz, 1H), 3.83 (d,  $J = 11.4$  Hz, 1H), 3.78 (s, 3H), 2.90 (brs, 1H);  $^{13}\text{C}$  NMR ( $\text{CDCl}_3$ , TMS, 75 MHz)  $\delta$  192.74, 173.34, 160.30, 137.89, 136.43, 135.37, 138.71, 128.56, 127.79, 127.71, 127.59, 127.13, 121.17, 120.96, 16.94, 76.32, 73.21, 70.76, 64.34, 59.60, 52.50, 52.26; IR (KBr)  $\nu$  3682, 3625, 3020, 2980, 2400, 1735, 1610, 1518, 1476, 1420, 1223, 1046, 928, 757, 669  $\text{cm}^{-1}$ . The product was analyzed by HPLC to determine the enantiomeric excess: 90% ee (Chiralcel AD-H, *i*-propanol/hexane = 30/70, flow rate 1.0 mL/min,  $\lambda = 220$  nm);  $t_r = 16.76$  and 49.71 min.

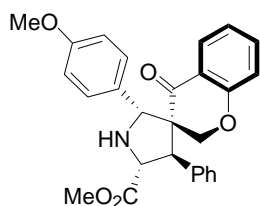

**(3ea)**

**(2'*R*,3*R*,4'*R*,5'*R*)-methyl 2'-(4-methoxyphenyl)-4-oxo-4'-phenylspiro[chroman-3,3'-pyrrolidine]-5'-carboxylate**

The title compound was prepared according to the general procedure as described above in 90% yield. m.p. 59-61 °C;  $[\alpha]_D^{25} = +132.9$  (*c* 1.04, CHCl<sub>3</sub>); <sup>1</sup>H NMR (CDCl<sub>3</sub>, TMS, 300 MHz) δ 7.49 (d, *J* = 7.8 Hz, 1H), 7.36-7.23 (m, 8H), 7.09 (d, *J* = 8.1 Hz, 1H), 6.77 (d, *J* = 7.5 Hz, 1H), 6.68 (d, *J* = 8.1 Hz, 1H), 6.56 (d, *J* = 8.1 Hz, 1H), 4.85 (s, 1H), 4.55 (d, *J* = 8.7 Hz, 1H), 4.38 (d, *J* = 8.4 Hz, 1H), 4.20 (d, *J* = 11.4 Hz, 1H), 3.89 (d, *J* = 12.9 Hz, 1H), 3.80 (s, 3H), 3.67 (s, 3H), 2.85 (brs, 1H); <sup>13</sup>C NMR (CDCl<sub>3</sub>, TMS, 75 MHz) δ 192.44, 172.95, 159.83, 158.55, 135.99, 134.91, 129.51, 128.46, 128.24, 128.12, 126.71, 120.76, 120.54, 116.49, 112.64, 72.74, 69.68, 63.71, 58.97, 54.69, 52.04, 51.73; IR (KBr) ν 3682, 3621, 3020, 2976, 2400, 1736, 1688, 1606, 1523, 1478, 1425, 1216, 1047, 929, 758, 669 cm<sup>-1</sup>. The product was analyzed by HPLC to determine the enantiomeric excess: 94% ee (Chiralcel AD-H, *i*-propanol/hexane = 30/70, flow rate 1.0 mL/min, λ = 220 nm); *t*<sub>r</sub> = 26.92 and 60.81 min.

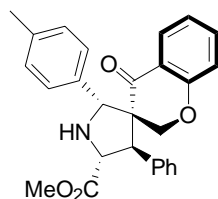

**(3fa)**

**(2'*R*,3*R*,4'*R*,5'*R*)-methyl 4-oxo-4'-phenyl-2'-*p*-tolylspiro[chroman-3,3'-pyrrolidine]-5'-carboxylate**

The title compound was prepared according to the general procedure as described above in 86% yield. m.p. 137-140 °C;  $[\alpha]_D^{25} = +129.9$  (*c* 1.44, CHCl<sub>3</sub>); <sup>1</sup>H NMR (CDCl<sub>3</sub>, TMS, 300 MHz) δ 7.44 (d, *J* = 8.1 Hz, 1H), 7.32-7.20 (m, 6H), 7.01 (d, *J* =

7.8 Hz, 2H), 6.81 (d,  $J = 7.8$  Hz, 2H), 6.73 (d,  $J = 7.5$  Hz, 1H), 6.65 (d,  $J = 8.1$  Hz, 1H), 4.83 (s, 1H), 4.52 (d,  $J = 8.7$  Hz, 1H), 4.37 (d,  $J = 8.4$  Hz, 1H), 4.19 (d,  $J = 12.0$  Hz, 1H), 3.83 (d,  $J = 12.0$  Hz, 1H), 3.77 (s, 3H), 2.13 (s, 3H);  $^{13}\text{C}$  NMR ( $\text{CDCl}_3$ , TMS, 75 MHz)  $\delta$  192.18, 173.32, 160.23, 137.36, 136.33, 135.20, 134.80, 128.59, 128.50, 128.30, 127.52, 127.09, 121.14, 120.83, 116.87, 73.01, 70.28, 64.13, 53.37, 52.40, 52.16, 20.82; IR (KBr)  $\nu$  3683, 3620, 3020, 2979, 2399, 1735, 1607, 1523, 1479, 1416, 1219, 1047, 929, 758, 669  $\text{cm}^{-1}$ . The product was analyzed by HPLC to determine the enantiomeric excess: 89% ee (Chiralcel AD-H, *i*-propanol/hexane = 30/70, flow rate 1.0 mL/min,  $\lambda = 220$  nm);  $t_r = 11.37$  and 44.17 min.

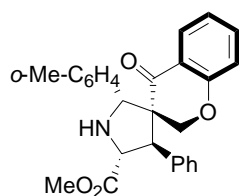

**(3ga)**

**(2'*R*,3*R*,4'*R*,5'*R*)-methyl 4-oxo-4'-phenyl-2'-*o*-tolylspiro[chroman-3,3'-pyrrolidine]-5'-carboxylate**

The title compound was prepared according to the general procedure as described above in 95% yield. m.p. 131-134 °C;  $[\alpha]_D^{25} = +64.2$  ( $c$  1.28,  $\text{CHCl}_3$ );  $^1\text{H}$  NMR ( $\text{CDCl}_3$ , TMS, 300 MHz)  $\delta$  7.46 (d,  $J = 7.8$  Hz, 1H), 7.36-7.26 (m, 4H), 7.20-7.15 (m, 2H), 6.94 (d,  $J = 7.2$  Hz, 1H), 6.87 (t,  $J = 7.2$  Hz, 1H), 6.79 (t,  $J = 7.5$  Hz, 1H), 6.71 (t,  $J = 7.5$  Hz, 1H), 6.60 (d,  $J = 8.4$  Hz, 1H), 5.16 (s, 1H), 4.59 (d,  $J = 8.4$  Hz, 1H), 4.37 (d,  $J = 8.4$  Hz, 1H), 4.13 (d,  $J = 12.0$  Hz, 1H), 3.81 (d,  $J = 12.0$  Hz, 1H), 3.78 (s, 3H), 2.81 (brs, 1H), 2.26 (s, 3H);  $^{13}\text{C}$  NMR ( $\text{CDCl}_3$ , TMS, 75 MHz)  $\delta$  173.05, 160.19, 136.49, 136.30, 135.23, 130.08, 128.74, 128.52, 127.62, 127.41, 127.22, 127.09, 125.78, 121.00, 116.63, 73.30, 65.72, 64.32, 59.89, 53.07, 52.52, 19.33; IR (KBr)  $\nu$  3680, 3619, 3019, 2977, 2400, 1735, 1609, 1524, 1478, 1415, 1216, 1046, 928, 757, 669  $\text{cm}^{-1}$ . The product was analyzed by HPLC to determine the enantiomeric excess: 89% ee (Chiralcel AD-H, *i*-propanol/hexane = 30/70, flow rate 1.0 mL/min,  $\lambda = 220$  nm);  $t_r = 10.51$  and 12.82 min.

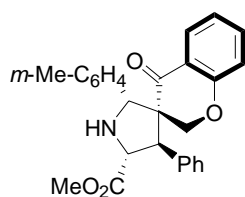

**(3ha)**

**(2'R,3R,4'R,5'R)-methyl 4-oxo-4'-phenyl-2'-*m*-tolylspiro[chroman-3,3'-pyrrolidine]-5'-carboxylate**

The title compound was prepared according to the general procedure as described above in 94% yield. m.p. 141-144 °C;  $[\alpha]_D^{25} = +103.7$  (*c* 1.46, CHCl<sub>3</sub>); <sup>1</sup>H NMR (CDCl<sub>3</sub>, TMS, 300 MHz) δ 7.43 (dd, *J* = 1.8 Hz, 8.1 Hz, 1H), 7.33-7.19 (m, 6H), 6.99-6.88 (m, 3H), 6.78 (d, *J* = 7.5 Hz, 1H), 6.72 (t, *J* = 7.5 Hz, 1H), 6.64 (d, *J* = 8.7 Hz, 1H), 4.81 (s, 1H), 4.53 (d, *J* = 8.7 Hz, 1H), 4.37 (d, *J* = 8.1 Hz, 1H), 4.17 (d, *J* = 12.0 Hz, 1H), 3.81 (d, *J* = 12.0 Hz, 1H), 3.77 (s, 3H), 2.89 (brs, 1H), 2.08 (s, 3H); <sup>13</sup>C NMR (CDCl<sub>3</sub>, TMS, 75 MHz) δ 192.56, 173.16, 160.24, 137.60, 137.14, 136.36, 135.18, 128.61, 128.54, 128.39, 127.60, 127.50, 127.04, 124.69, 121.25, 120.80, 116.75, 73.07, 70.66, 64.19, 59.57, 52.38, 52.11, 21.00; IR (KBr) ν 3679, 3619, 3021, 2978, 2401, 1735, 1606, 1520, 1477, 1415, 1217, 1046, 928, 758, 669 cm<sup>-1</sup>. The product was analyzed by HPLC to determine the enantiomeric excess: 89% ee (Chiralcel AD-H, *i*-propanol/hexane = 30/70, flow rate 1.0 mL/min, λ = 220 nm); *t*<sub>r</sub> = 9.83 and 21.72 min.

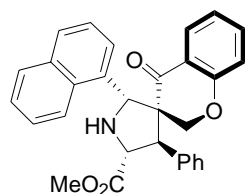

**(3ia)**

**(2'R,3R,4'R,5'R)-methyl 2'-(naphthalen-1-yl)-4-oxo-4'-phenylspiro[chroman-3,3'-pyrrolidine]-5'-carboxylate**

The title compound was prepared according to the general procedure as described above in 93% yield. m.p. 178-181 °C;  $[\alpha]_D^{25} = -68.4$  (*c* 1.82, CHCl<sub>3</sub>); <sup>1</sup>H NMR

(CDCl<sub>3</sub>, TMS, 300 MHz)  $\delta$  8.03 (d,  $J$  = 8.7 Hz, 1H), 7.56-7.43 (m, 3H), 7.36-7.15 (m, 8H), 7.07 (d,  $J$  = 8.1 Hz, 1H), 6.81 (d,  $J$  = 7.5 Hz, 1H), 6.37 (t,  $J$  = 7.5 Hz, 1H), 6.19 (d,  $J$  = 8.1 Hz, 1H), 5.76 (s, 1H), 4.65 (d,  $J$  = 9.3 Hz, 1H), 4.41 (d,  $J$  = 8.7 Hz, 1H), 4.29 (d,  $J$  = 11.7 Hz, 1H), 3.73 (d,  $J$  = 12.0 Hz, 1H), 3.66 (s, 3H), 2.84 (brs, 1H); <sup>13</sup>C NMR (CDCl<sub>3</sub>, TMS, 75 MHz)  $\delta$  192.11, 173.16, 160.02, 135.87, 134.67, 134.56, 133.14, 130.94, 128.59, 128.17, 127.52, 126.55, 125.80, 125.26, 124.95, 124.81, 122.75, 120.84, 120.61, 116.41, 73.82, 63.61, 63.46, 60.21, 52.38, 51.76; IR (KBr)  $\nu$  3683, 3621, 3019, 2980, 2400, 1736, 1686, 1606, 1517, 1478, 1425, 1215, 1040, 928, 758, 669 cm<sup>-1</sup>. The product was analyzed by HPLC to determine the enantiomeric excess: 90% ee (Chiralcel AD-H, *i*-propanol/hexane = 30/70, flow rate 1.0 mL/min,  $\lambda$  = 220 nm);  $t_r$  = 20.91 and 40.67 min.

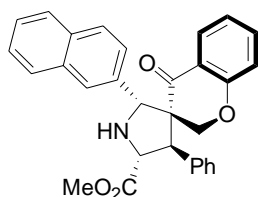

**(3ja)**

**(2'*R*,3*R*,4'*R*,5'*R*)-methyl 2'-(naphthalen-2-yl)-4-oxo-4'-phenylspiro[chroman-3,3'-pyrrolidine]-5'-carboxylate**

The title compound was prepared according to the general procedure as described above in 83% yield. m.p. 107-110 °C;  $[\alpha]_D^{25} = +73.4$  ( $c$  1.21, CHCl<sub>3</sub>); <sup>1</sup>H NMR (CDCl<sub>3</sub>, TMS, 300 MHz)  $\delta$  7.64-7.61 (m, 3H), 7.53 (d,  $J$  = 15.4 Hz, 1H), 7.39-7.29 (m, 9H), 7.10 (t,  $J$  = 8.1 Hz, 1H), 6.63 (d,  $J$  = 8.1 Hz, 1H), 6.57 (d,  $J$  = 7.5 Hz, 1H), 5.06 (s, 1H), 4.68 (d,  $J$  = 8.7 Hz, 1H), 4.66 (d,  $J$  = 8.7 Hz, 1H), 4.29 (d,  $J$  = 12.0 Hz, 1H), 3.90 (d,  $J$  = 12.0 Hz, 1H), 3.84 (s, 3H), 2.95 (brs, 1H); <sup>13</sup>C NMR (CDCl<sub>3</sub>, TMS, 75 MHz)  $\delta$  188.80, 168.84, 155.69, 131.81, 128.34, 128.10, 124.25, 124.13, 123.34, 123.13, 122.93, 122.75, 122.54, 121.28, 120.95, 116.66, 116.42, 112.31, 68.57, 66.01, 59.74, 55.27, 48.07, 47.51; IR (KBr)  $\nu$  3681, 3620, 3020, 2979, 2400, 1737, 1680, 1616, 1514, 1478, 1425, 1216, 1046, 928, 759, 669 cm<sup>-1</sup>. The product was analyzed by HPLC to determine the enantiomeric excess: 86% ee (Chiralcel AD-H,

*i*-propanol/hexane = 30/70, flow rate 1.0 mL/min,  $\lambda$  = 220 nm);  $t_r$  = 21.06 and 57.83 min.

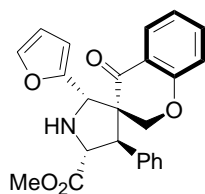

**(3ka)**

**(2'*R*,3*R*,4'*R*,5'*R*)-methyl 2'-(furan-2-yl)-4-oxo-4'-phenylspiro[chroman-3,3'-pyrrolidine]-5'-carboxylate**

The title compound was prepared according to the general procedure as described above in 86% yield. m.p. 69-72 °C;  $[\alpha]_D^{25} = +129.0$  (*c* 1.15, CHCl<sub>3</sub>); <sup>1</sup>H NMR (CDCl<sub>3</sub>, TMS, 300 MHz)  $\delta$  7.67 (dd, *J* = 1.5 Hz, 7.8 Hz, 1H), 7.35-7.27 (m, 6H), 7.04 (d, *J* = 1.6 Hz, 1H), 6.86 (d, *J* = 6.6 Hz, 1H), 6.76 (d, *J* = 8.4 Hz, 1H), 6.11 (d, *J* = 3.0 Hz, 1H), 6.02-6.01 (m, 1H), 4.89 (s, 1H), 4.52 (d, *J* = 7.5 Hz, 1H), 4.32 (d, *J* = 8.1 Hz, 1H), 4.20 (d, *J* = 12.0 Hz, 1H), 3.85 (d, *J* = 12.0 Hz, 1H), 3.76 (s, 3H), 3.06 (brs, 1H); <sup>13</sup>C NMR (CDCl<sub>3</sub>, TMS, 75 MHz)  $\delta$  192.00, 173.15, 160.57, 150.72, 141.90, 136.41, 135.51, 128.71, 128.58, 127.62, 127.30, 121.13, 120.59, 117.14, 110.04, 108.59, 72.33, 64.39, 63.42, 58.83, 52.55, 51.78; IR (KBr)  $\nu$  3680, 3621, 3019, 2981, 2400, 1737, 1687, 1609, 1513, 1478, 1425, 1214, 1040, 928, 758, 669 cm<sup>-1</sup>. The product was analyzed by HPLC to determine the enantiomeric excess: 90% ee (Chiralcel AD-H, *i*-propanol/hexane = 30/70, flow rate 1.0 mL/min,  $\lambda$  = 220 nm);  $t_r$  = 13.61 and 57.64 min.

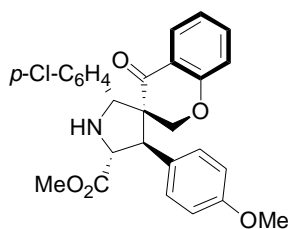

**(3ab)**

**(2'*R*,3*R*,4'*R*,5'*R*)-methyl 2'-(4-chlorophenyl)-4'-(4-methoxyphenyl)-4-oxospiro-**

**[chroman-3,3'-pyrrolidine]-5'-carboxylate**

The title compound was prepared according to the general procedure as described above in 88% yield.  $[\alpha]_D^{25} = +58.4$  (*c* 1.40, CHCl<sub>3</sub>); <sup>1</sup>H NMR (CDCl<sub>3</sub>, TMS, 300 MHz)  $\delta$  7.45 (d, *J* = 7.5 Hz, 1H), 7.30-7.22 (m, 3H), 7.09 (d, *J* = 8.7 Hz, 2H), 6.97 (d, *J* = 8.1 Hz, 2H), 6.86 (d, *J* = 8.1 Hz, 2H), 6.78 (t, *J* = 7.2 Hz, 1H), 6.67 (d, *J* = 8.7 Hz, 1H), 4.82 (s, 1H), 4.49 (d, *J* = 7.2 Hz, 1H), 4.32 (d, *J* = 6.6 Hz, 1H), 4.19 (d, *J* = 12.0 Hz, 1H), 3.85 (d, *J* = 13.2 Hz, 1H), 3.78 (s, 3H); <sup>13</sup>C NMR (CDCl<sub>3</sub>, TMS, 75 MHz)  $\delta$  192.41, 173.29, 160.19, 158.89, 136.82, 135.60, 133.40, 130.86, 129.52, 129.06, 127.77, 127.12, 121.17, 121.04, 116.96, 114.01, 72.94, 69.37, 64.11, 59.46, 55.15, 52.50, 50.99; IR (KBr)  $\nu$  3680, 3621, 3019, 2979, 2400, 1735, 1685, 1606, 1517, 1478, 1426, 1215, 1044, 929, 758, 668 cm<sup>-1</sup>. The product was analyzed by HPLC to determine the enantiomeric excess: 92% ee (Chiralcel AD-H, *i*-propanol/hexane = 30/70, flow rate 1.0 mL/min,  $\lambda$  = 220 nm); *t*<sub>r</sub> = 22.85 and 39.31 min.

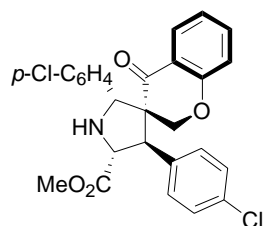

**(3ac)**

**(2'*R*,3*R*,4'*R*,5'*R*)-methyl 2',4'-bis(4-chlorophenyl)-4-oxospiro[chroman-3,3'-pyrrolidine]-5'-carboxylate**

The title compound was prepared according to the general procedure as described above in 95% yield. m.p. 60-62 °C;  $[\alpha]_D^{25} = +103.2$  (*c* 1.10, CHCl<sub>3</sub>); <sup>1</sup>H NMR (CDCl<sub>3</sub>, TMS, 300 MHz)  $\delta$  7.46 (d, *J* = 7.8 Hz, 1H), 7.28-7.22 (m, 5H), 7.09 (d, *J* = 8.1 Hz, 2H), 6.98 (d, *J* = 8.1 Hz, 2H), 6.86 (d, *J* = 8.1 Hz, 2H), 6.78 (m, 1H), 6.68 (d, *J* = 8.1 Hz, 1H), 4.82 (s, 1H), 4.49 (d, *J* = 8.4 Hz, 1H), 4.35 (m, 1H), 4.19 (d, *J* = 12.0 Hz, 1H), 3.85 (d, *J* = 11.7 Hz, 1H), 3.78 (s, 3H); <sup>13</sup>C NMR (CDCl<sub>3</sub>, TMS, 75 MHz)  $\delta$  191.93, 172.92, 160.20, 136.89, 135.76, 134.45, 133.57, 129.89, 129.12, 128.88, 127.85, 127.24, 121.35, 121.04, 117.00, 72.80, 69.12, 63.63, 52.10, 50.68, 29.84; IR (KBr)  $\nu$  3683, 3621, 302, 2980, 2400, 1736, 1606, 1517, 1478, 1425, 1215, 1040, 928,

758, 669  $\text{cm}^{-1}$ . The product was analyzed by HPLC to determine the enantiomeric excess: 94% ee (Chiralcel AS-H, *i*-propanol/hexane = 10/90, flow rate 1.0 mL/min,  $\lambda$  = 220 nm);  $t_r$  = 41.15 and 48.18 min.

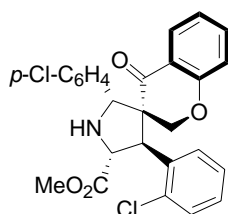

**(3ad)**

**(2'R,3R,4'R,5'R)-methyl 4'-(2-chlorophenyl)-2'-(4-chlorophenyl)-4-oxospiro-[chroman-3,3'-pyrrolidine]-5'-carboxylate**

The title compound was prepared according to the general procedure as described above in 87% yield. m.p. 146-148 °C;  $[\alpha]_D^{25} = +85.7$  (*c* 1.68,  $\text{CHCl}_3$ );  $^1\text{H}$  NMR ( $\text{CDCl}_3$ , TMS, 300 MHz)  $\delta$  7.62 (t,  $J$  = 11.1 Hz, 2H), 7.47 (t,  $J$  = 7.2 Hz, 2H), 7.29 (d,  $J$  = 7.2 Hz, 1H), 7.27-7.17 (m, 3H), 6.93 (t,  $J$  = 8.4 Hz, 1H), 6.78 (t,  $J$  = 7.5 Hz, 1H), 6.45 (d,  $J$  = 8.1 Hz, 1H), 4.93 (d,  $J$  = 4.5 Hz, 1H), 4.75 (d,  $J$  = 6.9 Hz, 1H), 4.23 (s, 1H), 4.12 (d,  $J$  = 11.7 Hz, 1H), 3.93 (s, 3H), 3.86 (d,  $J$  = 11.7 Hz, 1H), 3.08 (brs, 1H);  $^{13}\text{C}$  NMR ( $\text{CDCl}_3$ , TMS, 75 MHz)  $\delta$  193.69, 173.79, 160.35, 136.68, 135.74, 135.35, 134.81, 133.79, 130.24, 129.49, 129.10, 127.89, 127.25, 121.35, 120.84, 117.12, 73.00, 66.90, 58.39, 52.97, 49.70; IR (KBr)  $\nu$  3679, 3620, 3018, 2983, 2403, 1736, 1683, 1606, 1513 1473, 1425, 1215, 1040, 929, 758, 668  $\text{cm}^{-1}$ . The product was analyzed by HPLC to determine the enantiomeric excess: 92% ee (Chiralcel AS-H, *i*-propanol/hexane = 10/90, flow rate 1.0 mL/min,  $\lambda$  = 220 nm);  $t_r$  = 11.47 and 43.77 min.

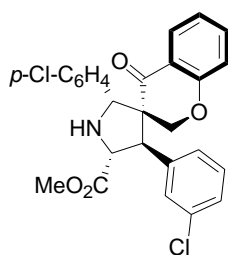

**(3ae)**



**(2'R,3R,4'R,5'R)-methyl 4'-(3-chlorophenyl)-2'-(4-chlorophenyl)-4-oxospiro-[chroman-3,3'-pyrrolidine]-5'-carboxylate**

The title compound was prepared according to the general procedure as described above in 88% yield. m.p. 66-68 °C;  $[\alpha]_D^{25} = +110.3$  (*c* 0.76, CHCl<sub>3</sub>); <sup>1</sup>H NMR (CDCl<sub>3</sub>, TMS, 300 MHz) δ 7.38 (d, *J* = 7.5 Hz, 1H), 7.24-7.02 (m, 5H), 7.01 (d, *J* = 8.1 Hz, 2H), 6.90 (d, *J* = 8.1 Hz, 2H), 6.72 (d, *J* = 7.5 Hz, 1H), 6.61 (t, *J* = 7.8 Hz, 1H), 4.76 (s, 1H), 4.50 (d, *J* = 8.1 Hz, 1H), 4.26 (d, *J* = 8.4 Hz, 1H), 4.13 (d, *J* = 12.0 Hz, 1H), 3.77 (d, *J* = 12.0 Hz, 1H), 3.75 (s, 3H); <sup>13</sup>C NMR (CDCl<sub>3</sub>, TMS, 75 MHz) δ 192.18, 173.06, 160.37, 138.39, 136.81, 135.98, 134.84, 133.77, 130.19, 129.34, 128.83, 128.03, 127.43, 126.96, 121.55, 121.15, 117.20, 73.00, 69.60, 63.98, 59.61, 52.81, 51.23; IR (KBr) ν 3680, 3620, 3020, 2981, 2400, 1735, 1685, 1605, 1515, 1477, 1425, 1215, 1039, 929, 759, 669 cm<sup>-1</sup>. The product was analyzed by HPLC to determine the enantiomeric excess: 91% ee (Chiralcel AS-H, *i*-propanol/hexane = 10/90, flow rate 1.0 mL/min, λ = 220 nm); *t*<sub>r</sub> = 20.98 and 46.34 min.

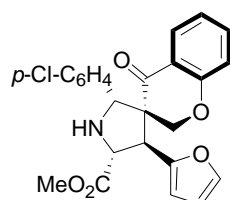

**(3af)**

**(2'R,3R,4'R,5'R)-methyl 2'-(4-chlorophenyl)-4'-(furan-2-yl)-4-oxospiro[chroman-3,3'-pyrrolidine]-5'-carboxylate**

The title compound was prepared according to the general procedure as described above in 89% yield. m.p. 146-148 °C;  $[\alpha]_D^{25} = +115.3$  (*c* 0.66, CHCl<sub>3</sub>); <sup>1</sup>H NMR (CDCl<sub>3</sub>, TMS, 300 MHz) δ 7.49 (d, *J* = 7.5 Hz, 1H), 7.40 (s, 1H), 7.29 (t, *J* = 7.5 Hz, 1H), 7.06 (d, *J* = 8.1 Hz, 2H), 6.96 (d, *J* = 8.4 Hz, 2H), 6.80 (t, *J* = 7.8 Hz, 1H), 6.69 (d, *J* = 8.7 Hz, 1H), 6.32 (s, 1H), 6.25 (s, 1H), 4.84 (s, 1H), 4.57 (d, *J* = 8.4 Hz, 1H), 4.40-4.35 (m, 2H), 3.98 (d, *J* = 12.0 Hz, 1H), 3.80 (s, 3H); <sup>13</sup>C NMR (CDCl<sub>3</sub>, TMS, 75 MHz) δ 192.03, 172.81, 160.54, 150.31, 142.69, 136.64, 135.90, 133.64, 129.22, 127.93, 127.33, 121.47, 121.11, 117.25, 110.68, 109.20, 72.37, 69.55, 62.74, 60.29,

52.71, 45.51; IR (KBr)  $\nu$  3680, 3620, 3019, 2980, 2399, 1736, 1606, 1519, 1478, 1425, 1215, 1040, 928, 758, 669  $\text{cm}^{-1}$ . The product was analyzed by HPLC to determine the enantiomeric excess: 91% ee (Chiralcel AS-H, *i*-propanol/hexane = 10/90, flow rate 1.0 mL/min,  $\lambda$  = 220 nm);  $t_r$  = 17.72 and 33.19 min.

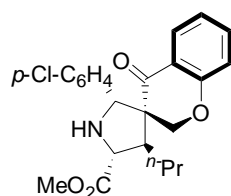

**(3ag)**

**(2'R,3R,4'R,5'R)-methyl 2'-(4-chlorophenyl)-4-oxo-4'-propylspiro[chroman-3,3'-pyrrolidine]-5'-carboxylate**

The title compound was prepared according to the general procedure as described above in 75% yield.  $[\alpha]_D^{25} = +86.7$  (c 0.72, CHCl<sub>3</sub>); <sup>1</sup>H NMR (CDCl<sub>3</sub>, TMS, 300 MHz)  $\delta$  7.46 (d,  $J$  = 8.4 Hz, 1H), 7.37 (t,  $J$  = 7.5 Hz, 1H), 6.98 (s, 4H), 6.87-6.83 (m, 2H), 4.74 (s, 1H), 4.48 (d,  $J$  = 11.1 Hz, 2H), 3.86 (s, 3H), 3.71 (d,  $J$  = 9.0 Hz, 1H), 3.29 (q,  $J$  = 8.4 Hz, 1H), 2.24 (brs, 1H), 1.55-1.49 (m, 2H), 1.34-1.21 (m, 1H), 0.89 (t,  $J$  = 6.6 Hz, 3H); <sup>13</sup>C NMR (CDCl<sub>3</sub>, TMS, 75 MHz)  $\delta$  191.90, 173.97, 160.29, 137.93, 135.66, 133.27, 128.99, 127.75, 127.42, 121.41, 121.20, 117.17, 70.93, 67.53, 64.81, 59.15, 52.37, 45.47, 29.79, 21.28, 14.17; IR (KBr)  $\nu$  3682, 3621, 3020, 2976, 2400, 1736, 1688, 1606, 1523, 1478, 1425, 1216, 1047, 929, 758, 669  $\text{cm}^{-1}$ . The product was analyzed by HPLC to determine the enantiomeric excess: 94% ee (Chiralcel AD-H, *i*-propanol/hexane = 30/70, flow rate 1.0 mL/min,  $\lambda$  = 220 nm);  $t_r$  = 7.35 and 11.10 min.

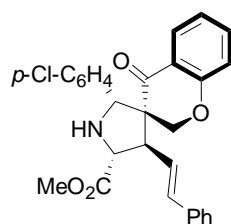

**(3ah)**

**(2'R,3R,4'R,5'R)-methyl 2'-(4-chlorophenyl)-4-oxo-4'-styrylspiro[chroman-**

### 3,3'-pyrrolidine]-5'-carboxylate

The title compound was prepared according to the general procedure as described above in 88% yield. m.p. 133-134 °C;  $[\alpha]_D^{25} = +159.3$  (*c* 1.28, CHCl<sub>3</sub>); <sup>1</sup>H NMR (CDCl<sub>3</sub>, TMS, 300 MHz) δ 7.45 (dd, *J* = 1.5 Hz, 7.8 Hz, 1H), 7.36-7.20 (m, 6H), 7.05-6.97 (m, 4H), 6.81-6.78 (m, 2H), 6.62 (d, *J* = 15.9 Hz, 1H), 6.05 (dd, *J* = 8.7 Hz, 15.3 Hz, 1H), 4.80 (s, 1H), 4.57 (d, *J* = 11.4 Hz, 1H), 4.43 (d, *J* = 12.0 Hz, 1H), 4.10 (t, *J* = 9.0 Hz, 1H), 3.99 (d, *J* = 9.3 Hz, 1H), 3.81 (s, 3H), 2.54 (brs, 1H); <sup>13</sup>C NMR (CDCl<sub>3</sub>, TMS, 75 MHz) δ 191.47, 173.04, 160.29, 137.29, 136.37, 135.70, 134.75, 133.46, 128.95, 128.53, 127.86, 127.26, 126.37, 123.23, 121.39, 121.21, 117.11, 71.71, 68.26, 64.20, 60.66, 52.41, 49.64; IR (KBr) ν 3681, 3618, 3019, 2979, 2400, 1736, 1686, 1606, 1517, 1478, 1425, 1215, 1040, 928, 758, 669 cm<sup>-1</sup>. The product was analyzed by HPLC to determine the enantiomeric excess: 93% ee (Chiralcel AD-H, *i*-propanol/hexane = 30/70, flow rate 1.0 mL/min, λ = 220 nm); *t*<sub>r</sub> = 17.88 and 34.69 min.

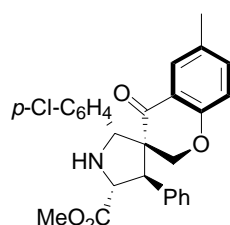

**(3ai)**

### (2'*R*,3*R*,4'*R*,5'*R*)-methyl 2'-(4-chlorophenyl)-6-methyl-4-oxo-4'-phenylspiro-[chroman-3,3'-pyrrolidine]-5'-carboxylate

The title compound was prepared according to the general procedure as described above in 95% yield. m.p. 206-208 °C;  $[\alpha]_D^{25} = +121.4$  (*c* 1.01, CHCl<sub>3</sub>); <sup>1</sup>H NMR (CDCl<sub>3</sub>, TMS, 300 MHz) δ 7.31-7.26 (m, 6H), 7.10 (d, *J* = 8.1 Hz, 3H), 6.99 (d, *J* = 8.7 Hz, 2H), 6.57 (d, *J* = 8.1 Hz, 1H), 4.84 (s, 1H), 4.52 (d, *J* = 8.7 Hz, 1H), 4.39 (d, *J* = 8.7 Hz, 1H), 4.15 (d, *J* = 12.0 Hz, 1H), 3.80 (d, *J* = 12.0 Hz, 1H), 3.78 (s, 3H), 2.16 (s, 3H); <sup>13</sup>C NMR (CDCl<sub>3</sub>, TMS, 75 MHz) δ 192.57, 173.27, 158.35, 136.74, 136.08, 133.43, 130.71, 129.15, 128.70, 128.50, 127.80, 127.61, 126.70, 120.68, 116.77, 72.99, 69.40, 63.97, 59.59, 52.53, 51.70, 20.19; IR (KBr) ν 3681, 3621, 3021, 2977,

2400, 1735, 1521, 1476, 1424, 1215, 1047, 929, 773, 669  $\text{cm}^{-1}$ . The product was analyzed by HPLC to determine the enantiomeric excess: 93% ee (Chiralcel AD-H, *i*-propanol/hexane = 30/70, flow rate 1.0 mL/min,  $\lambda$  = 220 nm);  $t_r$  = 15.56 and 21.28 min.

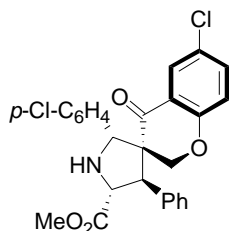

**(3aj)**

**(2'*R*,3*R*,4'*R*,5'*R*)-methyl 6-chloro-2'-(4-chlorophenyl)-4-oxo-4'-phenylspiro-[chroman-3,3'-pyrrolidine]-5'-carboxylate**

The title compound was prepared according to the general procedure as described above in 87% yield.  $[\alpha]_D^{25} = +105.6$  (*c* 1.12,  $\text{CHCl}_3$ );  $^1\text{H}$  NMR ( $\text{CDCl}_3$ , TMS, 300 MHz)  $\delta$  7.45 (d,  $J$  = 2.4 Hz, 1H), 7.33-7.20 (m, 7H), 7.11-7.05 (m, 4H), 6.63 (d,  $J$  = 9.0 Hz, 1H), 4.87 (s, 1H), 4.52-4.45 (m, 2H), 4.20 (d,  $J$  = 12.0 Hz, 1H), 3.82 (d,  $J$  = 14.4 Hz, 1H), 3.79 (s, 3H);  $^{13}\text{C}$  NMR ( $\text{CDCl}_3$ , TMS, 75 MHz)  $\delta$  191.45, 172.77, 158.74, 135.65, 134.01, 129.12, 128.86, 128.48, 128.06, 127.89, 126.86, 126.36, 118.80, 73.06, 69.50, 64.03, 59.20, 52.76, 51.76; IR (KBr)  $\nu$  3682, 3620, 3020, 2978, 2429, 2400, 1736, 1523, 1479, 1428, 1219, 1043, 929, 773, 669  $\text{cm}^{-1}$ . The product was analyzed by HPLC to determine the enantiomeric excess: 93% ee (Chiralcel AD-H, *i*-propanol/hexane = 30/70, flow rate 1.0 mL/min,  $\lambda$  = 220 nm);  $t_r$  = 14.90 and 17.95 min.

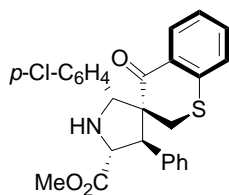

**(3ak)**

**(2*R*,3*S*,4*R*,5*R*)-methyl 2-(4-chlorophenyl)-4'-oxo-4-phenylspiro[pyrrolidine-3,3'-**

### thiochroman]-5-carboxylate

The title compound was prepared according to the general procedure as described above in 93% yield.  $[\alpha]_D^{25} = +124.3$  ( $c$  1.06,  $\text{CHCl}_3$ );  $^1\text{H}$  NMR ( $\text{CDCl}_3$ , TMS, 300 MHz)  $\delta$  7.58 (d,  $J = 8.1$  Hz, 1H), 7.36-7.16 (m, 9H), 7.01-6.93 (m, 3H), 5.17 (s, 1H), 4.78 (d,  $J = 7.2$  Hz, 1H), 4.40 (d,  $J = 12.0$  Hz, 1H), 3.71 (s, 3H), 3.04 (d,  $J = 13.8$  Hz, 1H), 2.85 (d,  $J = 14.7$  Hz, 1H);  $^{13}\text{C}$  NMR ( $\text{CDCl}_3$ , TMS, 75 MHz)  $\delta$  192.76, 173.19, 139.76, 138.06, 135.37, 133.42, 132.90, 130.62, 130.40, 129.39, 129.06, 128.45, 127.78, 127.53, 126.30, 124.67, 66.53, 62.12, 60.15, 53.48, 52.51, 34.28; IR (KBr)  $\nu$  3683, 3621, 3019, 2980, 2400, 1736, 1686, 1606, 1517, 1478, 1425, 1215, 1040, 928, 758, 669  $\text{cm}^{-1}$ . The product was analyzed by HPLC to determine the enantiomeric excess: 95% ee (Chiralcel AD-H, *i*-propanol/hexane = 30/70, flow rate 1.0 mL/min,  $\lambda = 220$  nm);  $t_r = 12.40$  and 22.69 min.

### X-ray Crystal Structures of (2'*R*,3*R*,4'*R*,5'*R*)-3aa

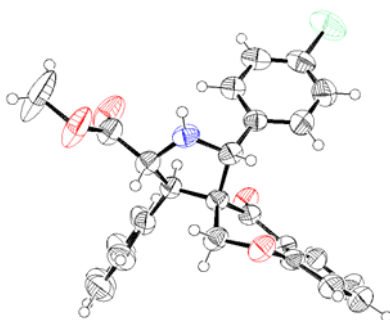

**Figure 2.** X-ray structure of (2'*R*,3*R*,4'*R*,5'*R*)-3aa.

For (2'*R*,3*R*,4'*R*,5'*R*)-**3aa**:  $\text{C}_{26}\text{H}_{22}\text{ClNO}_4$ ,  $M_r = 447.90$ ,  $T = 293$  K, Orthorhombic, space group  $P2_12_12_1$ ,  $a = 9.960(9)$ ,  $b = 12.124(11)$ ,  $c = 18.738(16)$  Å,  $V = 2263(3)$  Å<sup>3</sup>,  $Z = 4$ , 4436 reflections measured, 2920 unique ( $R_{\text{int}} = 0.0503$ ) which were used in all calculations. The final  $wR_2 = 0.1037$ (all data), Flack  $\chi = -0.10(10)$ . CCDC 828929 (**3aa**).

## References

- [1] C.-J. Wang, G. Liang, Z-Y. Xue, F. Gao, *J. Am. Chem. Soc.* **2008**, *130*, 17250.
- [2] (a) K. M.Dawood, T. Fuchigami, *J. Org. Chem.*, **2001**, *66*, 7691. (b) D. Basavaiah, M. Bakthadoss, S. Pandiaraju, *chem.commun.*, **1998**, 1639. (c) S. H. Kim, S. H. Kim, J. N. Kim, *Bull. Korean Chem. Soc.* **2008**, *29*, 2039.

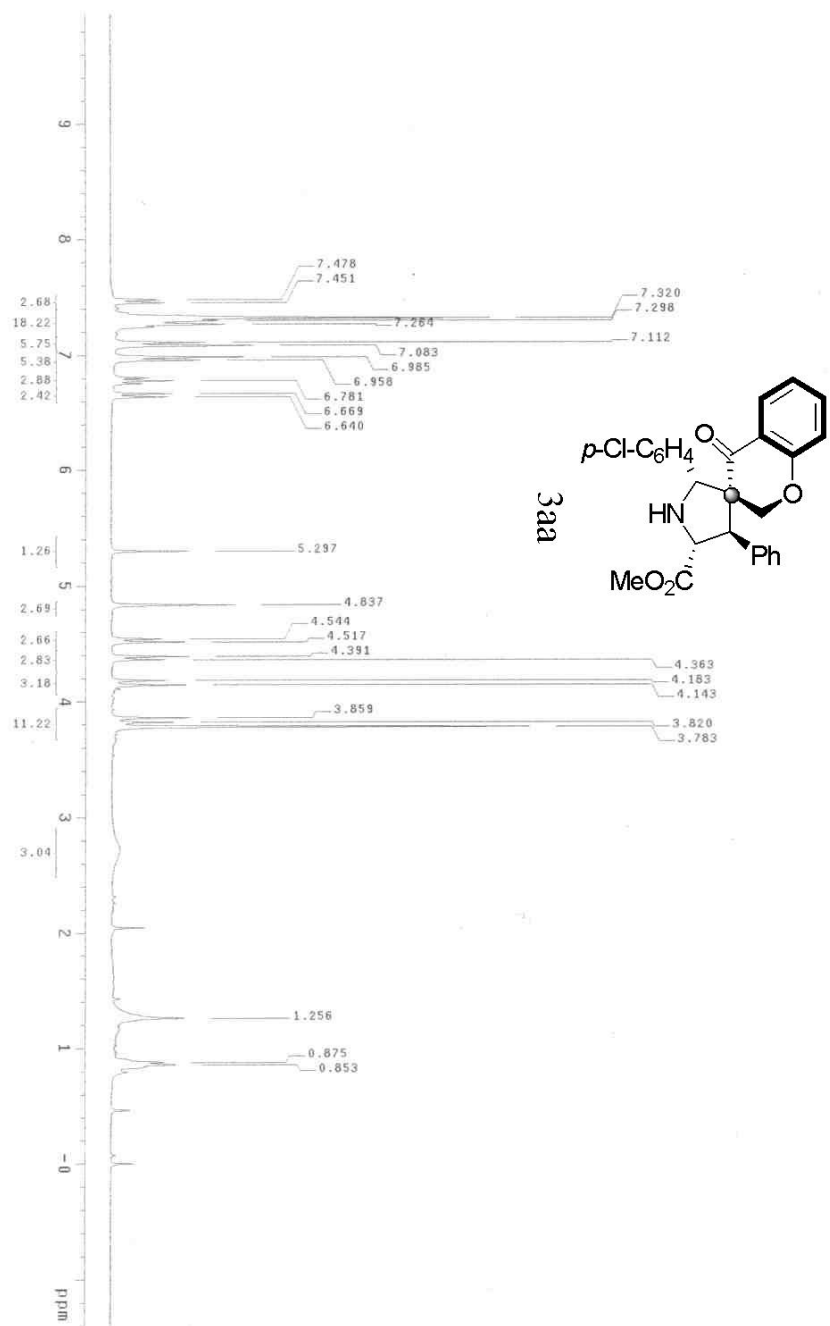

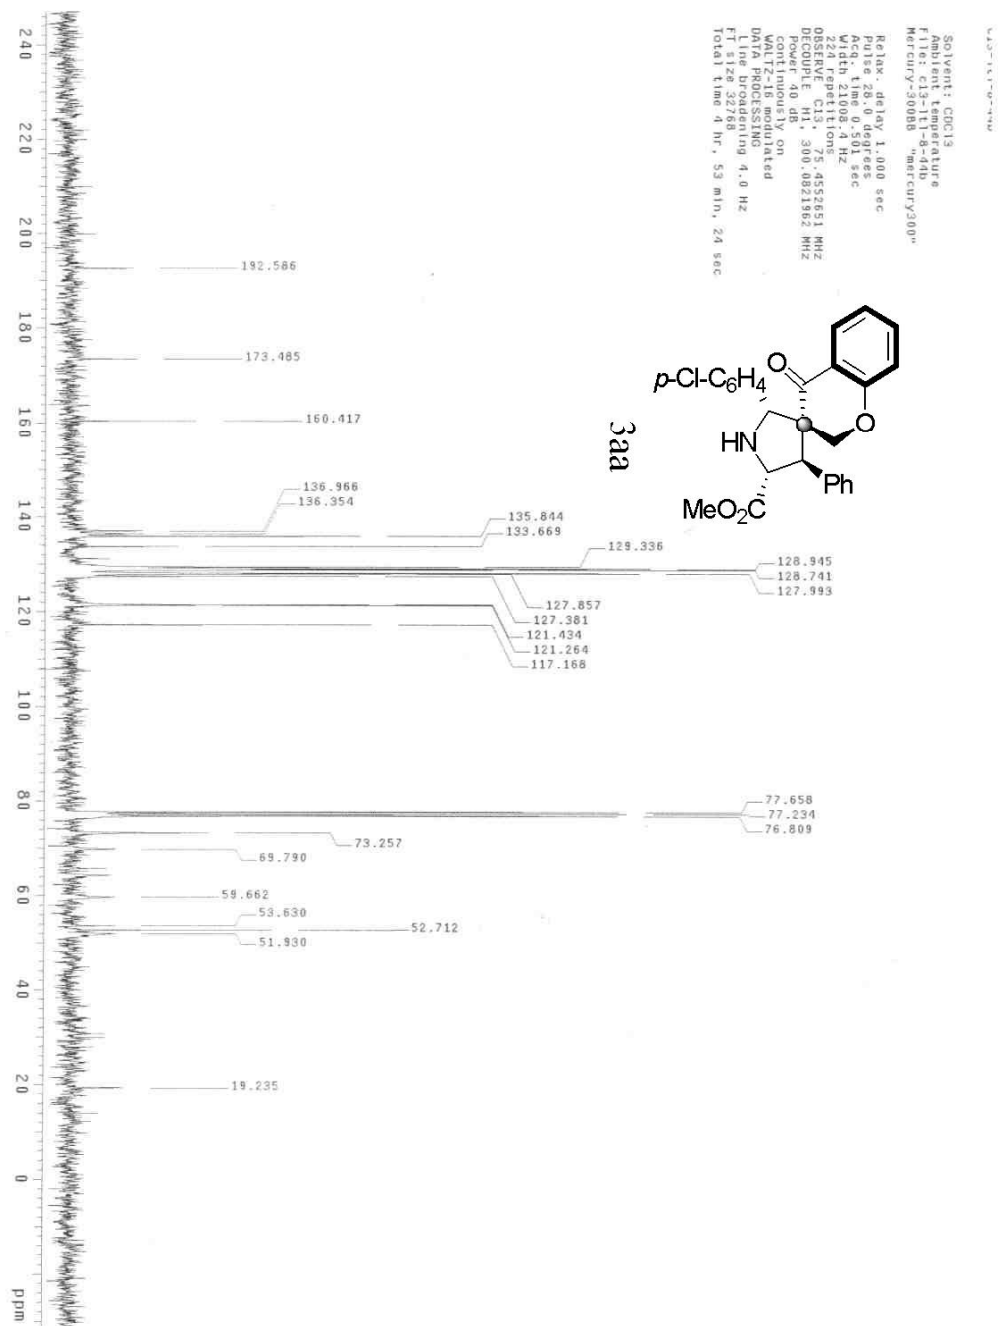



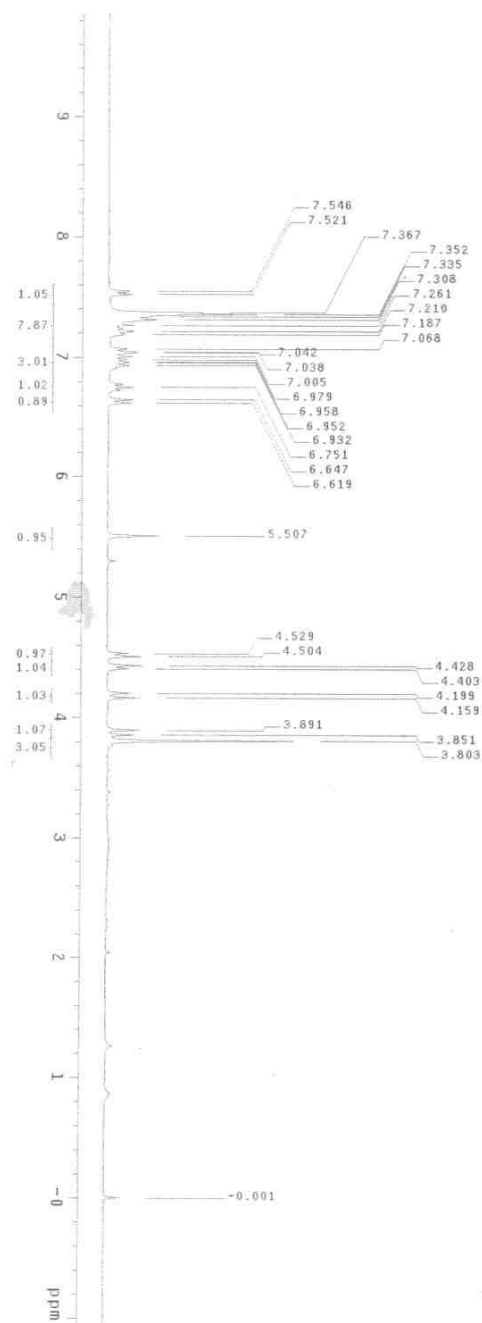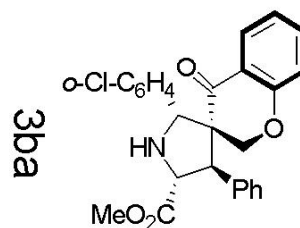

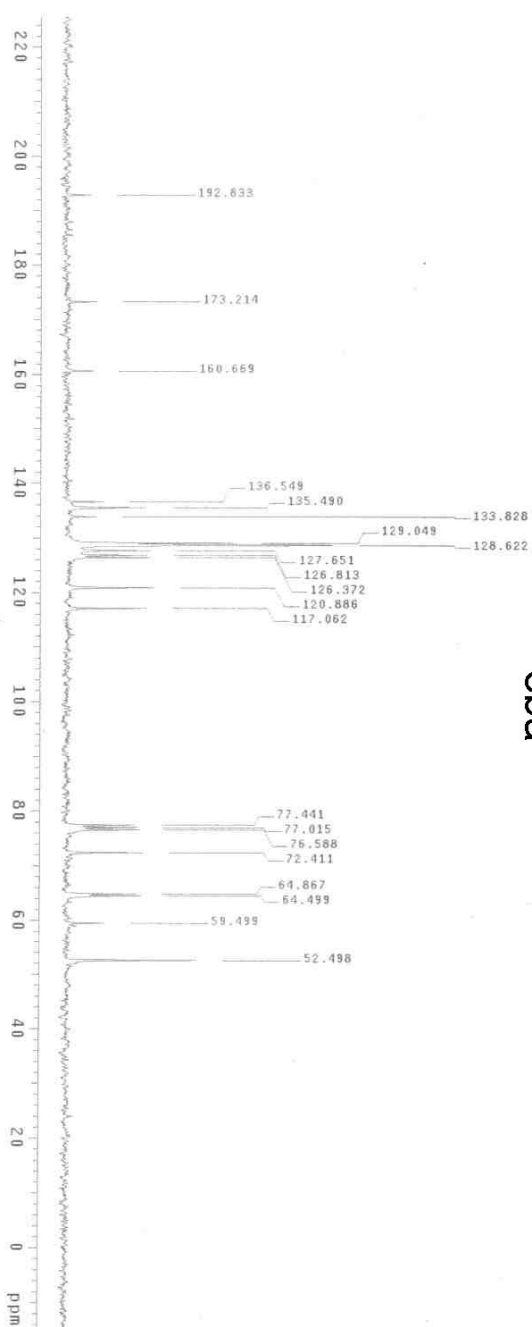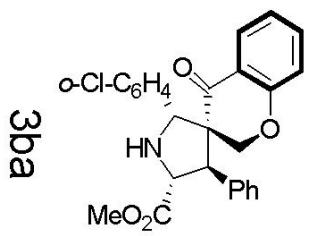

Solvent: CDCl<sub>3</sub>  
Temperature: 300.2 K  
Pulse: delay 1.000 sec  
Pulse: 28.0 degrees  
Acq. time: 0.500 sec  
F1: 125.763 MHz  
F2: 101.626 MHz  
128 repetitions  
OBSERVE: C13, 75.4552827 MHz  
DECOUPLE: H1, 300.0821362 MHz  
F1: 125.763 MHz  
F2: 101.626 MHz  
Coupling: on  
Continuity: on  
WALTZ-16 modulated  
DATA PROCESSING  
Line broadening 8.0 Hz  
F1: 125.763 MHz  
F2: 101.626 MHz  
Total time 9 hr, 10 min, 41 sec

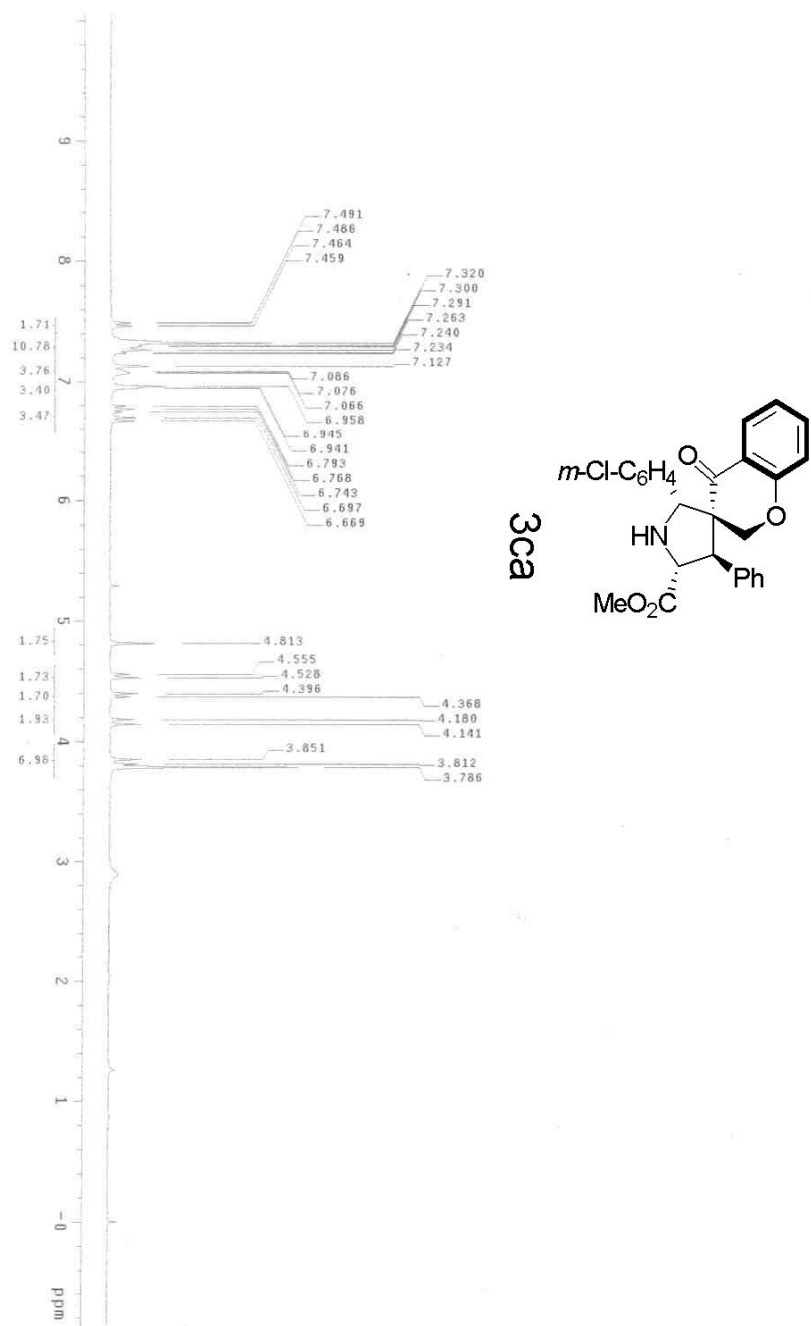

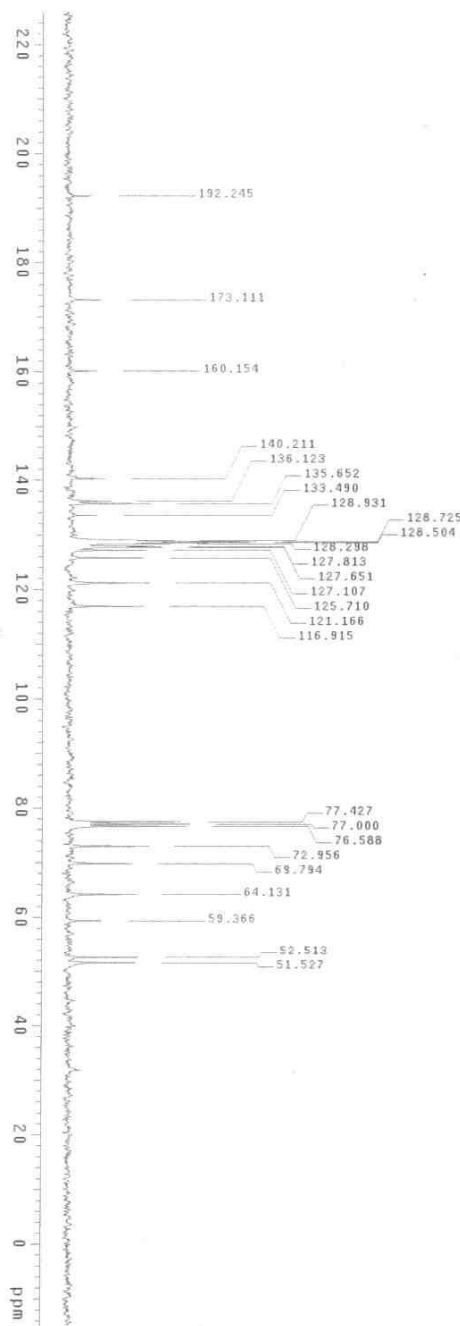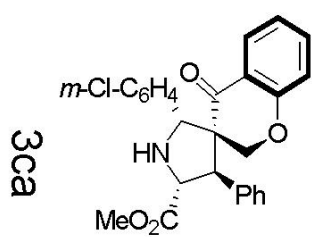

Solvent: CDCl3  
Ambient temperature  
Mercury-300DB "mercury300"  
Relax, delay 1.000 sec  
Pulse 28.0 degrees  
Acquisition time 0.000 sec  
With 18181.8 Hz  
144 repetitions  
OBSERVE C13, 75.4552516 MHz  
DECOUPLE H1, 300.0821362 MHz  
Pulse program zgpg30  
continuously on  
WALTZ-16 modulated  
DATA PROCESSING  
F1 time processing 8.0 Hz  
F2 time processing 0.0 Hz  
F3 time processing 0.0 Hz  
Total time 9 hr, 10 min, 41 sec

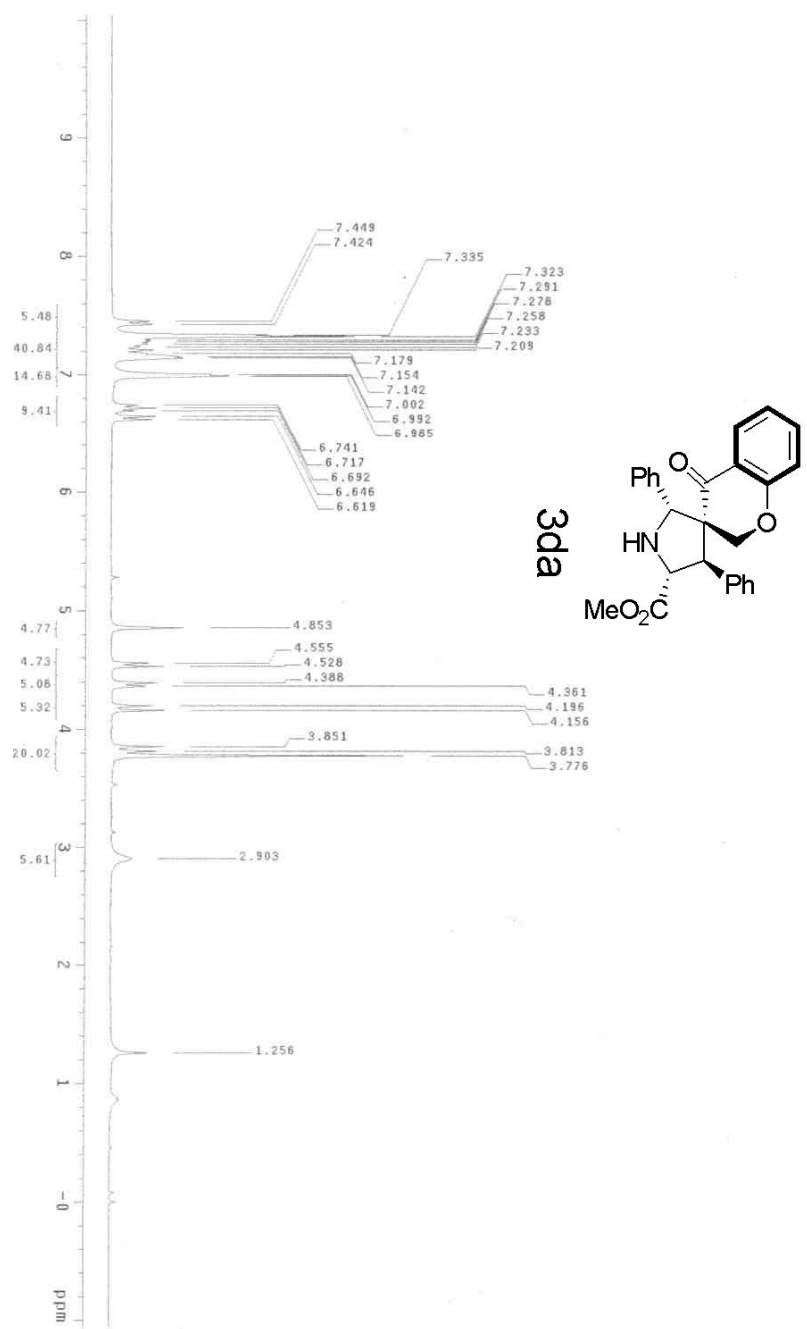

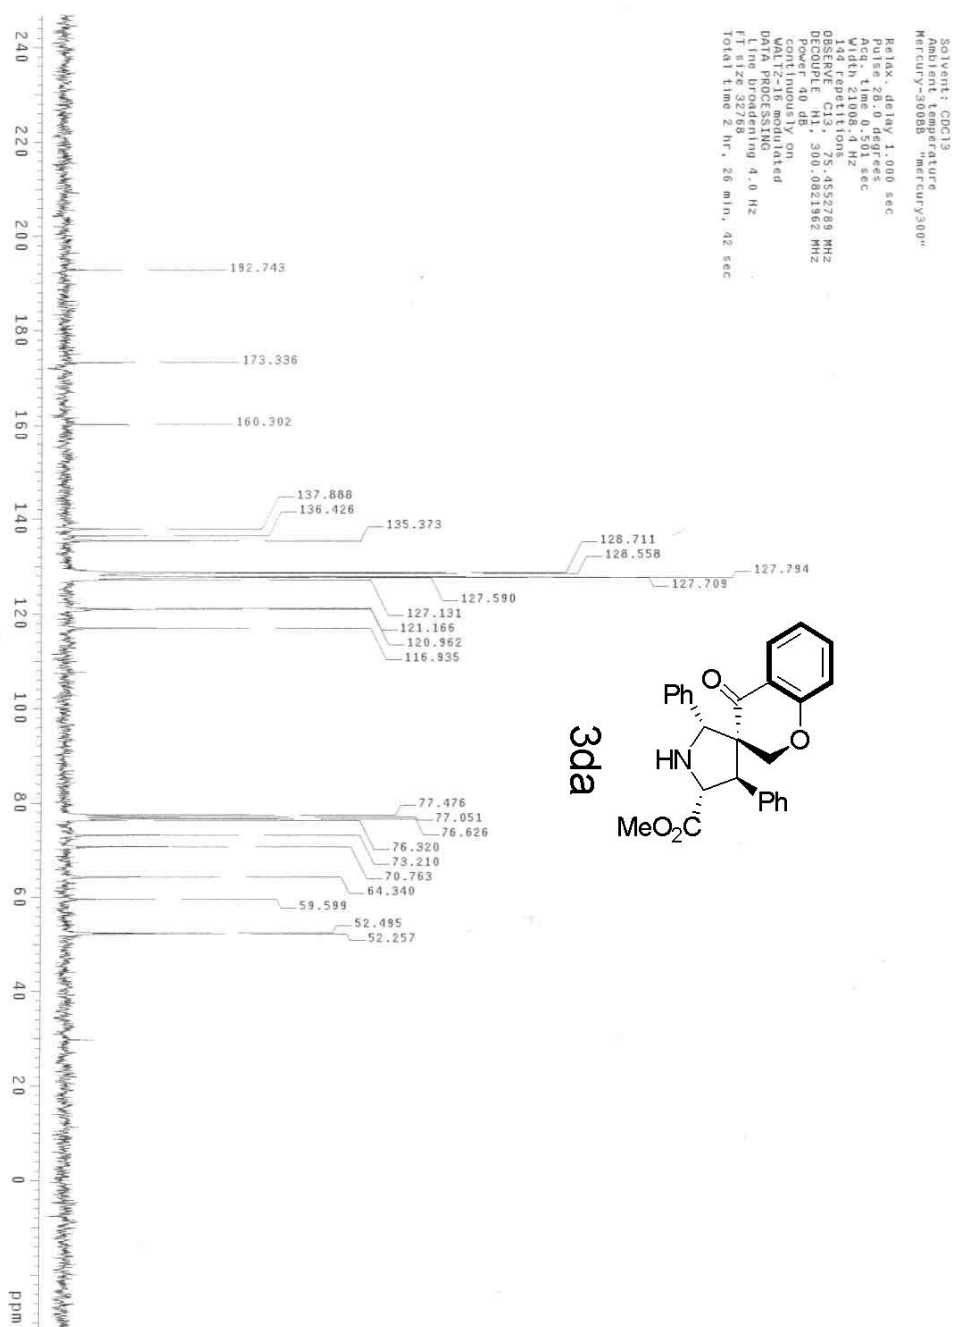

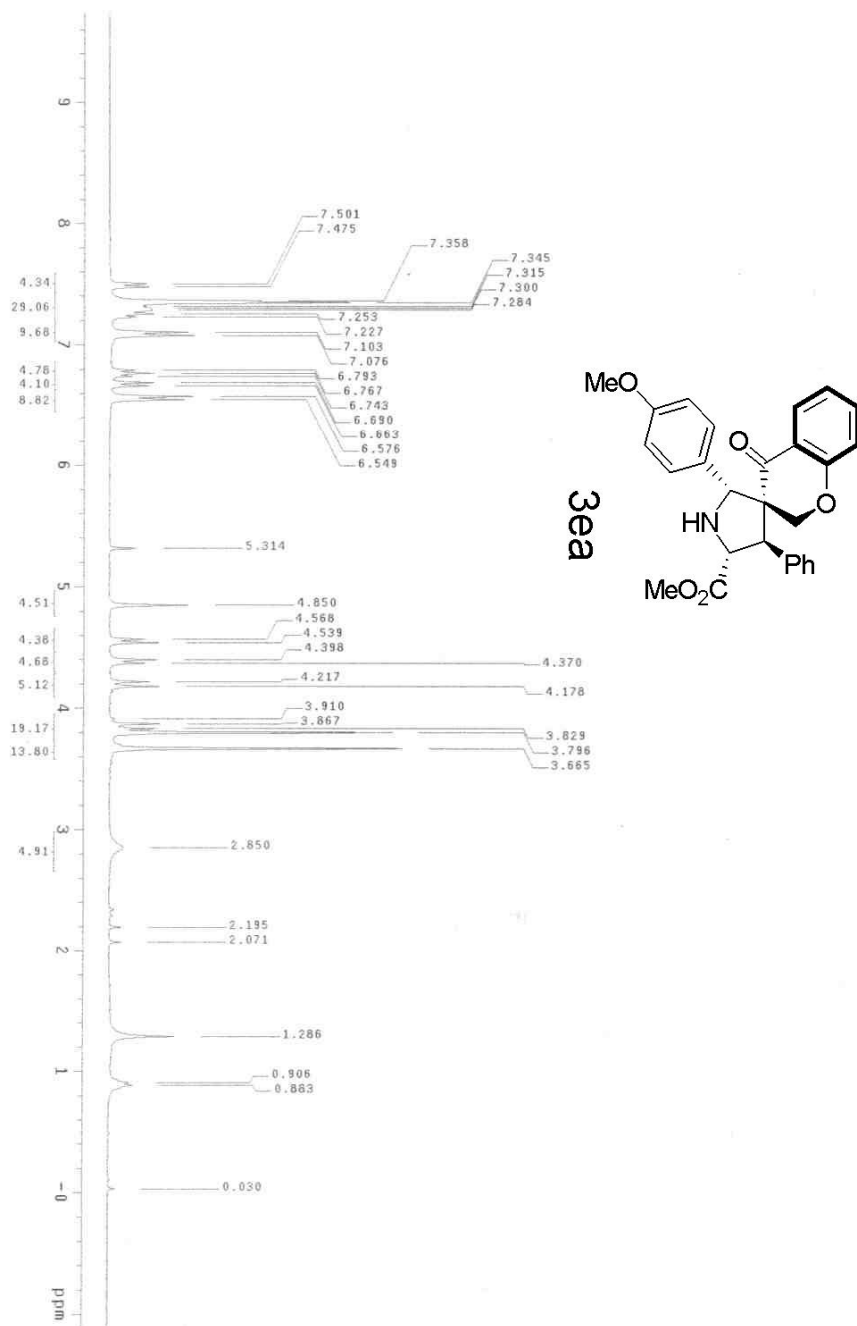

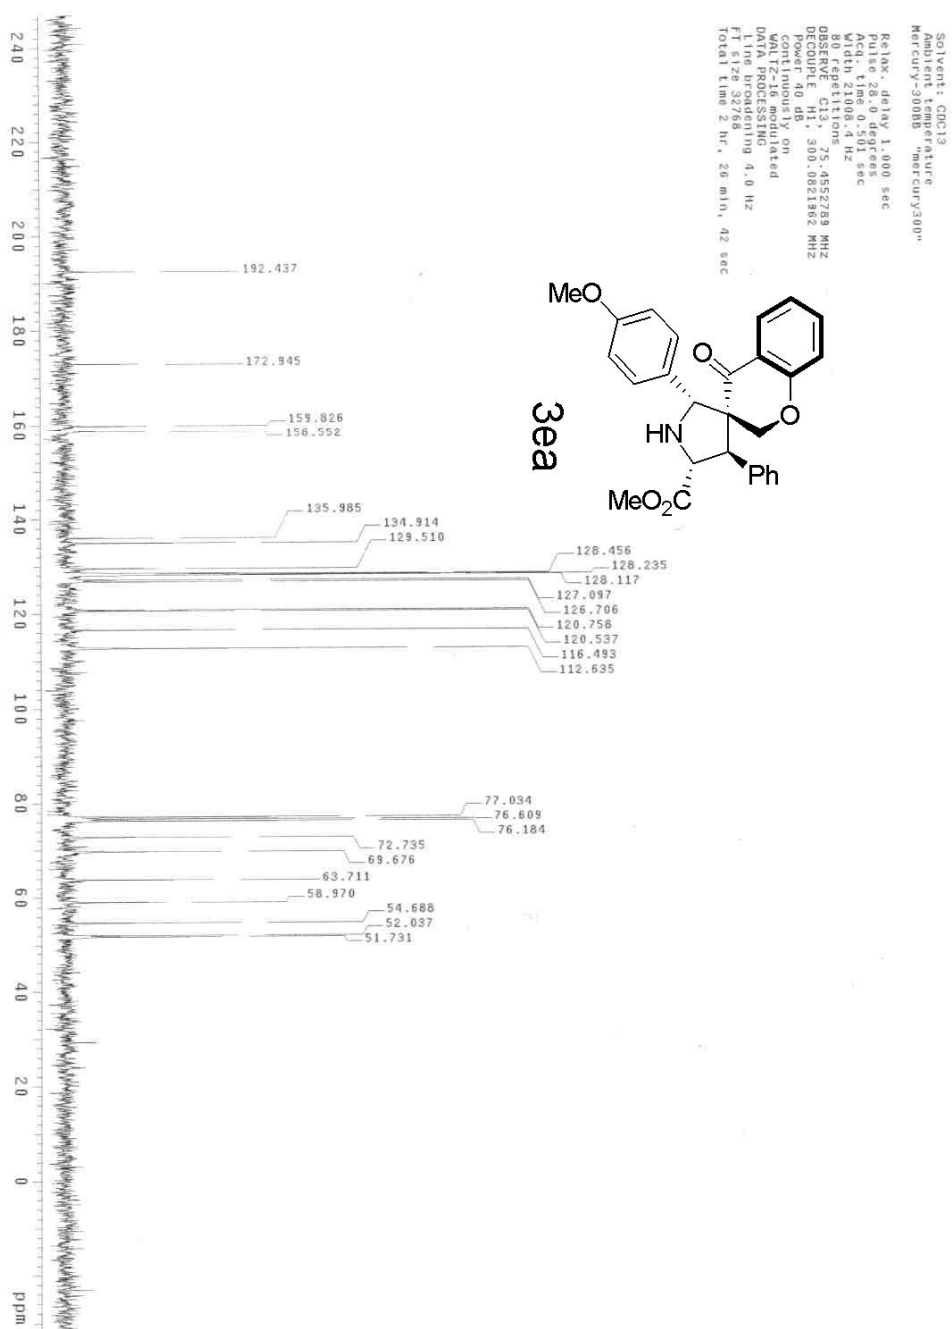



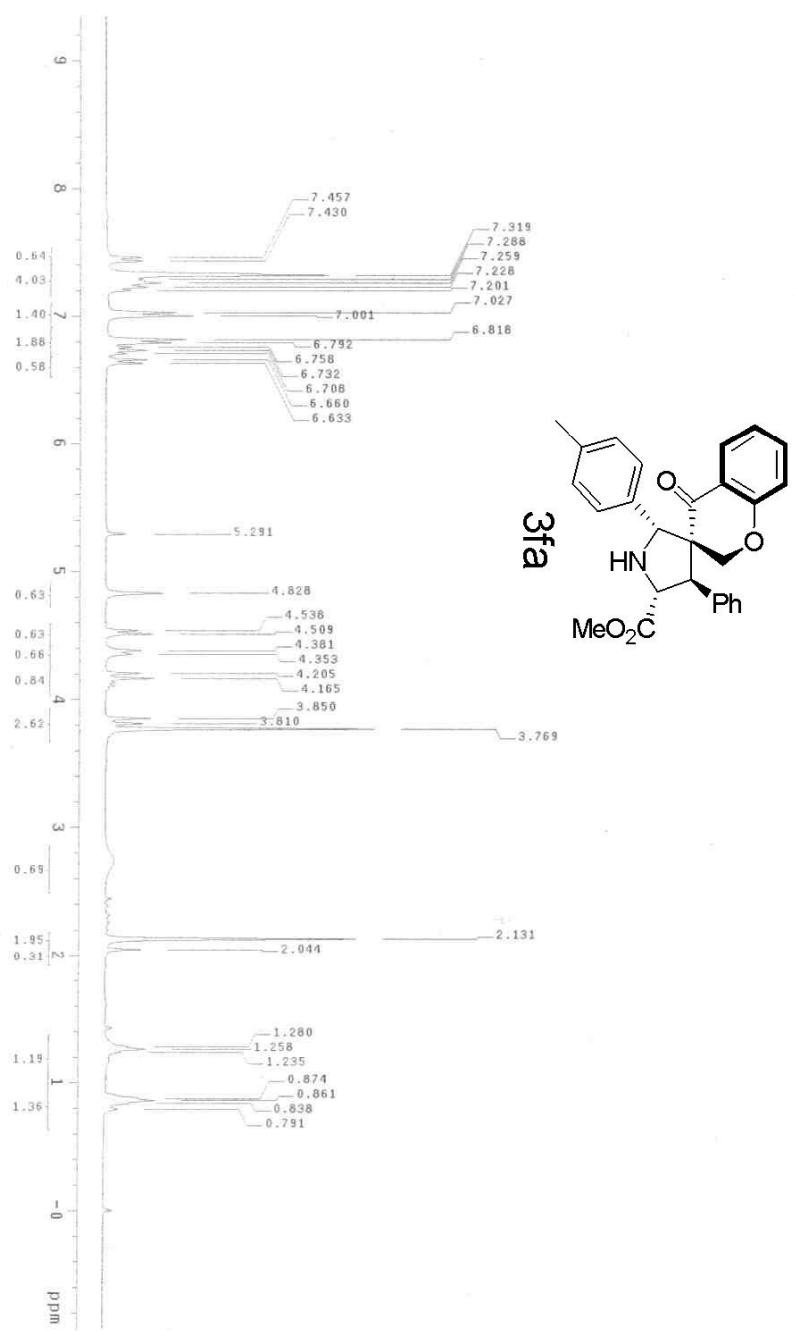

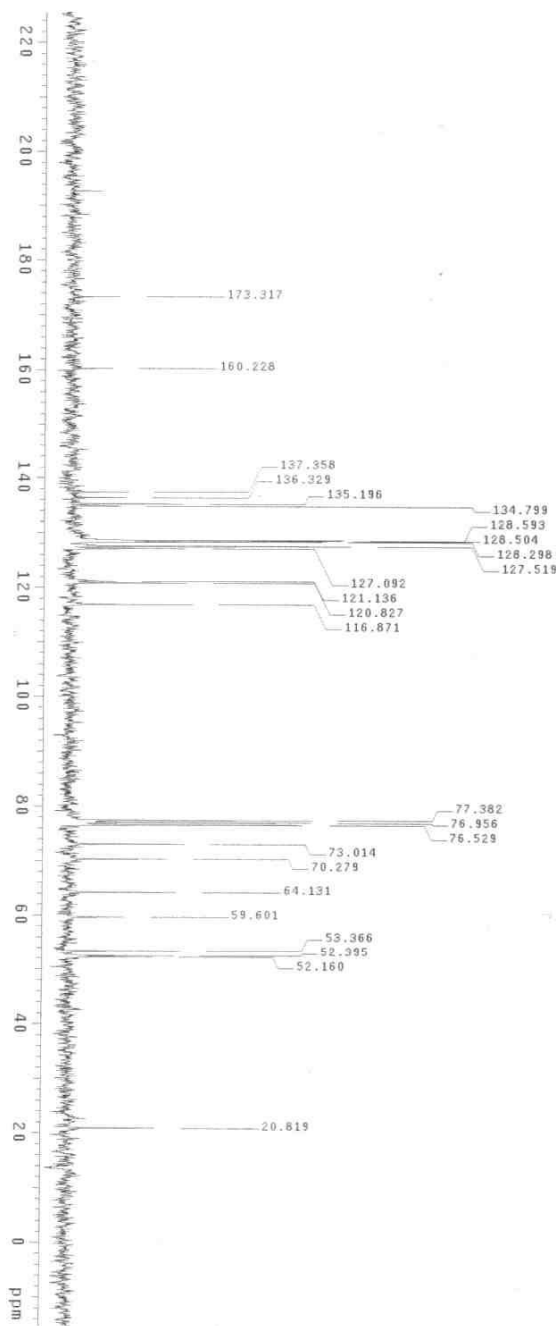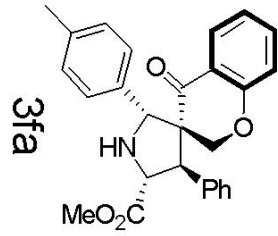

c13-11-9-308  
Archive directory: /export/home/jm/vnmrsys/data  
Sample directory:  
File: CARBON  
Pulse Sequence: zgpg30  
Solvent: CDCl<sub>3</sub>  
Ambient temperature:  
Mercury-30088 "mercury300"  
Relax: delay 1.000 sec  
Pulse: zgpg30  
Pulse program: zgpg30  
Width: 18181.8 Hz  
152 repetitions  
OBSERVE: c13, 75.455871 MHz  
DECOUPLE: h1, 300.0821862 MHz  
SOLVENT: CDCl<sub>3</sub>  
Continuous on  
WALTZ-16 modulated  
DATA PROCESSING  
Time: 0.00000000  
Time: 0.00000000  
Time: 0.00000000  
Total time: 1 hr, 27 min, 30 sec

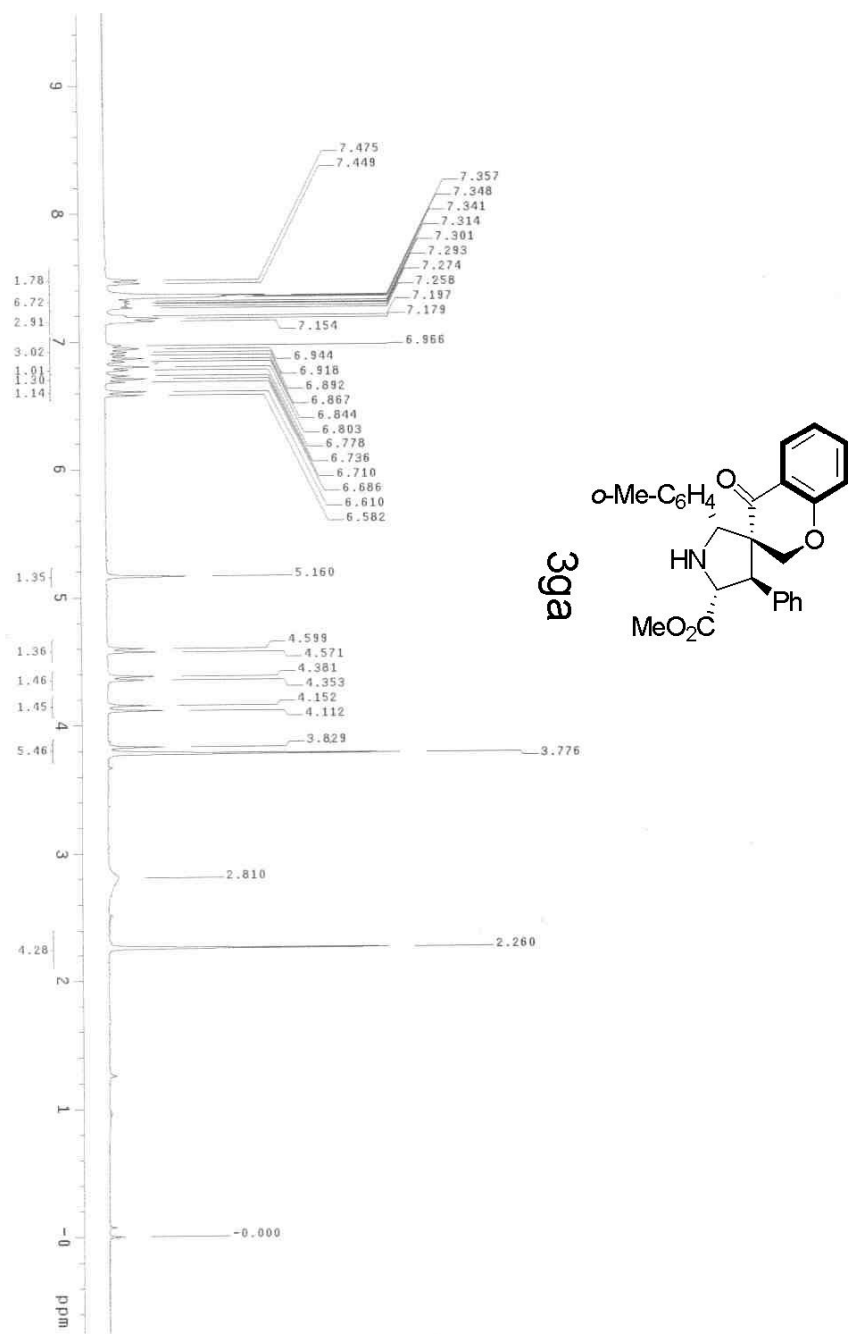

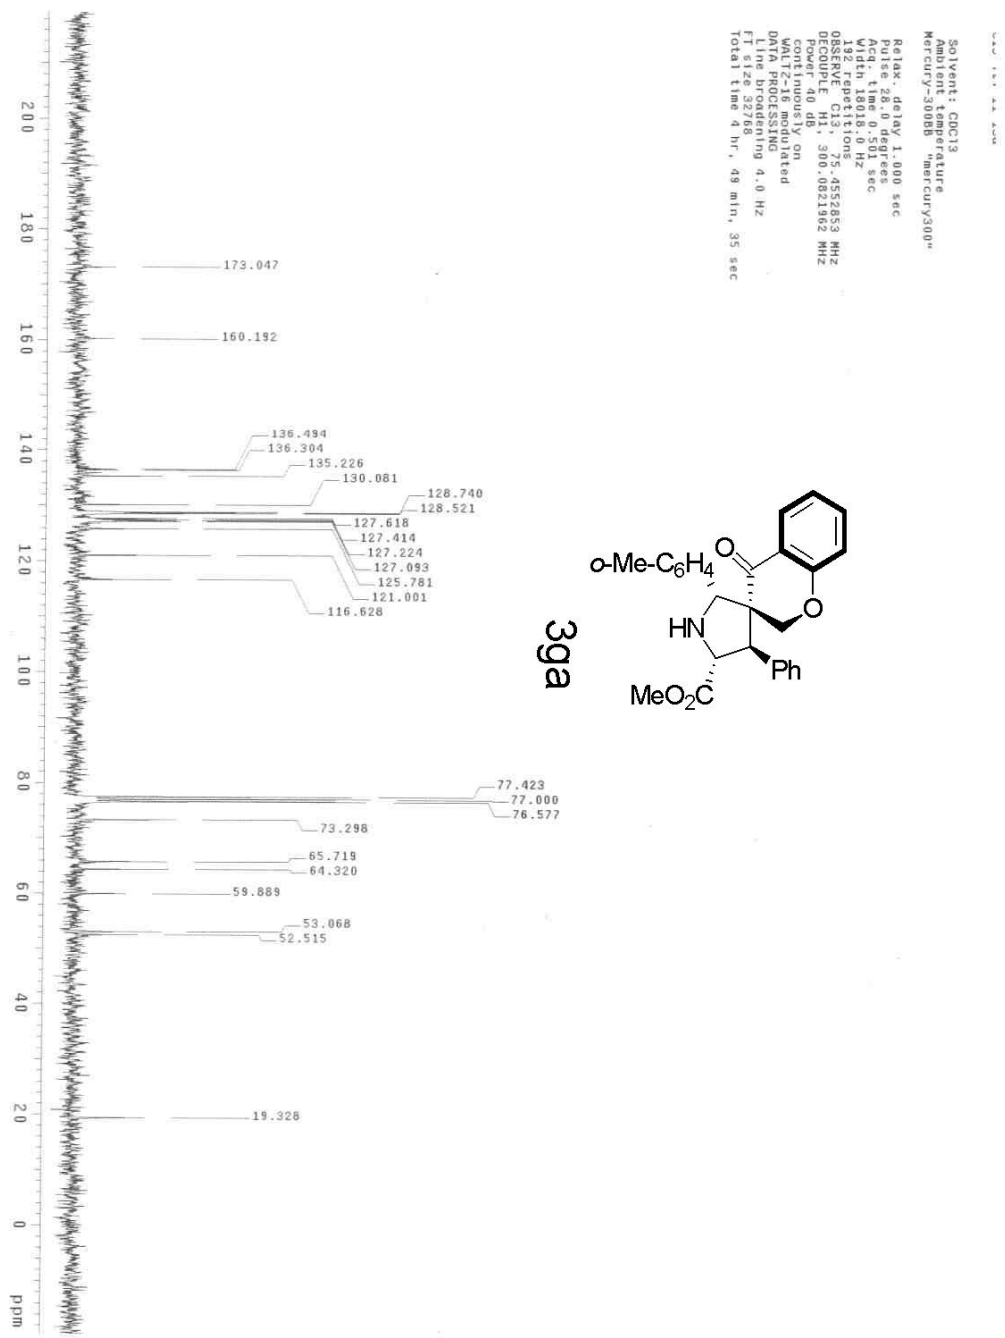

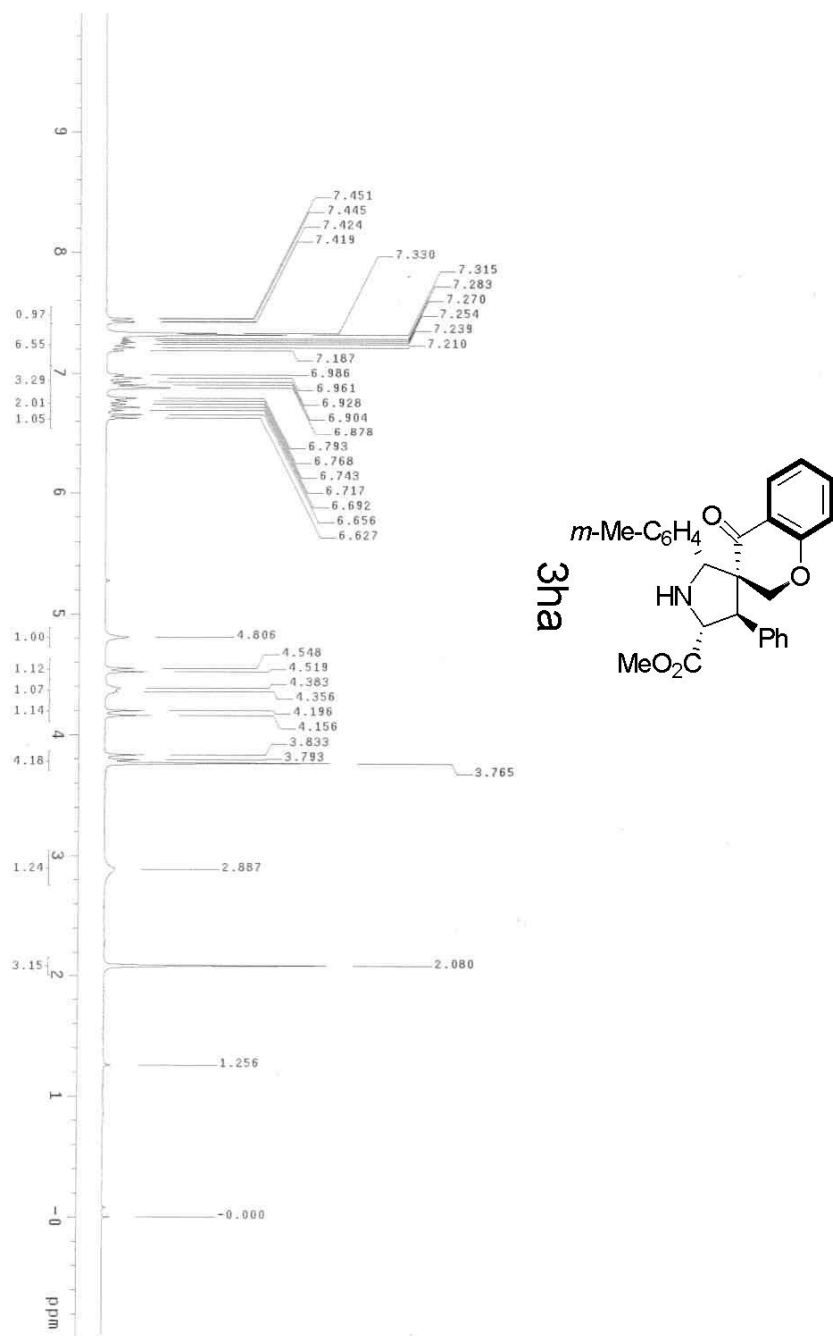

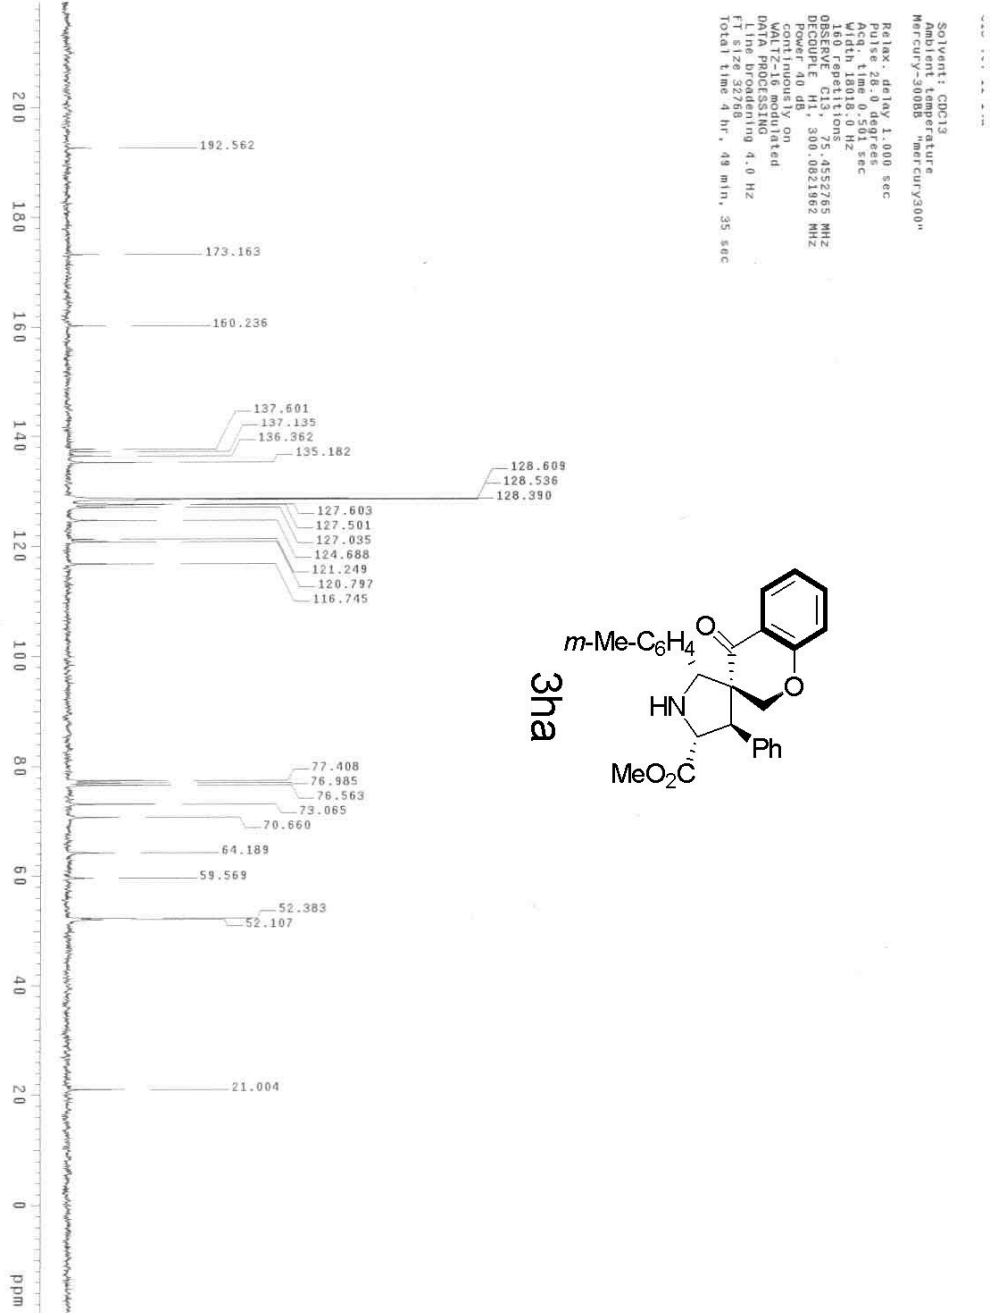

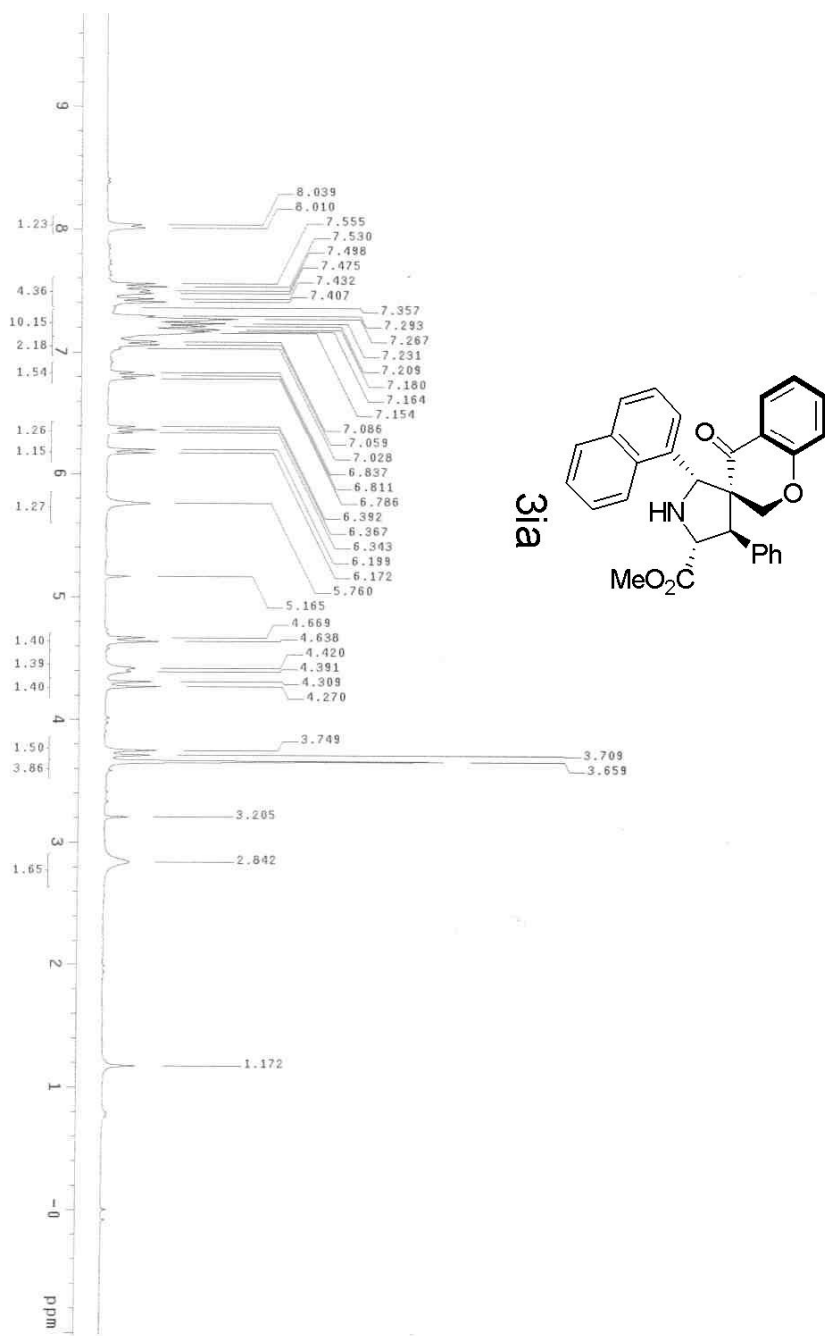

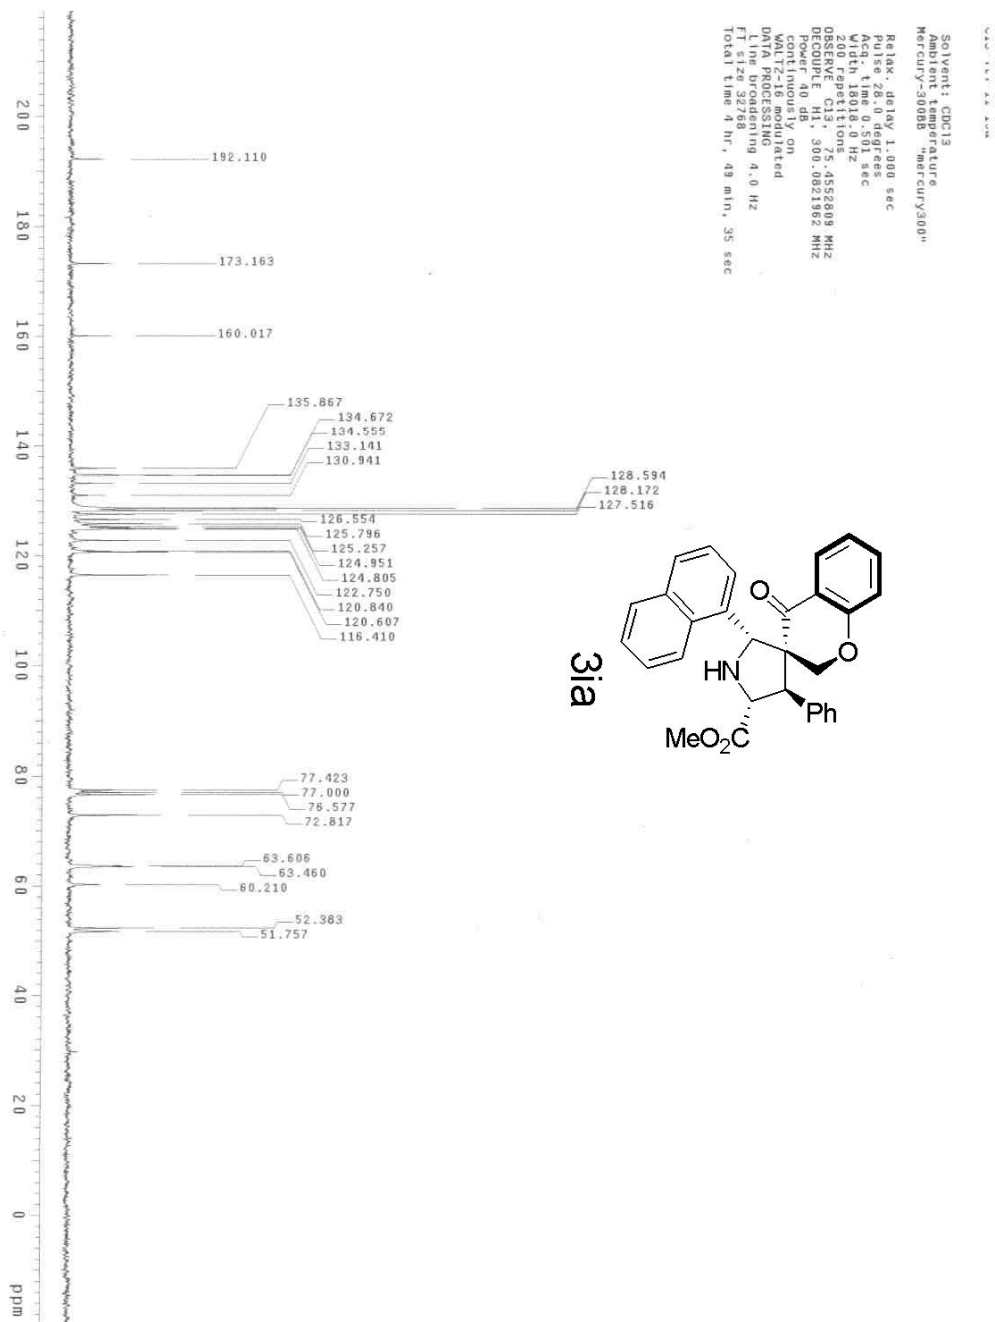



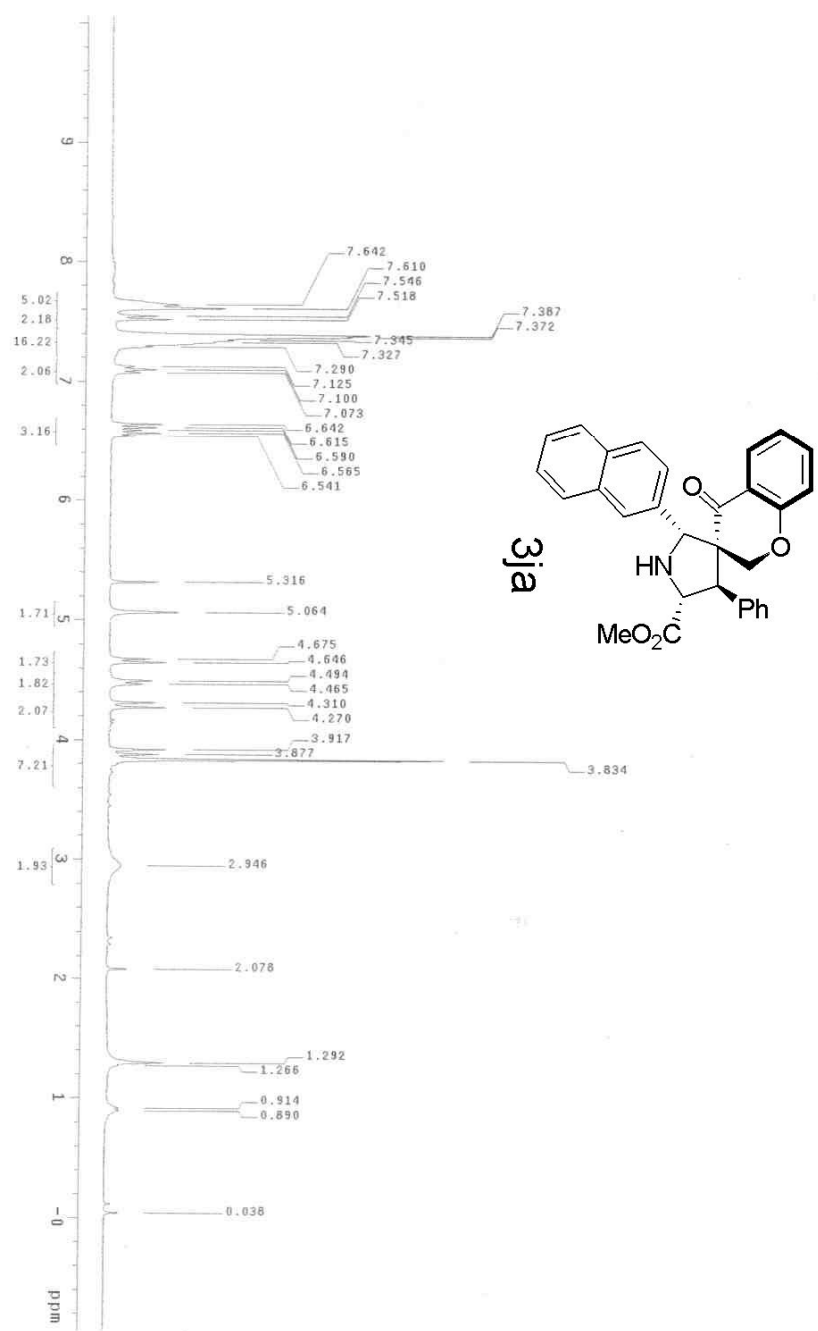

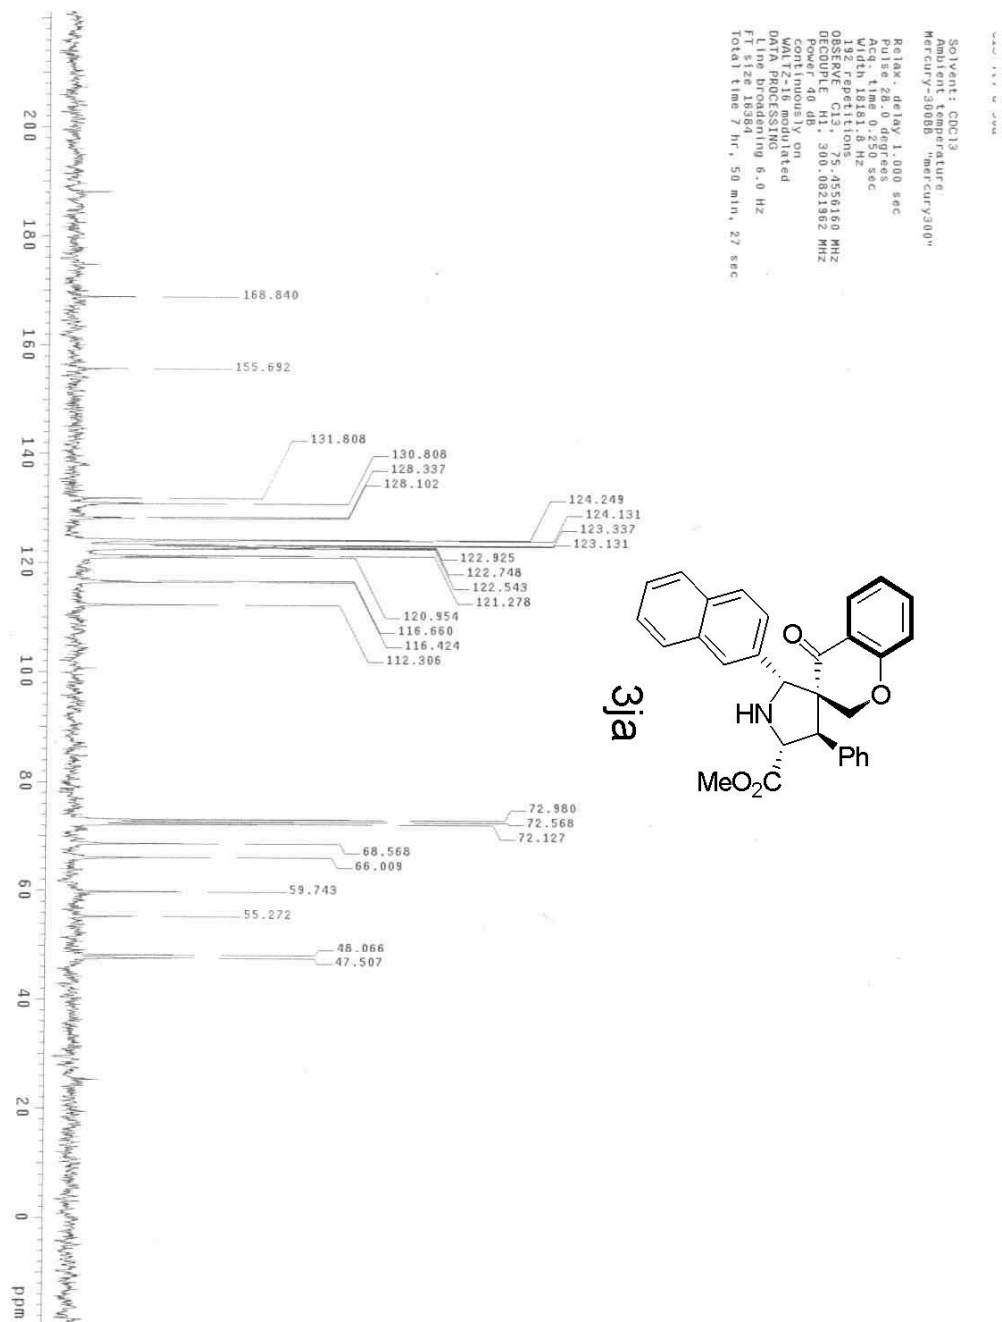

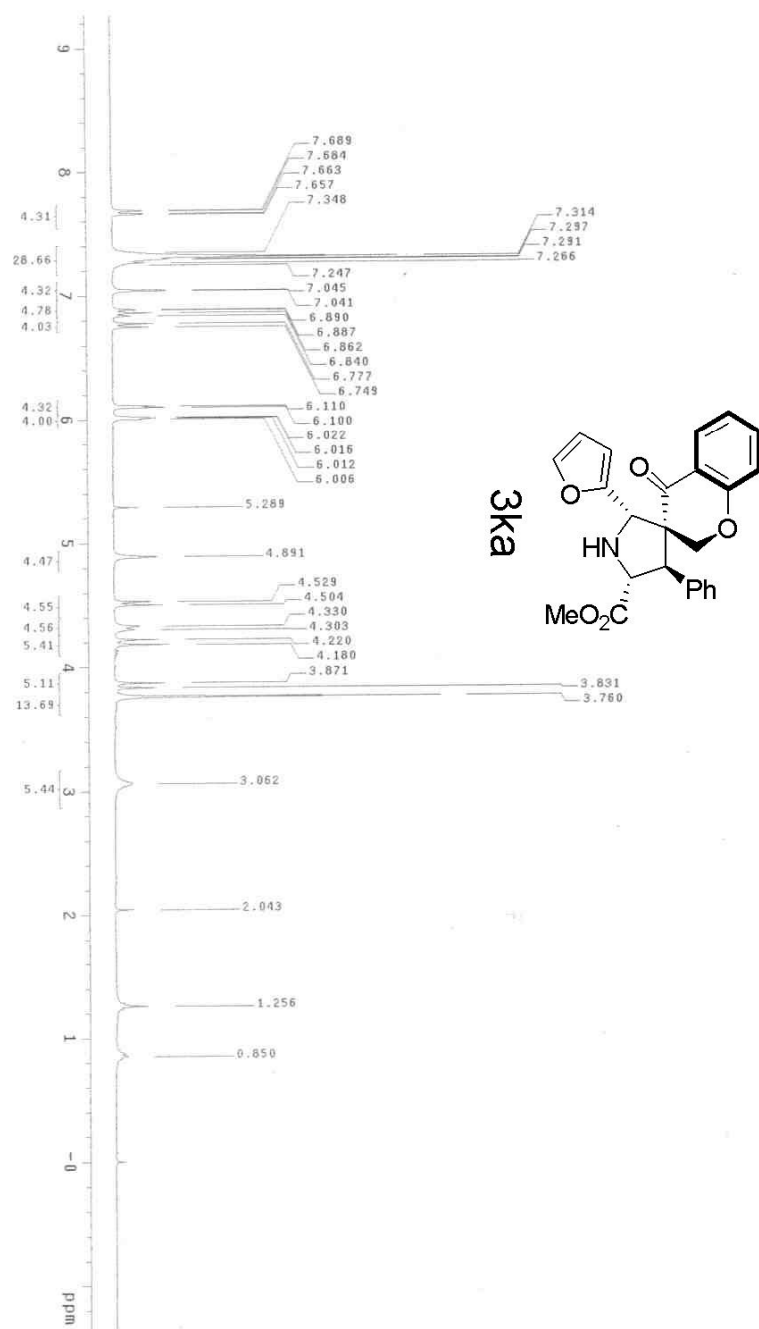

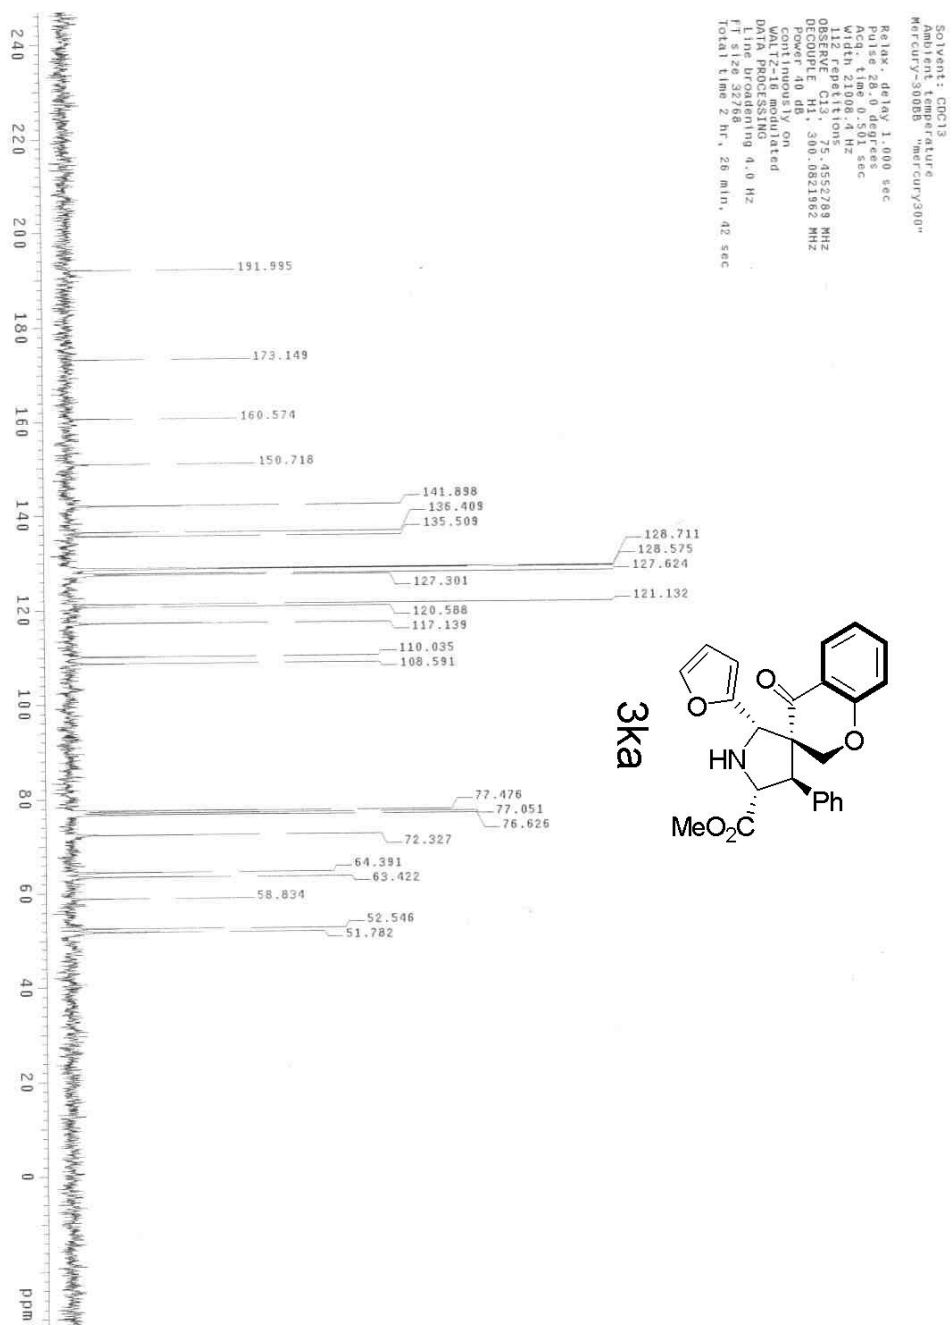

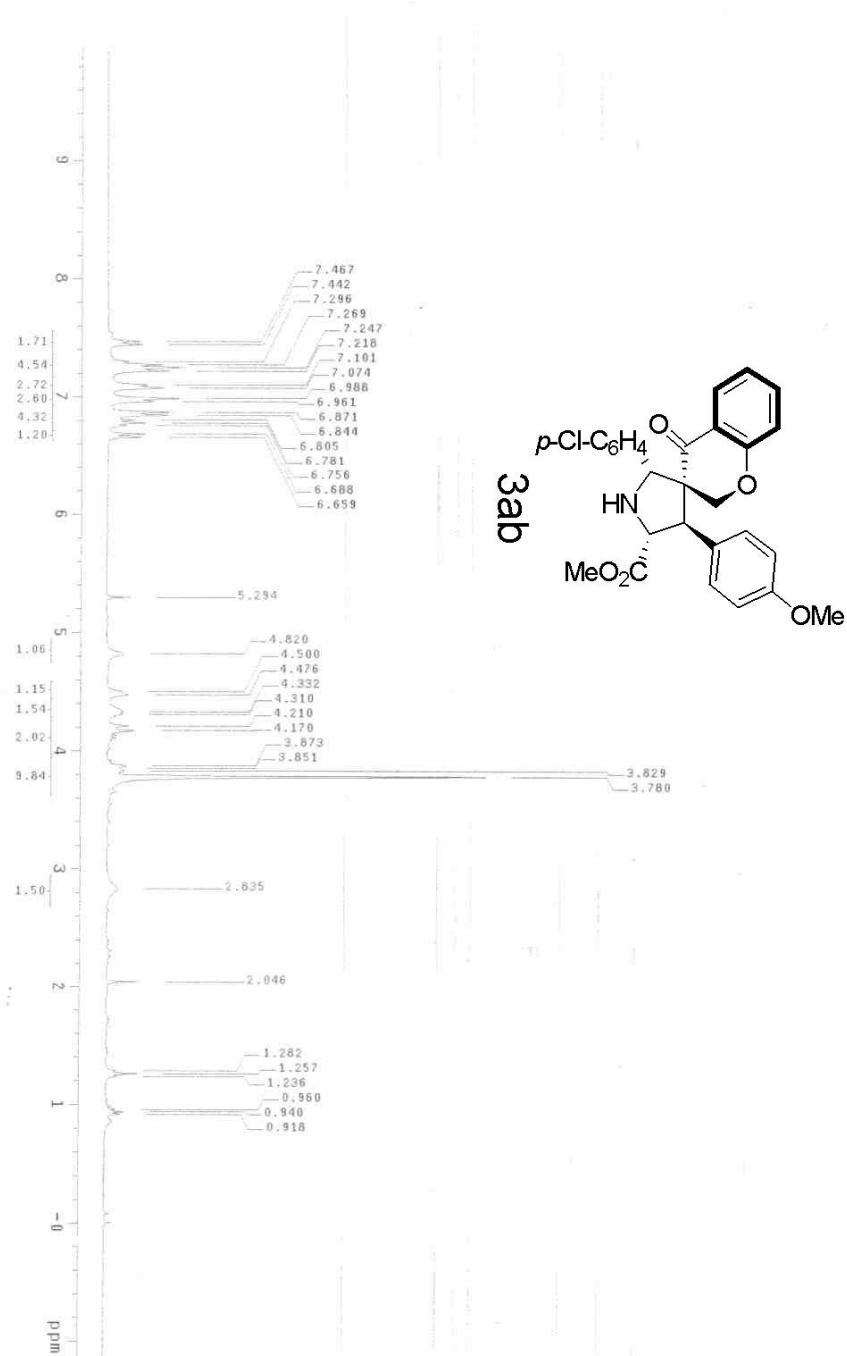

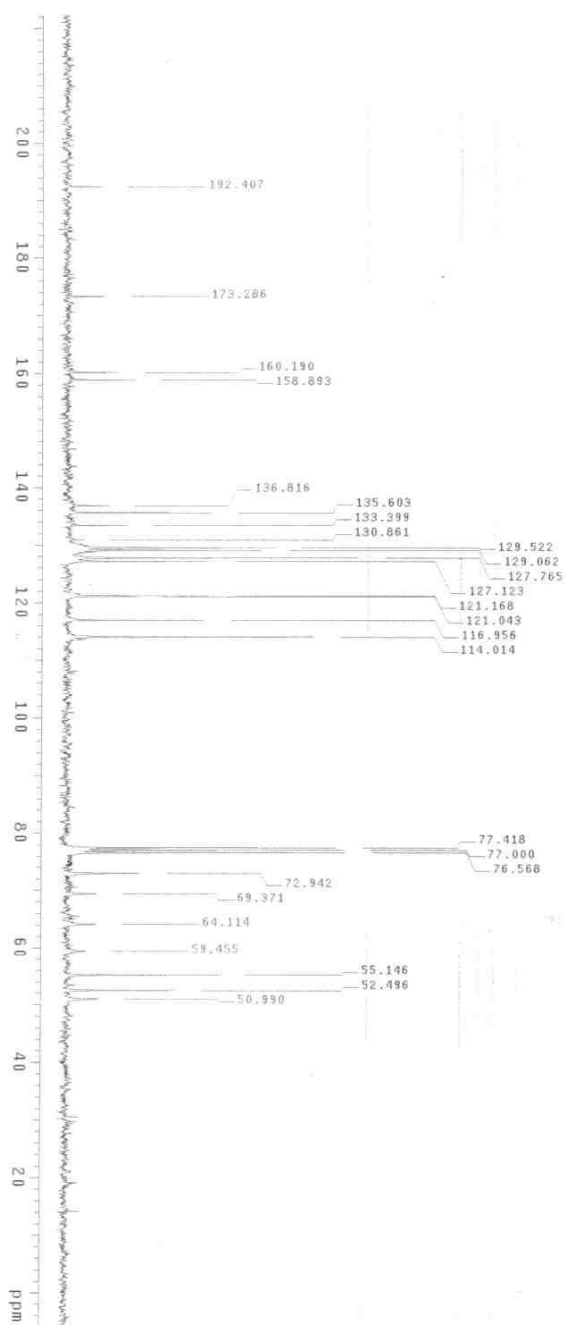

C13-111-8-616

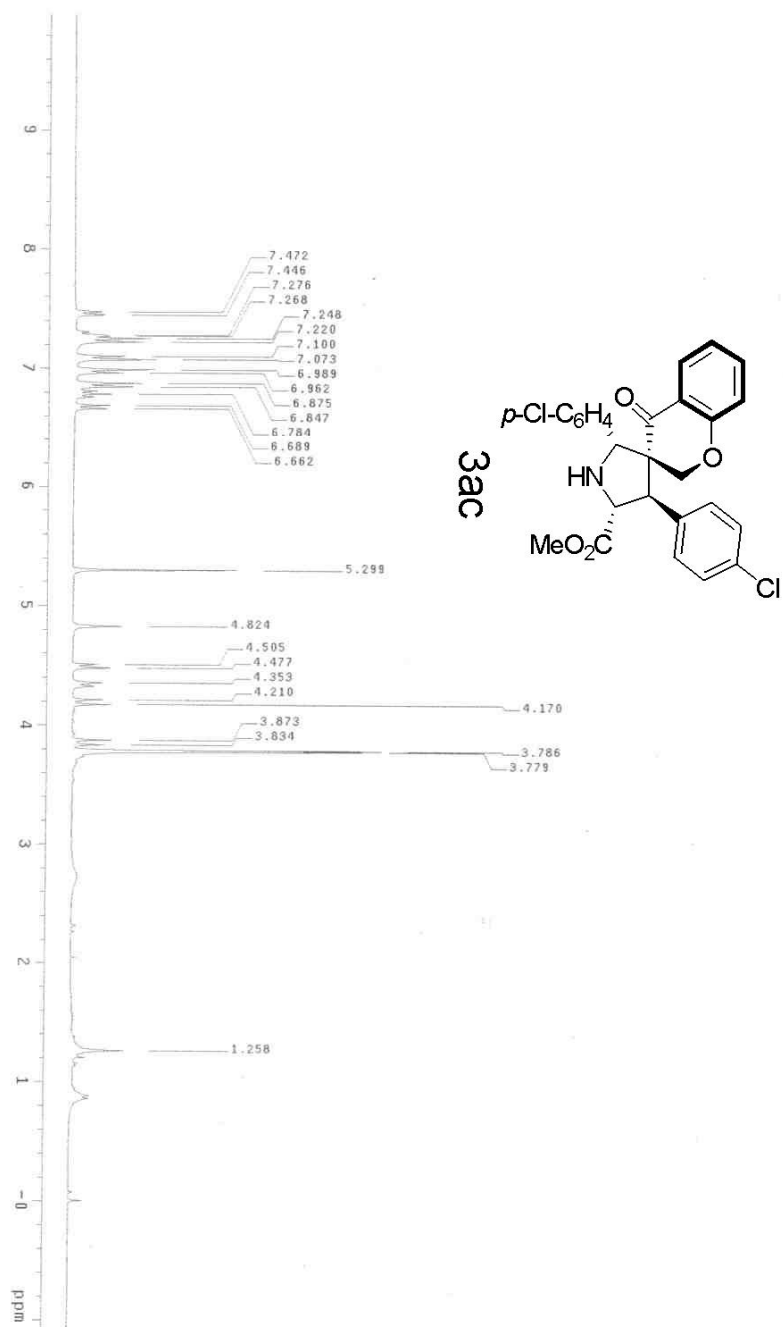

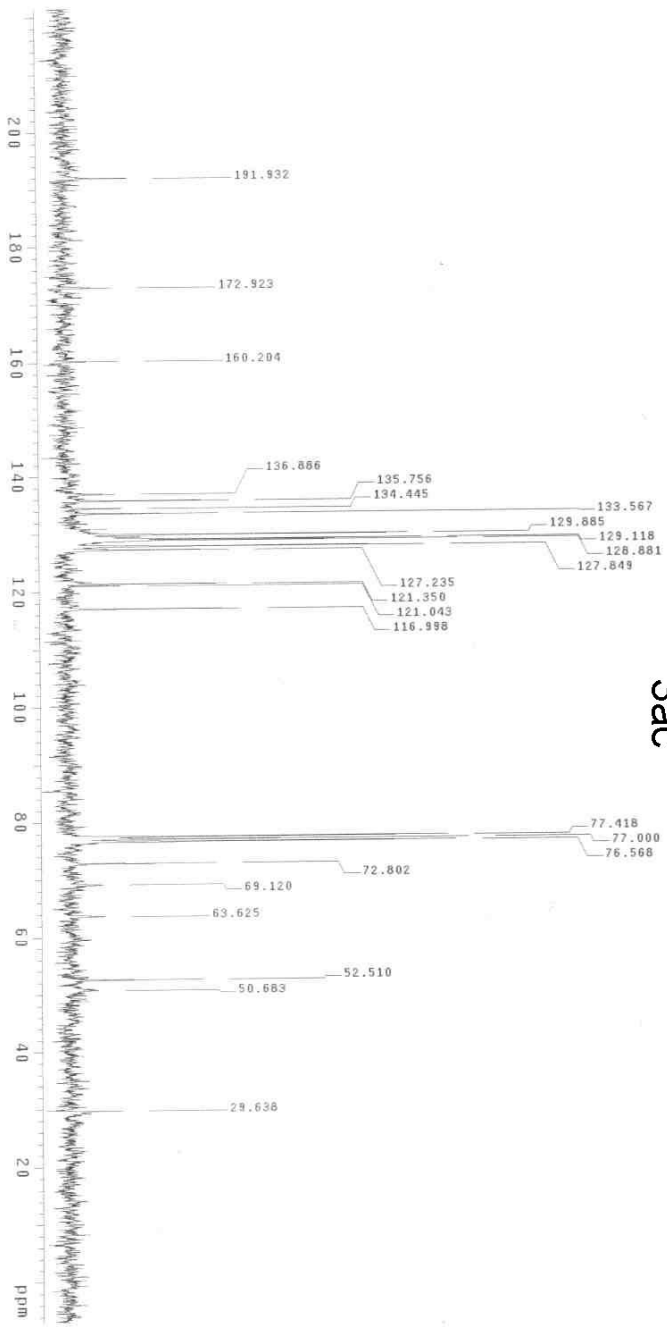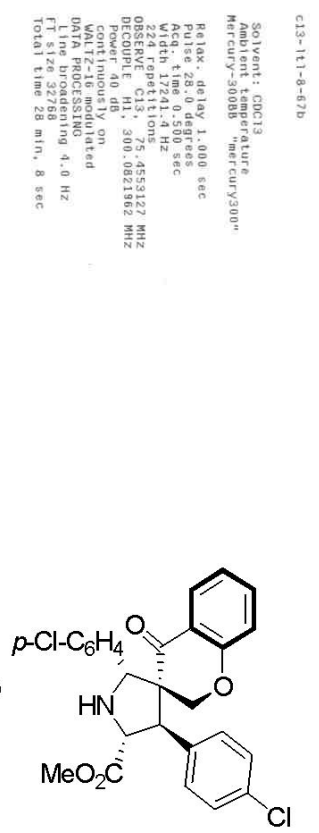



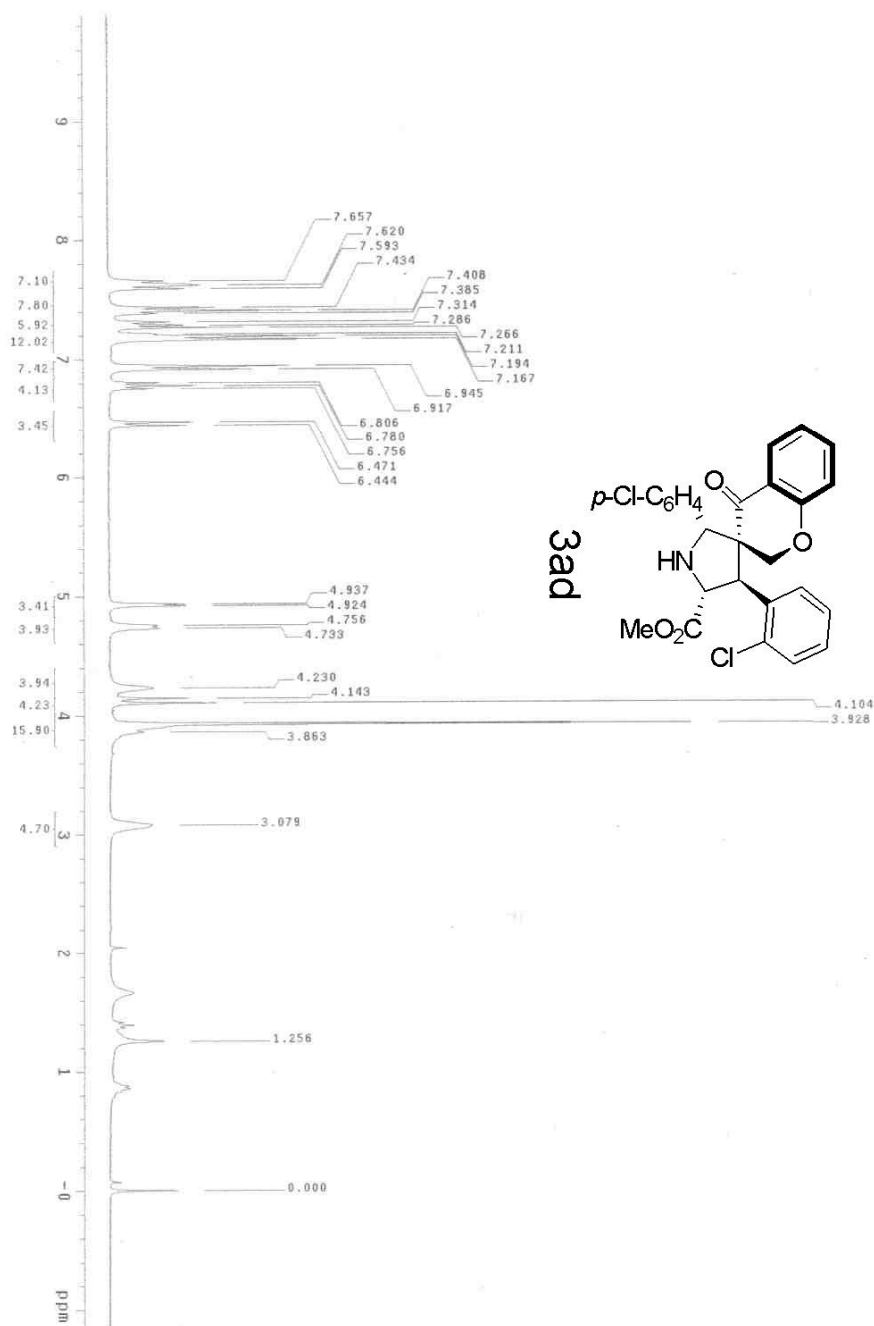

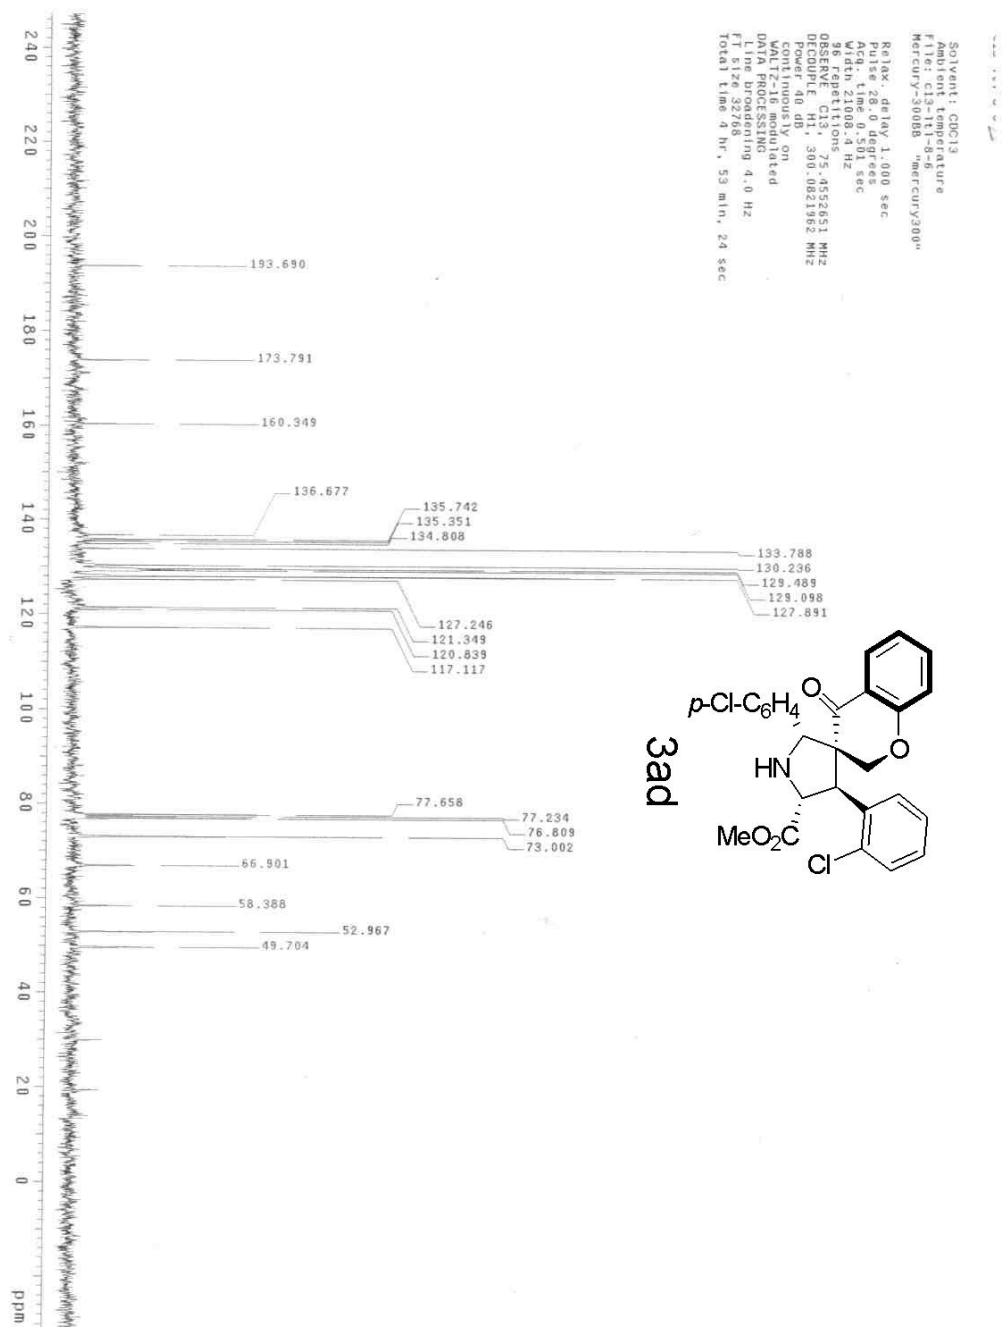

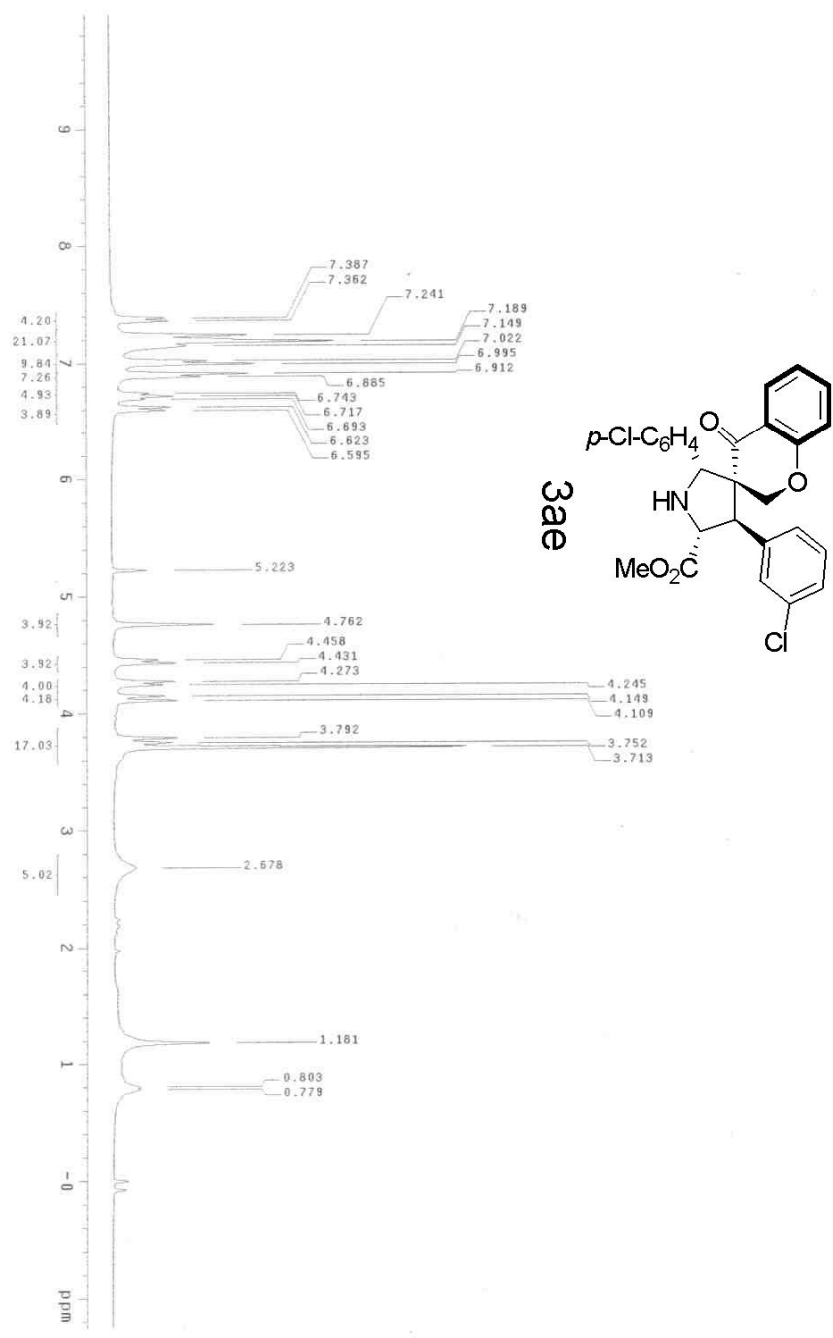

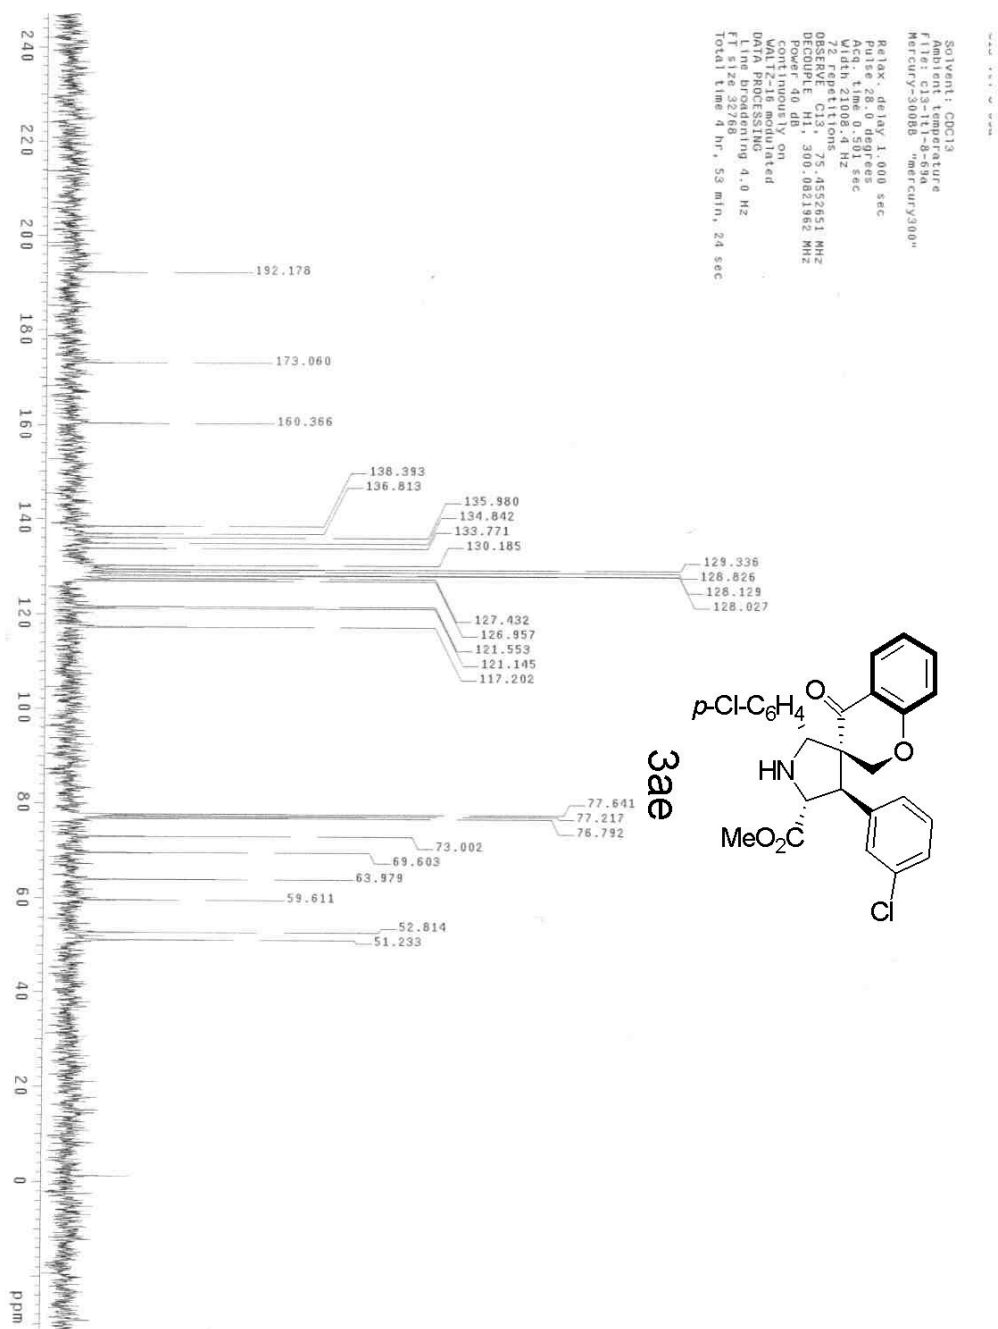

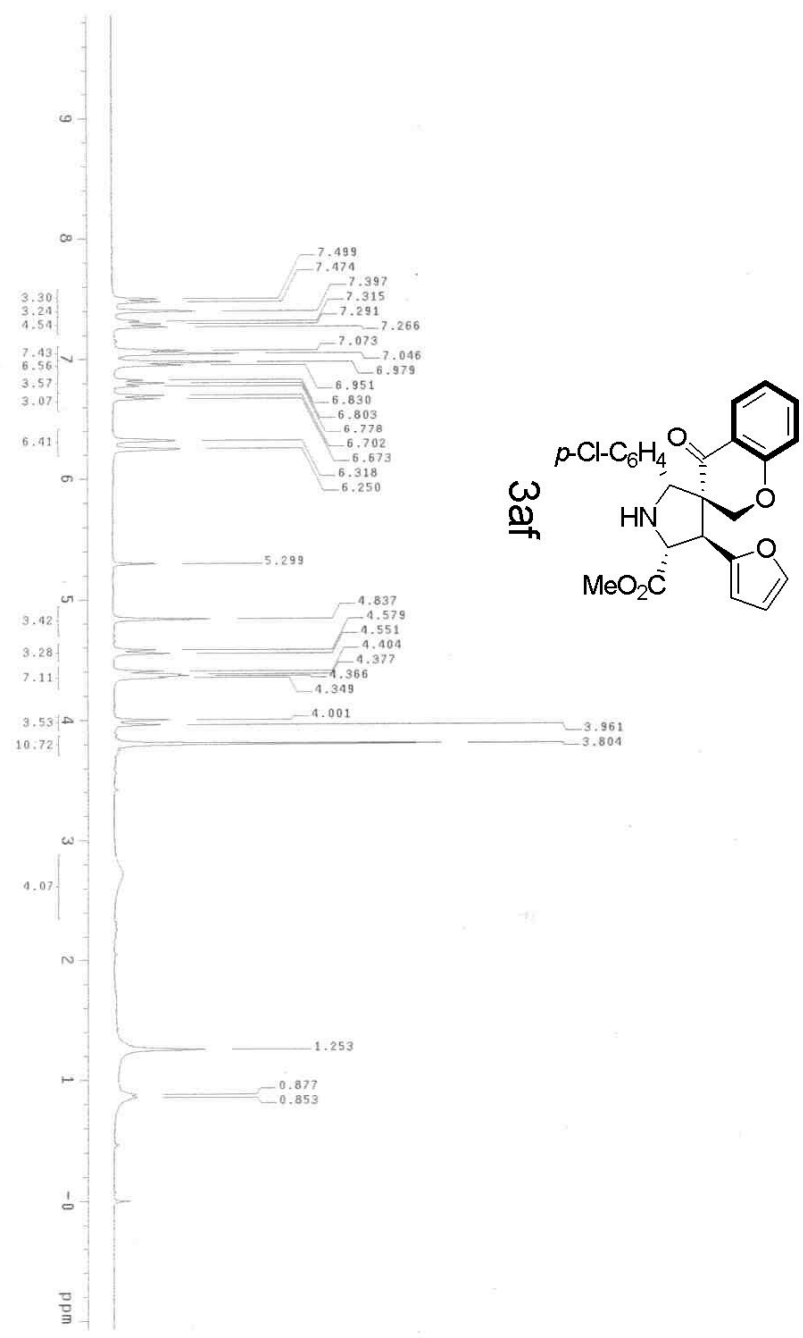

111-S-63A-1

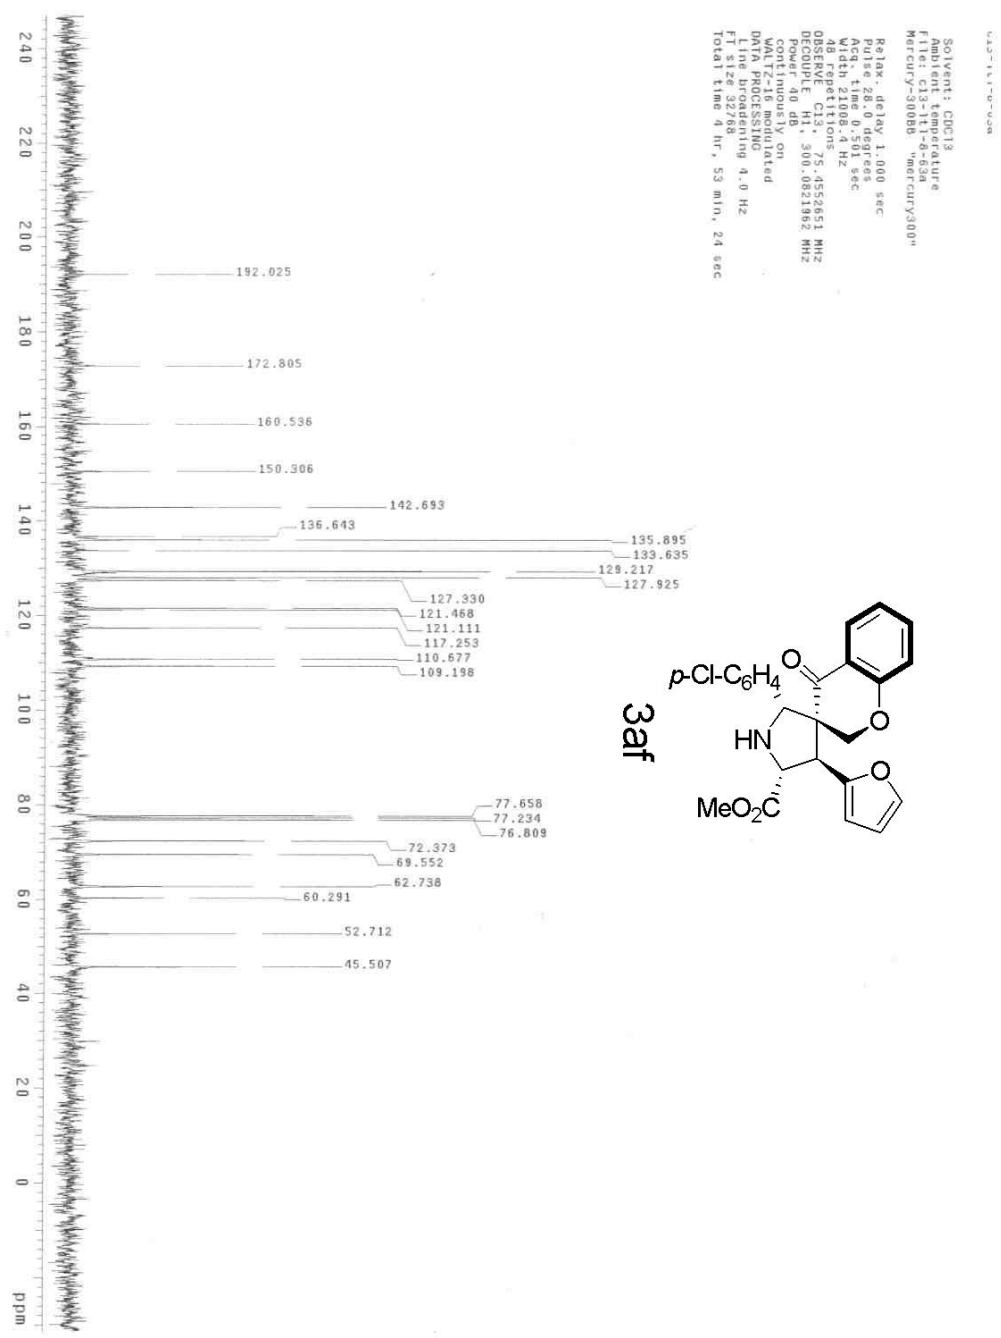

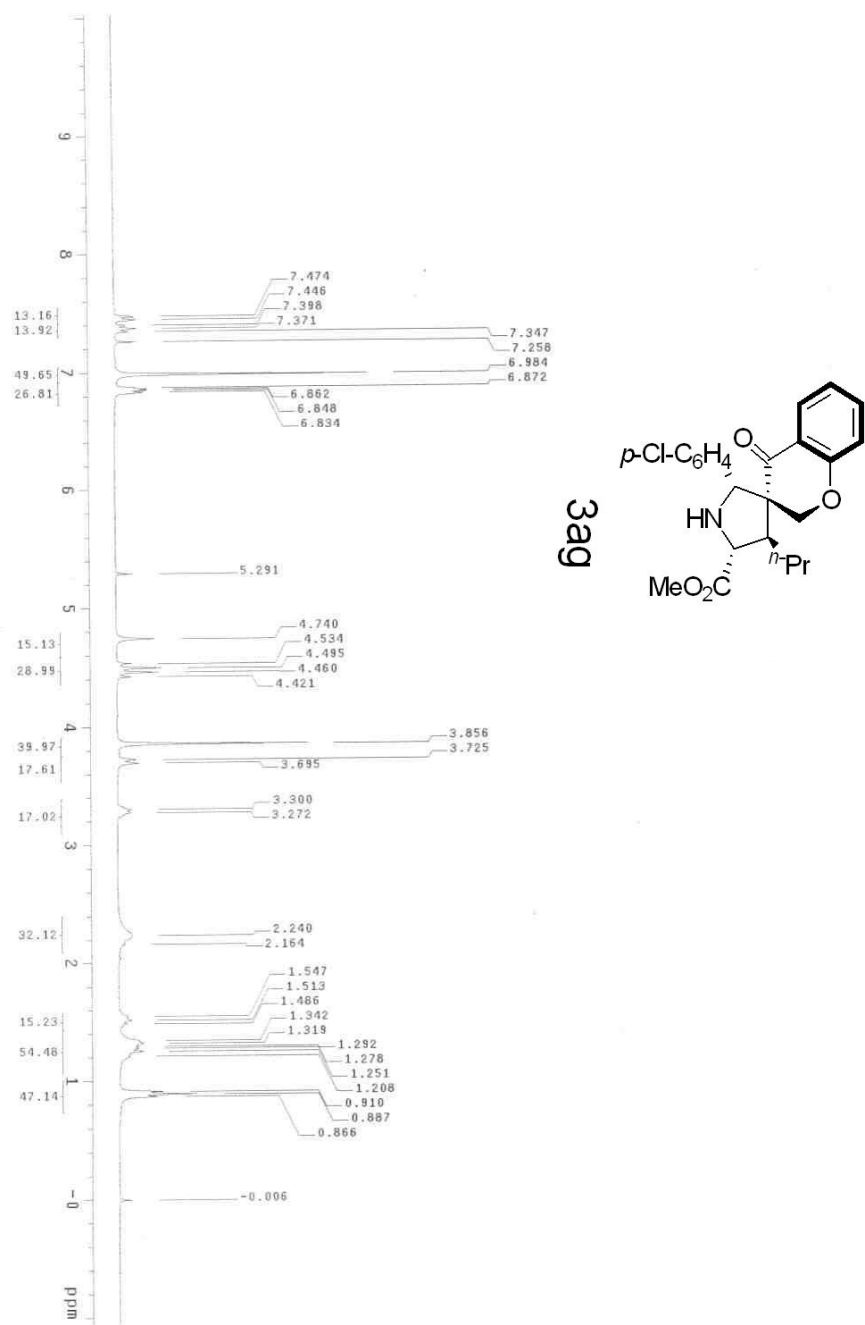

131-11-288-1

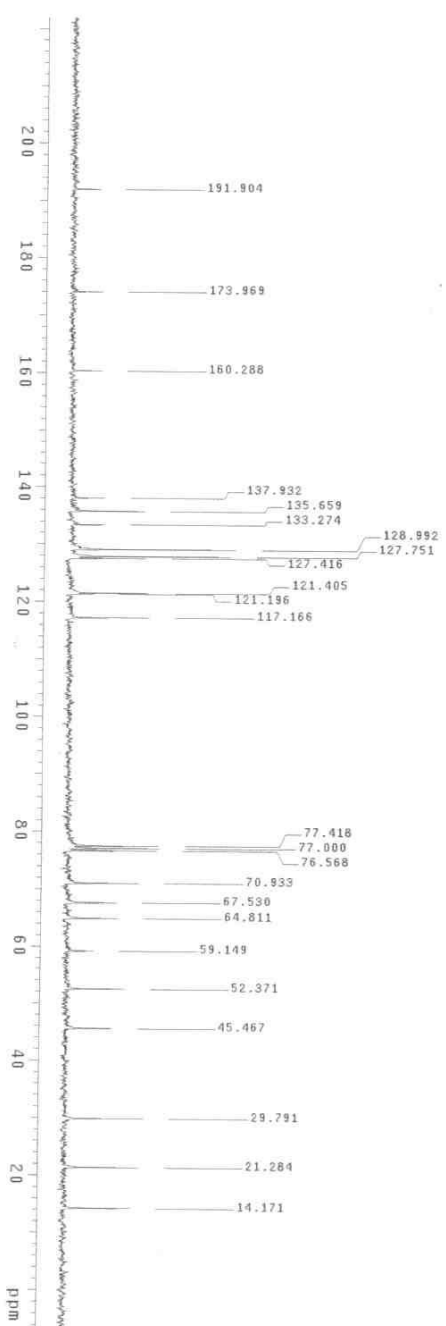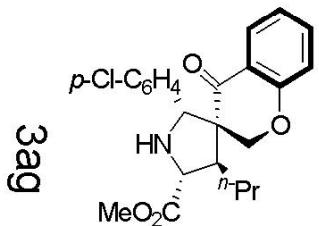

CDCl<sub>3</sub>-11-29a  
Solvent: CDCl<sub>3</sub>  
Ambient temperature  
Mercury-30008 "mercury300"  
Relax delay 1.000 sec  
Pulse 20.000 sec  
Acq. time 0.501 sec  
Width 17241.4 Hz  
200 repetitions  
0.000 sec  
DECOUPLE H1, 300.0821862 MHz  
Power 40 dB  
continuously on  
WALTZ-16 modulated  
D1 2.000 sec  
Line broadening 4.0 Hz  
FT size 32768  
Total time 2 hr, 24 min, 8 sec



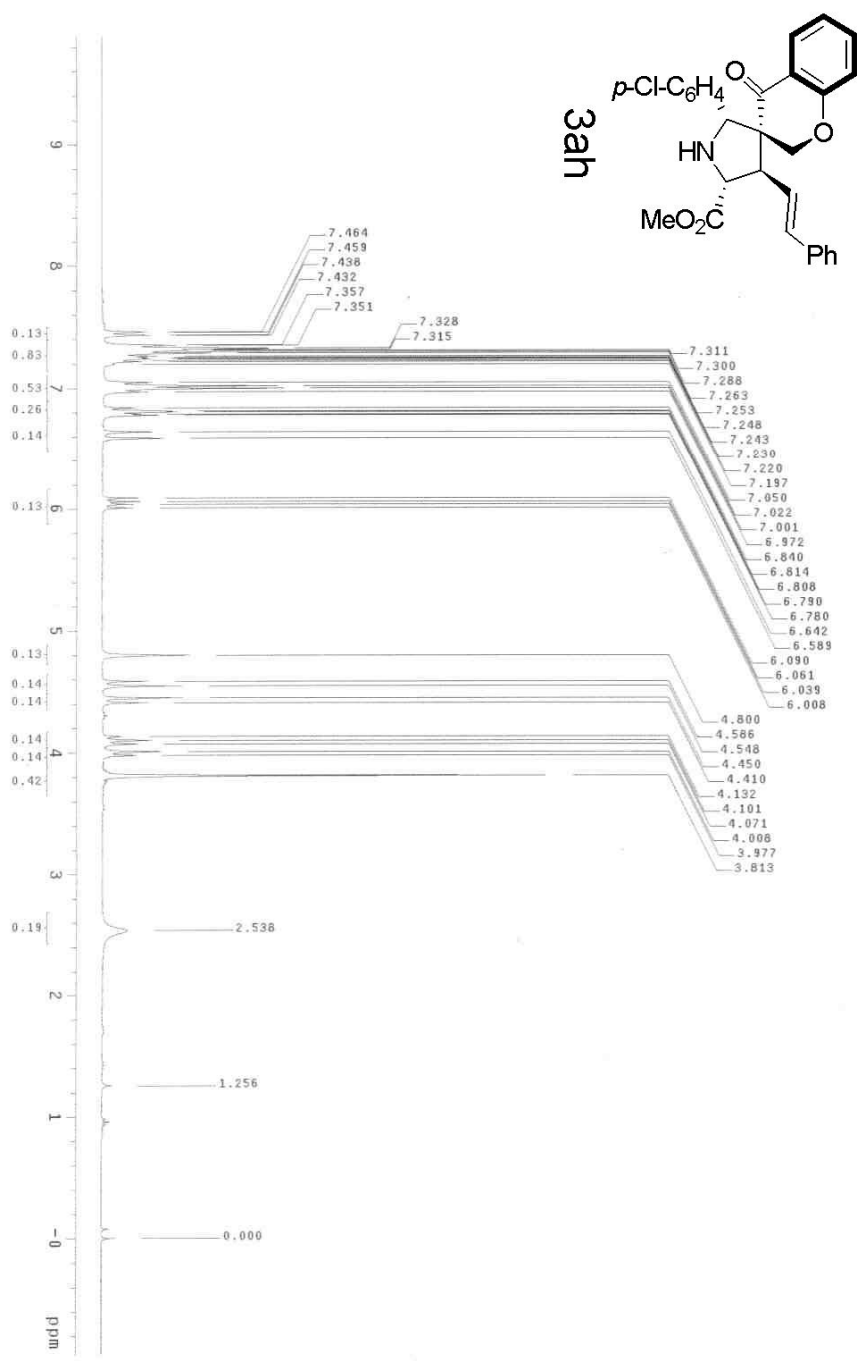

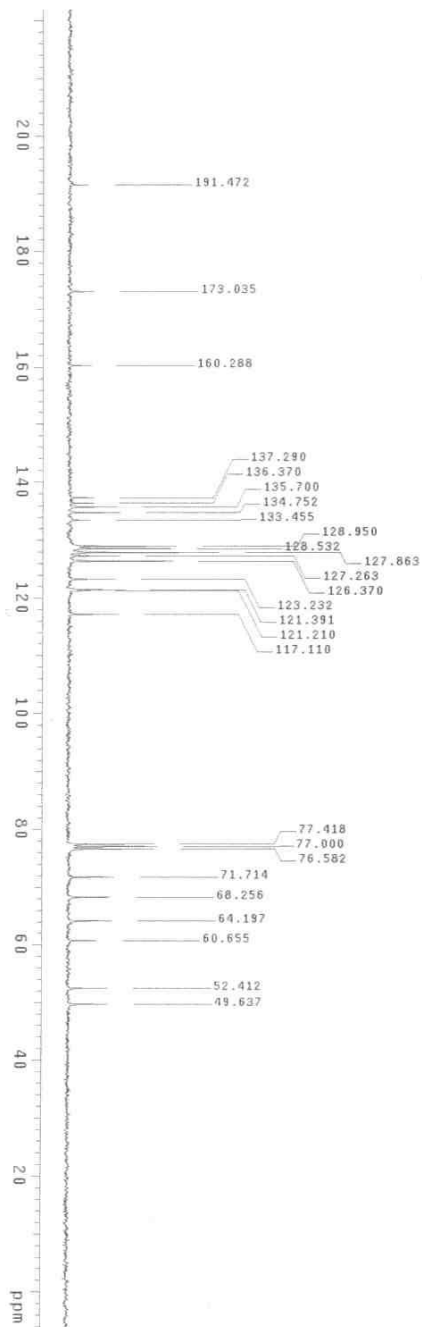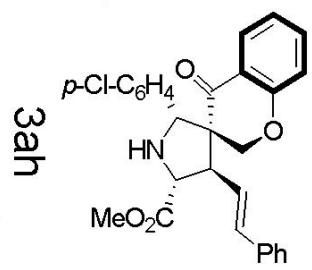

CDCl<sub>3</sub> - 15-11-196  
Solvent: CDCl<sub>3</sub>  
Ambient temperature  
Mercury-300SB "mercury300"  
Pulse delay 1.000 sec  
Pulse 28.0 degrees  
Acq. time 0.501 sec  
Width 17241.4 Hz  
256 repetitions 5.455291 MHz  
OBSERVED C13 300.0821962 MHz  
DECOUPLE H1 300.0821962 MHz  
Power 40 dB  
continuously on  
DATA ACQUISITION  
DATA PROCESSING  
Line broadening 4.0 Hz  
FT size 32768  
Total time 2 hr, 24 min, 8 sec

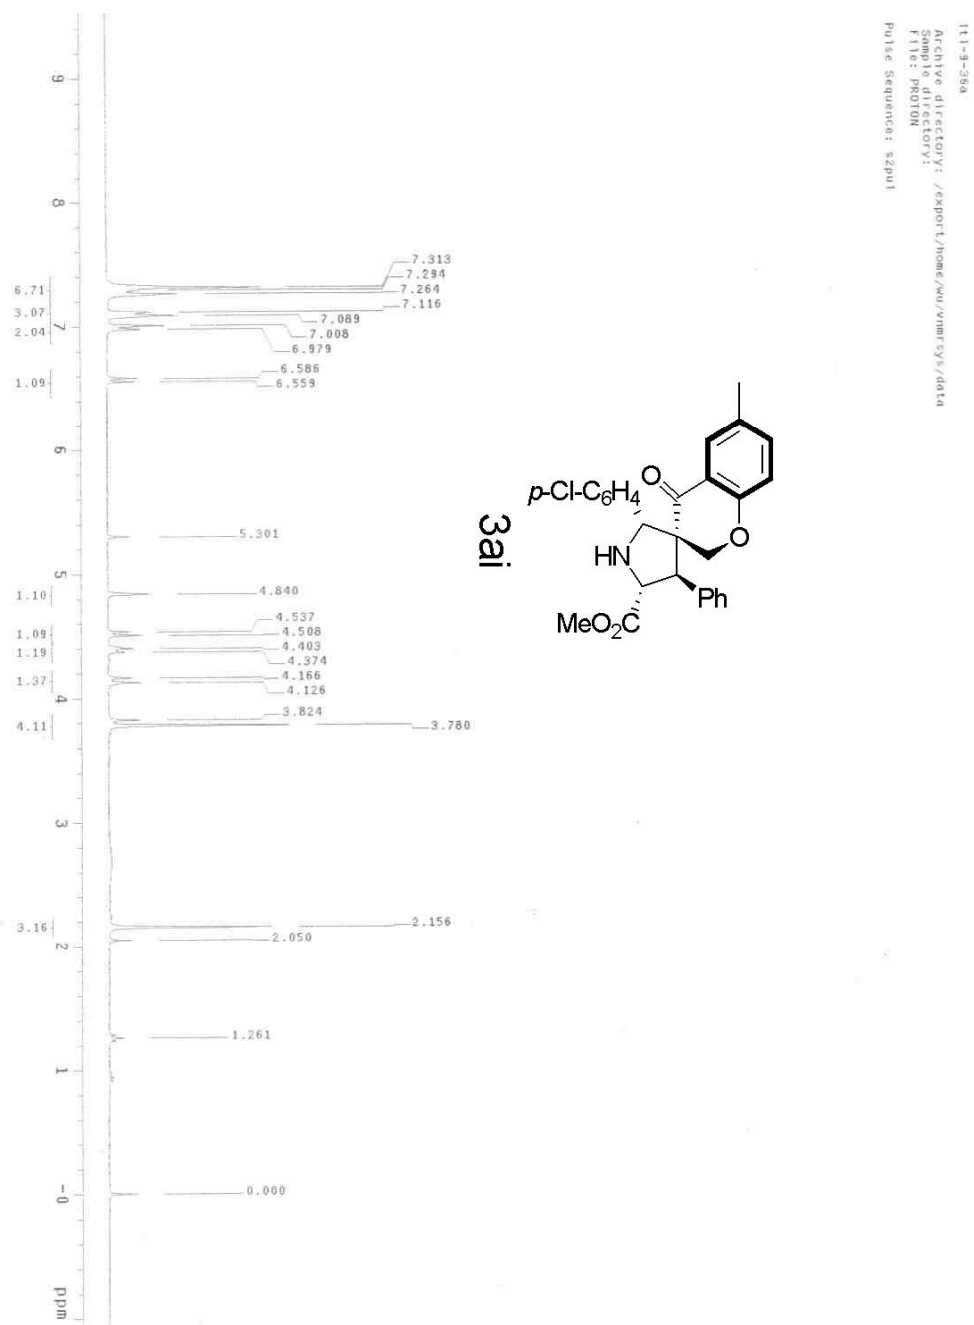

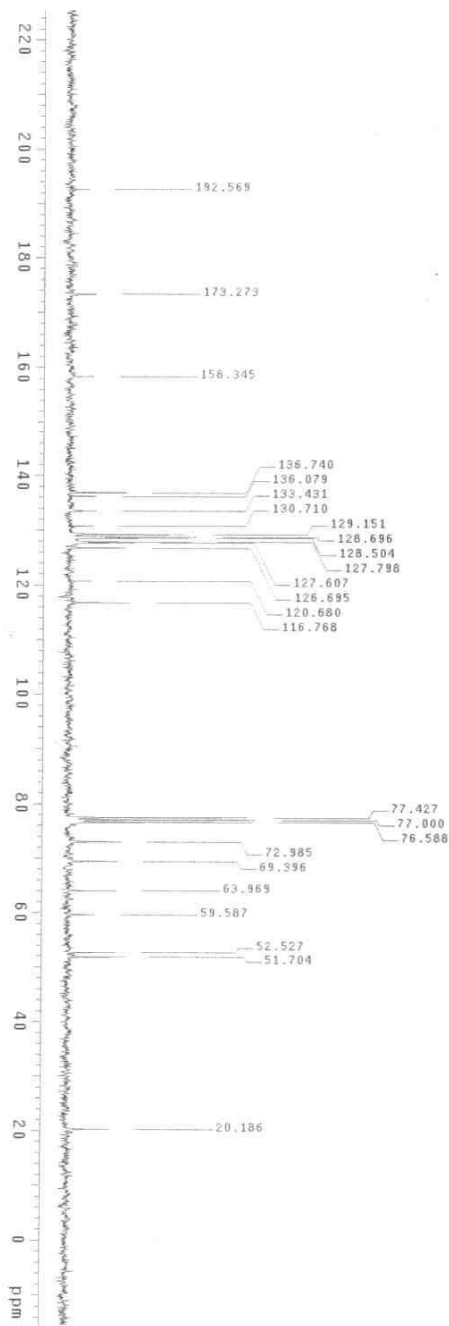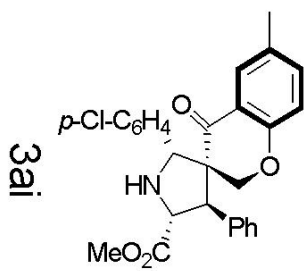

cd3-cl-9-36a  
Archive directory: /export/home/nj/ymr/sy/data  
Sample directory:  
Filter: ORIGIN  
Pulse Sequence: zgpg30  
Solvent: CDCl<sub>3</sub>  
Ambient temperature  
Mercury-3000B "mercury300"  
Relax delay 1.000 sec  
Pulse program zgpg30  
Acq time 0.500 sec  
Width 18181.8 Hz  
128 repetitions  
OBSERVE C13, 75.452349 MHz  
OBSERVE H1, 500.061362 MHz  
Power 40 dB  
continuously on  
WALTZ-16 modulated  
DATA PROCESSING  
F2 size 32768  
Total time 1 hr, 27 min, 30 sec

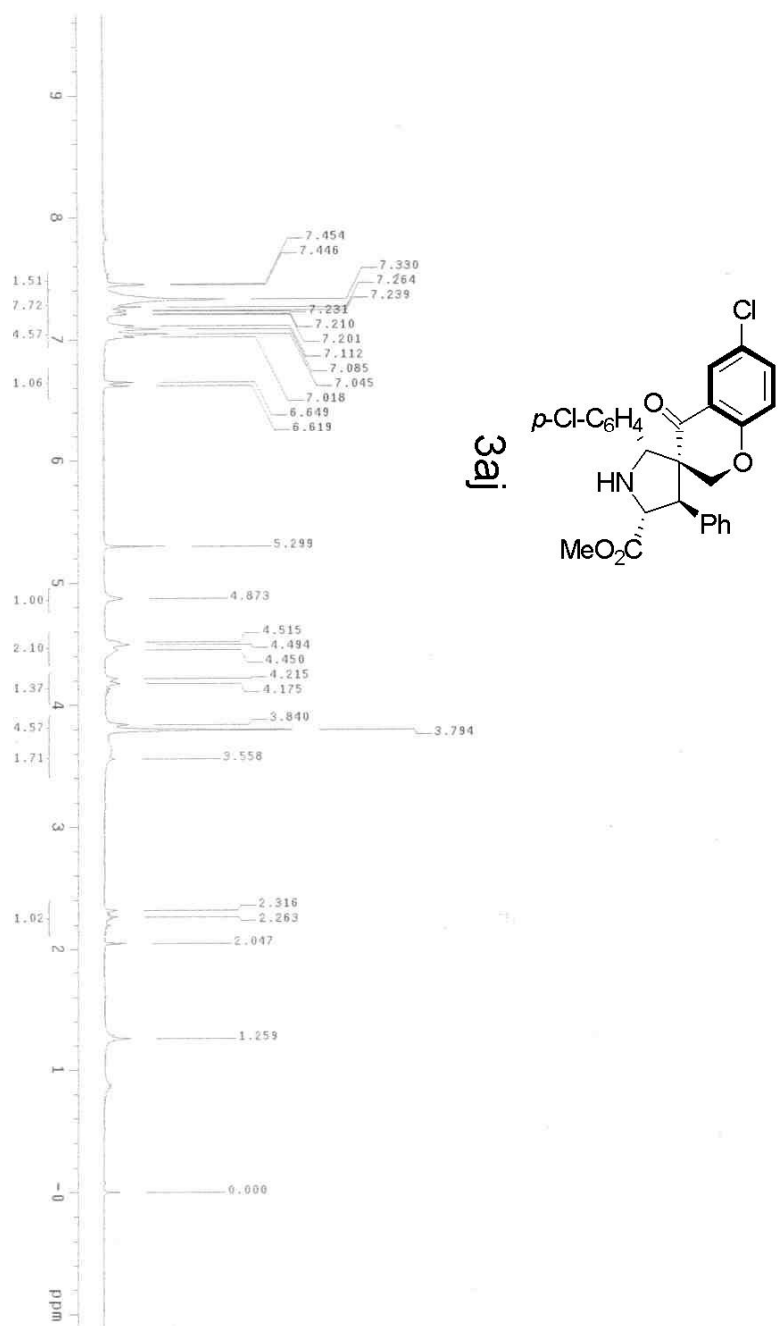

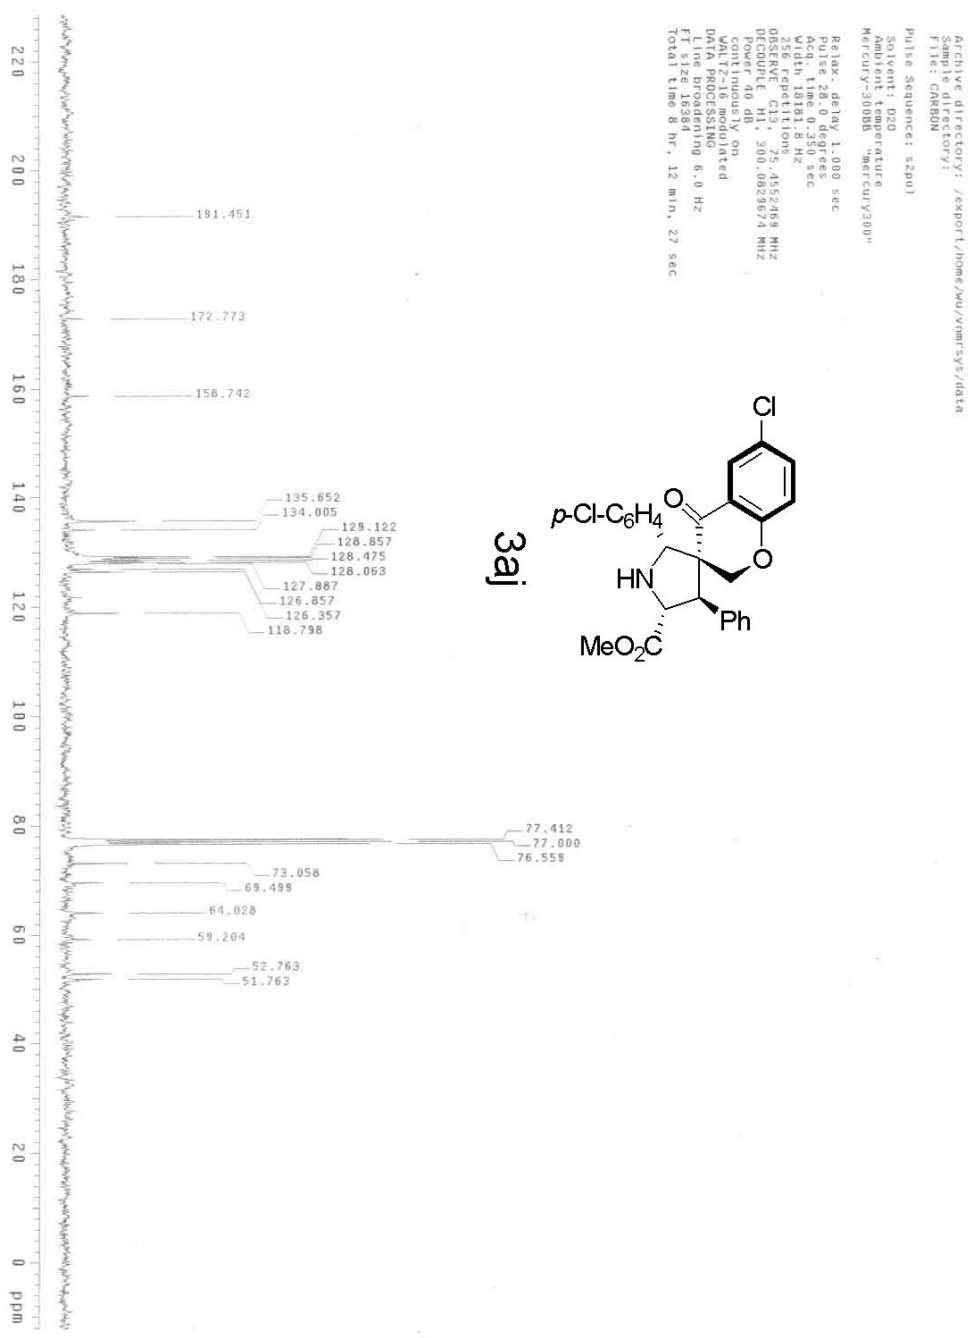

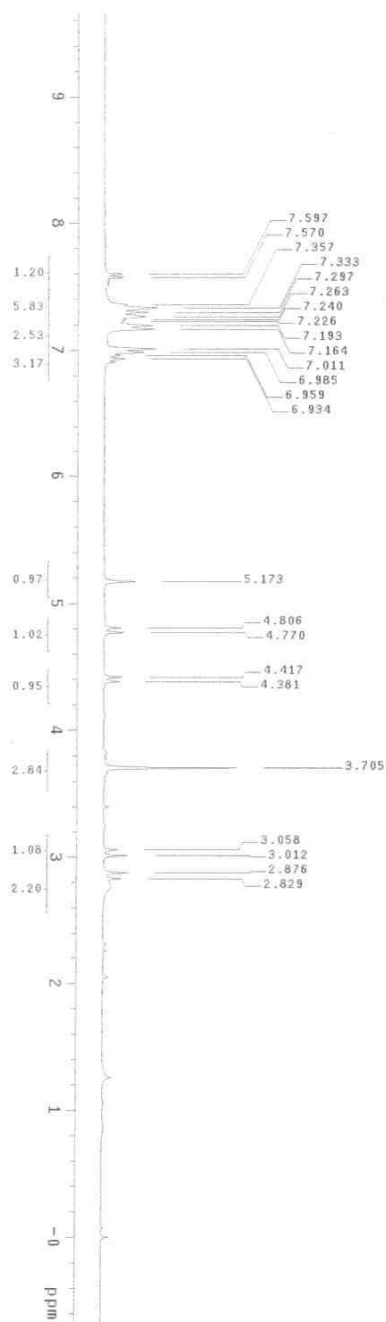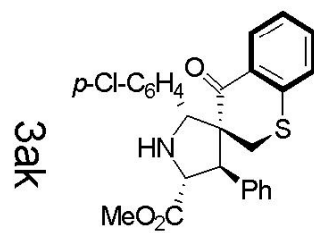

Archive directory: /export/home/nu/ymf/sys/data  
Sample directory:  
File: PROTON  
Pulse Sequence: zgpg30

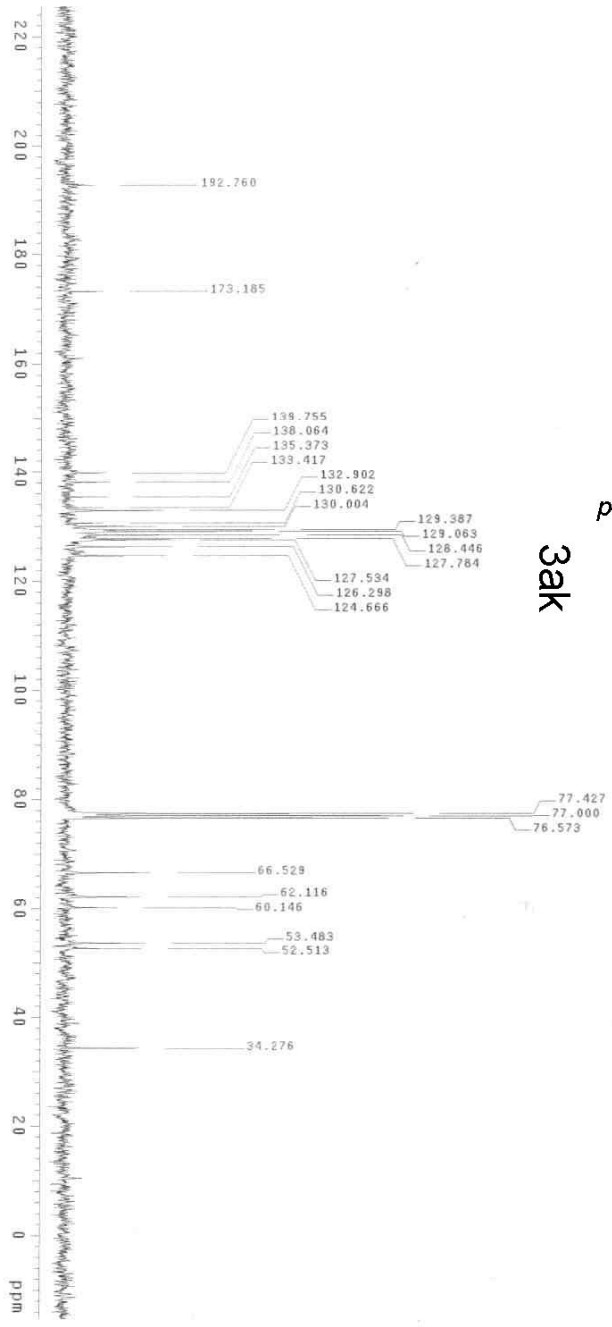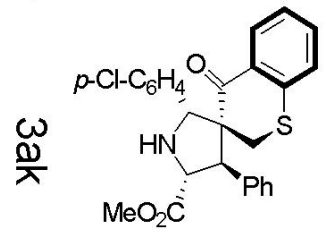

Archive directory: /export/home/vu/vnmr/sys/data  
Sample directory:  
File: CARBON  
Pulse Sequence: zgpg30  
Solvent: CDCl<sub>3</sub>  
Ambient temperature  
Mercury-300BB vnmrj300w  
Relax. delay: 1.000 sec  
Acq. time: 0.500 sec  
Width: 18181.8 Hz  
200 repetitions  
OBSERVE: C13, 5.455271 MHz  
P1: 12.00 dB, 300.0621502 MHz  
Power: 40 dB  
Continuously on  
WALTZ-16 modulated  
DATA PROCESSING: 4.0 Hz  
Spectrum processing  
FT size: 32768  
Total time: 1 hr, 27 min, 30 sec



数据文件: F:\HPLC\DATA\LTL-3-48-50\LTL-3-48-50-220 2009-11-15 19-05-12\SIG1000002.D  
样品名称: LTL-3-48

=====

|      |                                                                                                                 |      |          |
|------|-----------------------------------------------------------------------------------------------------------------|------|----------|
| 操作者  | : DXQ                                                                                                           | 序列行  | : 2      |
| 仪器   | : Instrument 1                                                                                                  | 位置   | : 样品瓶 12 |
| 进样日期 | : 2009-11-16 12:07:29 下午                                                                                        | 进样次数 | : 1      |
|      |                                                                                                                 | 进样量  | : 5 µl   |
| 采集方法 | : D:\LC\LTL\data\LTL-3-48-50\LTL-3-48-50-220 2009-11-15 19-05-12\ASH-10-90-10ML-220NM-60MIN.M                   |      |          |
| 最后修改 | : 2009-11-16 10:41:50 上午 : DXQ                                                                                  |      |          |
| 分析方法 | : F:\HPLC\DATA\LTL-3-48-50\LTL-3-48-50-220 2009-11-15 19-05-12\SIG1000002.D\DA.M (ASH-10-90-10ML-220NM-60MIN.M) |      |          |
| 最后修改 | : 2011-1-24 10:54:02 下午                                                                                         |      |          |

(调用后修改)

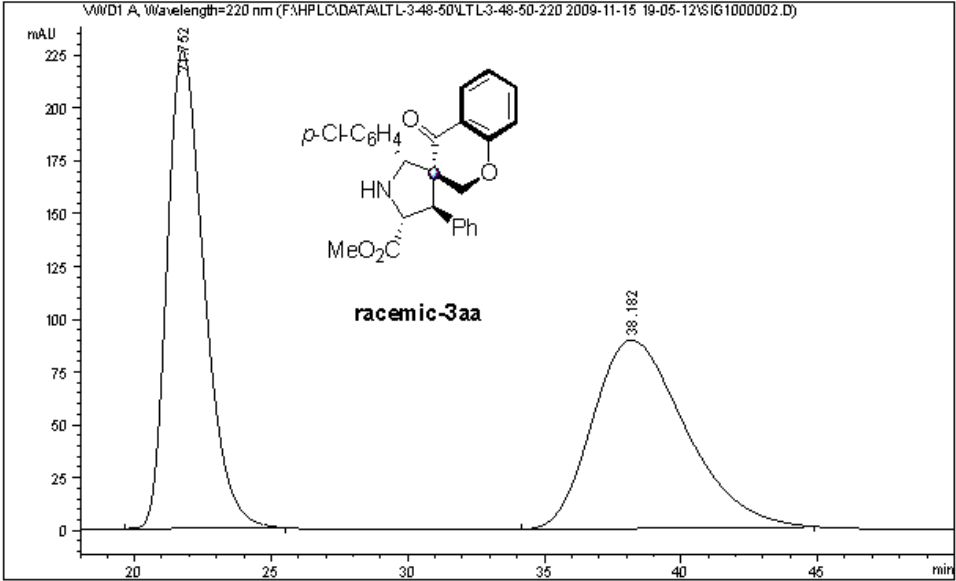

=====

面积百分比报告

=====

峰序 : 信号  
乘积因子 : 1.0000  
稀释因子 : 1.0000  
内标使用乘积因子和稀释因子

信号 1: VWD1 A, Wavelength=220 nm

| 峰 #  | 保留时间 [min] | 类型 | 峰宽 [min] | 峰面积 mAU *s | 峰高 [mAU]  | 峰面积 %   |
|------|------------|----|----------|------------|-----------|---------|
| 1    | 21.752     | BB | 1.4485   | 2.13104e4  | 226.52090 | 50.1892 |
| 2    | 38.182     | BB | 3.2848   | 2.11498e4  | 89.33236  | 49.8108 |
| 总量 : |            |    |          | 4.24602e4  | 315.85326 |         |

=====

\*\*\* 报告结束 \*\*\*

Data File D:\LC\LTL\DATE\LTL-8-44\LTL-8-44 2010-11-15 16-27-54\070-0301.D  
Sample Name: LTL-8-44B

=====

|                 |                         |            |           |
|-----------------|-------------------------|------------|-----------|
| Acq. Operator   | : DXQ                   | Seq. Line  | : 3       |
| Acq. Instrument | : Instrument 1          | Location   | : Vial 70 |
| Injection Date  | : 11/15/2010 5:32:04 PM | Inj        | : 1       |
|                 |                         | Inj Volume | : 5 µl    |

Acq. Method : D:\LC\LTL\DATE\LTL-8-44\LTL-8-44 2010-11-15 16-27-54\ASH-10-90-1ML-220NM-50MIN.M

Last changed : 8/30/2010 8:44:32 AM by LTL

Analysis Method : D:\LC\LTL\DATE\LTL-8-44\LTL-8-44 2010-11-15 16-27-54\070-0301.D\DA.M (ASH-10-90-1ML-220NM-50MIN.M)

Last changed : 11/19/2010 2:37:26 PM by THL  
(modified after loading)

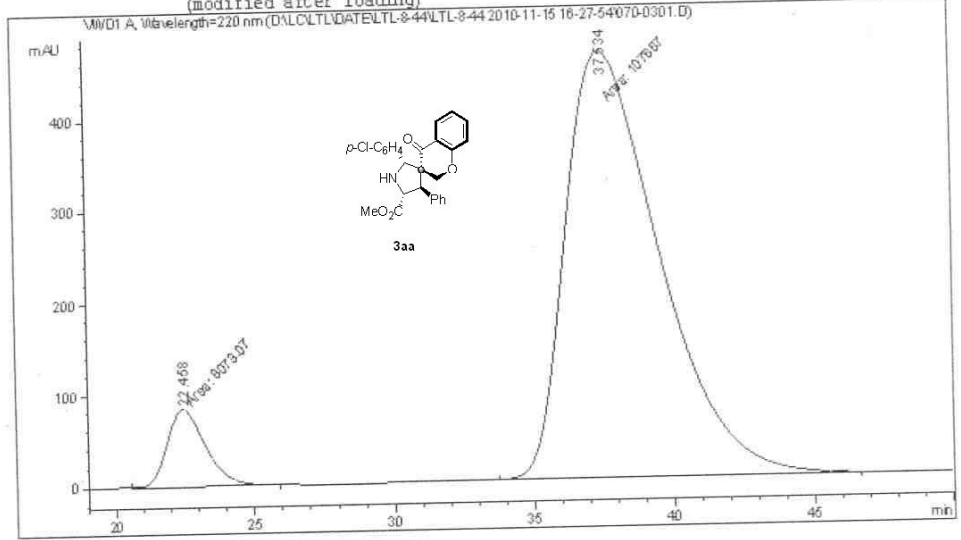

Area Percent Report

Sorted By : Signal  
Multiplier : 1.0000  
Dilution : 1.0000  
Use Multiplier & Dilution Factor with ISTDs

Signal 1: VMD1 A, Wavelength=220 nm

| Peak #   | RetTime [min] | Type | Width [min] | Area mAU *s | Height [mAU] | Area %  |
|----------|---------------|------|-------------|-------------|--------------|---------|
| 1        | 22.458        | MM   | 1.6156      | 8073.06641  | 83.28065     | 6.9752  |
| 2        | 37.534        | MM   | 3.8536      | 1.07667e5   | 465.64847    | 93.0248 |
| Totals : |               |      |             | 1.15740e5   | 548.92912    |         |

Instrument 1 11/19/2010 2:37:31 PM THL

Data File D:\LC\LTL\DATE\LTL-9-42\LTL-9-42A 2011-02-15 20-11-47\071-0201.D  
Sample Name: LTL-9-42A

=====

|                 |                        |            |           |
|-----------------|------------------------|------------|-----------|
| Acq. Operator   | : LTL                  | Seq. Line  | : 2       |
| Acq. Instrument | : Instrument 1         | Location   | : Vial 71 |
| Injection Date  | : 2/15/2011 8:24:04 PM | Inj        | : 1       |
|                 |                        | Inj Volume | : 5 µl    |

Acq. Method : D:\LC\LTL\DATE\LTL-9-42\LTL-9-42A 2011-02-15 20-11-47\ADH-30-70-1ML-220NM-70MIN.M

Last changed : 2/15/2011 10:56:36 AM by LTL

Analysis Method : D:\LC\LTL\DATE\LTL-9-42\LTL-9-42A 2011-02-15 20-11-47\071-0201.D\DA.M (ADH-30-70-1ML-220NM-70MIN.M)

Last changed : 2/16/2011 10:27:14 AM by LTL  
(modified after loading)

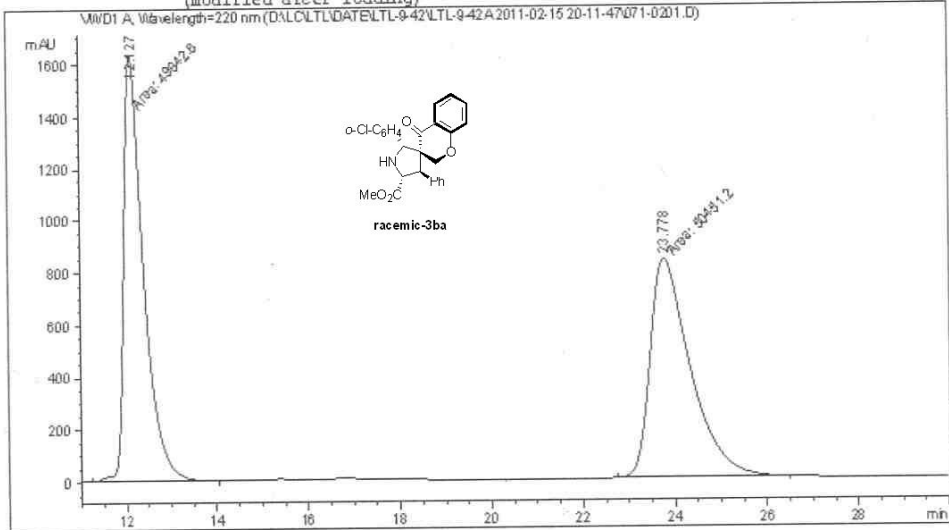

=====  
Area Percent Report  
=====

Sorted By : Signal  
Multiplier : 1.0000  
Dilution : 1.0000  
Use Multiplier & Dilution Factor with ISTDs

Signal 1: VWD1 A, Wavelength=220 nm

| Peak # | RetTime [min] | Type | Width [min] | Area mAU  | Height [mAU] | Area %  |
|--------|---------------|------|-------------|-----------|--------------|---------|
| 1      | 12.127        | NM   | 0.5095      | 4.98426e4 | 1630.31836   | 49.6966 |
| 2      | 23.778        | NM   | 1.0098      | 5.04512e4 | 832.65930    | 50.3034 |

Totals : 1.00294e5 2462.97766

=====  
Instrument 1 2/16/2011 10:27:18 AM LTL

Page 1 of 1

Data File D:\LC\LTL\DATE\LTL-9-41\LTL-9-41B 2011-02-16 10-32-03\062-0301.D  
Sample Name: LTL-9-42B

```
=====
Acq. Operator   : LTL                               Seq. Line :    3
Acq. Instrument : Instrument 1                       Location  : Vial 62
Injection Date  : 2/16/2011 11:31:21 AM              Inj       :    1
                                                    Inj Volume: 5 µl
Acq. Method     : D:\LC\LTL\DATE\LTL-9-41\LTL-9-41B 2011-02-16 10-32-03\ADH-30-70-1ML-220NM-30MIN.M
Last changed    : 1/22/2011 10:59:12 AM by THL-7-95-97
Analysis Method : D:\LC\LTL\DATE\LTL-9-41\LTL-9-41B 2011-02-16 10-32-03\062-0301.D\DA.M (
                  ADH-30-70-1ML-220NM-30MIN.M)
Last changed    : 2/16/2011 2:45:55 PM by LTL
                  (modified after loading)
=====
```

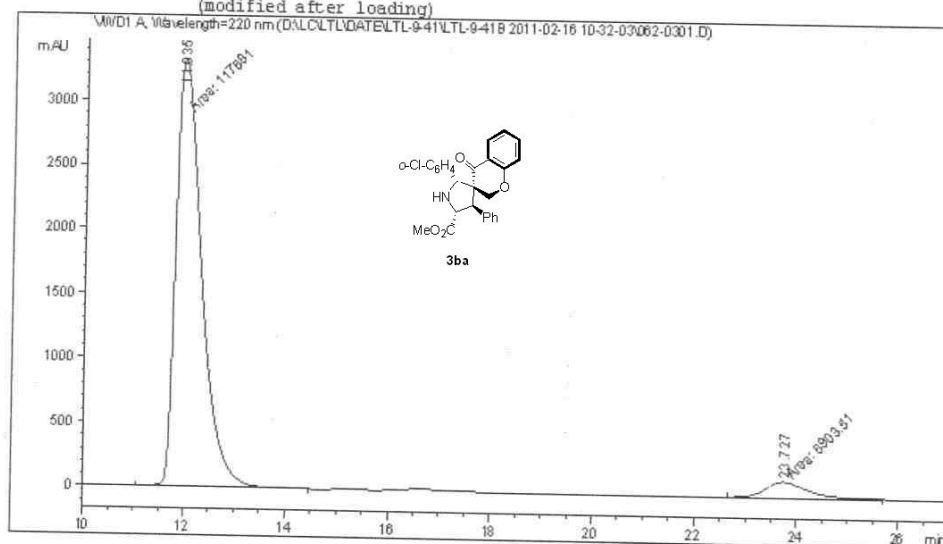

Area Percent Report

```
=====
Sorted By      :      Signal
Multiplier     :      1.0000
Dilution       :      1.0000
Use Multiplier & Dilution Factor with ISTDs
=====
```

Signal 1: VM01 A, Wavelength=220 nm

| Peak # | RetTime [min] | Type | Width [min] | Area mAU   | Height [mAU] | Area %  |
|--------|---------------|------|-------------|------------|--------------|---------|
| 1      | 11.935        | MM   | 0.5926      | 1.17681e5  | 3309.99829   | 94.4588 |
| 2      | 23.727        | MM   | 0.9442      | 6903.51270 | 121.86088    | 5.5412  |

Totals : 1.24584e5 3431.85917

Instrument 1 2/16/2011 2:45:59 PM LTL

Page 1 of 1

Data File D:\LC\RTL\DATE\RTL-11-28\RTL-11-28 2011-06-09 12-10-08\061-0201.D  
Sample Name: RTL-9-41A

=====

|                 |                        |            |           |
|-----------------|------------------------|------------|-----------|
| Acq. Operator   | : LTL                  | Seq. Line  | : 2       |
| Acq. Instrument | : Instrument 1         | Location   | : Vial 61 |
| Injection Date  | : 6/9/2011 12:22:48 PM | Inj        | : 1       |
|                 |                        | Inj Volume | : 5 µl    |

Acq. Method : D:\LC\RTL\DATE\RTL-11-28\RTL-11-28 2011-06-09 12-10-08\ADH-30-70-1ML-220NM-50MIN-NOT.M

Last changed : 6/9/2011 12:11:29 PM by hzl

Analysis Method : D:\LC\RTL\DATE\RTL-11-28\RTL-11-28 2011-06-09 12-10-08\061-0201.D\DA.M (ADH-30-70-1ML-220NM-50MIN-NOT.M)

Last changed : 6/13/2011 9:51:14 PM by LTL  
(modified after loading)

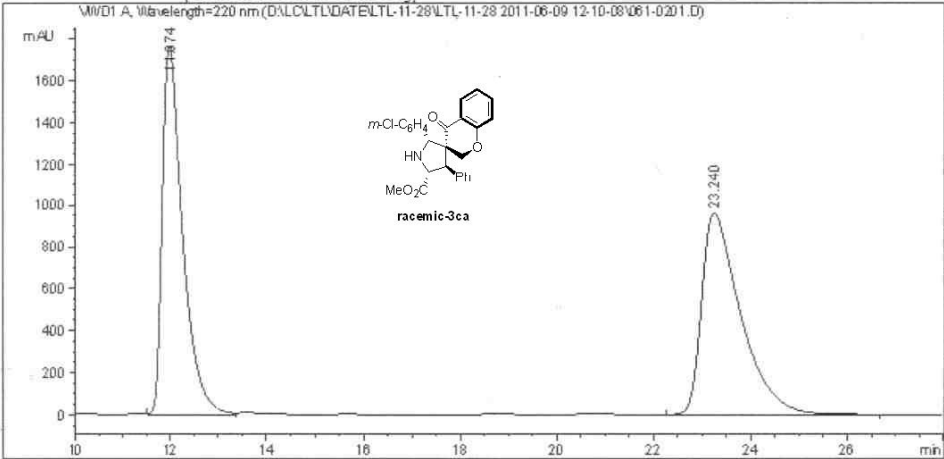

=====  
Area Percent Report  
=====

Sorted By : Signal  
Multiplier : 1.0000  
Dilution : 1.0000  
Use Multiplier & Dilution Factor with ISTDs

Signal 1: WVD1 A, Wavelength=220 nm

| Peak # | RetTime [min] | Type | Width [min] | Area mAU  | Height [mAU] | Area %  |
|--------|---------------|------|-------------|-----------|--------------|---------|
| 1      | 11.974        | VV   | 0.4413      | 5.22811e4 | 1766.84814   | 49.5387 |
| 2      | 23.240        | EE   | 0.8209      | 5.32548e4 | 959.32581    | 50.4613 |

Totals : 1.05536e5 2726.17395

=====  
\*\*\* End of Report \*\*\*

Data File D:\LC\LTL\DATE\LTL-11-28\LTL-11-28 2011-06-09 12-10-08\062-0301.D  
Sample Name: LTL-11-28A

=====

|                 |                       |            |           |
|-----------------|-----------------------|------------|-----------|
| Acq. Operator   | : LTL                 | Seq. Line  | : 3       |
| Acq. Instrument | : Instrument 1        | Location   | : Vial 62 |
| Injection Date  | : 6/9/2011 1:14:36 PM | Inj        | : 1       |
|                 |                       | Inj Volume | : 5 µl    |

Acq. Method : D:\LC\LTL\DATE\LTL-11-28\LTL-11-28 2011-06-09 12-10-08\ADH-30-70-1ML-220NM-50MIN-NOT.M

Last changed : 6/9/2011 12:11:29 PM by hz1

Analysis Method : D:\LC\LTL\DATE\LTL-11-28\LTL-11-28 2011-06-09 12-10-08\062-0301.D\DA.M (ADH-30-70-1ML-220NM-50MIN-NOT.M)

Last changed : 6/13/2011 9:51:37 PM by LTL  
(modified after loading)

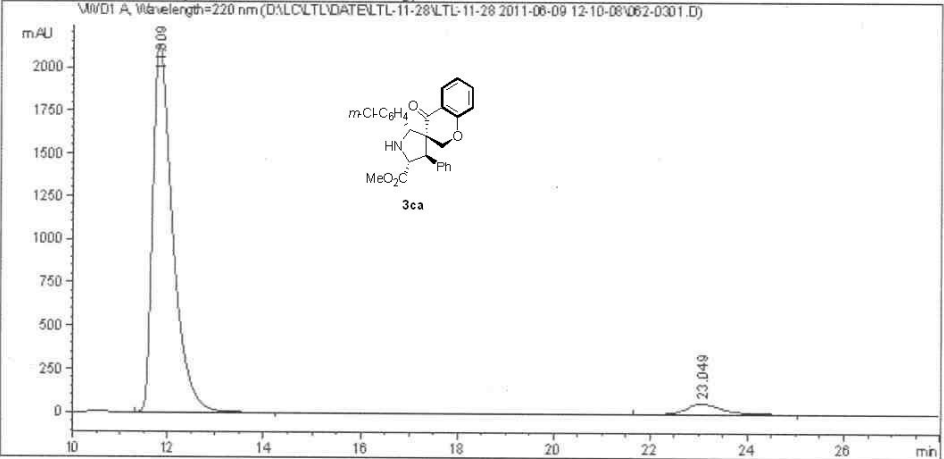

=====  
Area Percent Report  
=====

Sorted By : Signal  
Multiplier : 1.0000  
Dilution : 1.0000  
Use Multiplier & Dilution Factor with ISTDs

Signal 1: WWD1 A, Wavelength=220 nm

| Peak # | RetTime [min] | Type | Width [min] | Area mAU   | Height [mAU] | Area %  |
|--------|---------------|------|-------------|------------|--------------|---------|
| 1      | 11.809        | EB   | 0.4324      | 6.21266e4  | 2136.55786   | 95.2202 |
| 2      | 23.049        | EB   | 0.7556      | 3118.56201 | 61.55494     | 4.7798  |

Totals : 6.52451e4 2198.11280

=====  
\*\*\* End of Report \*\*\*  
=====

Data File D:\LC\LTLD\DATE\LTIL-8-53\LTIL-8-53A 2010-12-07 10-28-20\055-0201.D  
Sample Name: LTL-8-53A

=====

|                 |                         |            |           |
|-----------------|-------------------------|------------|-----------|
| Acq. Operator   | : THL                   | Seq. Line  | : 2       |
| Acq. Instrument | : Instrument 1          | Location   | : Vial 55 |
| Injection Date  | : 12/7/2010 10:40:48 AM | Inj        | : 1       |
|                 |                         | Inj Volume | : 5 µl    |

Acq. Method : D:\LC\LTLD\DATE\LTIL-8-53\LTIL-8-53A 2010-12-07 10-28-20\ADH-30-70-IML-220NM-80MIN.M

Last changed : 11/27/2010 11:06:07 AM by LTL

Analysis Method : D:\LC\LTLD\DATE\LTIL-8-53\LTIL-8-53A 2010-12-07 10-28-20\055-0201.D\DA.M (ADH-30-70-IML-220NM-80MIN.M)

Last changed : 12/7/2010 7:05:30 PM by THL  
(modified after loading)

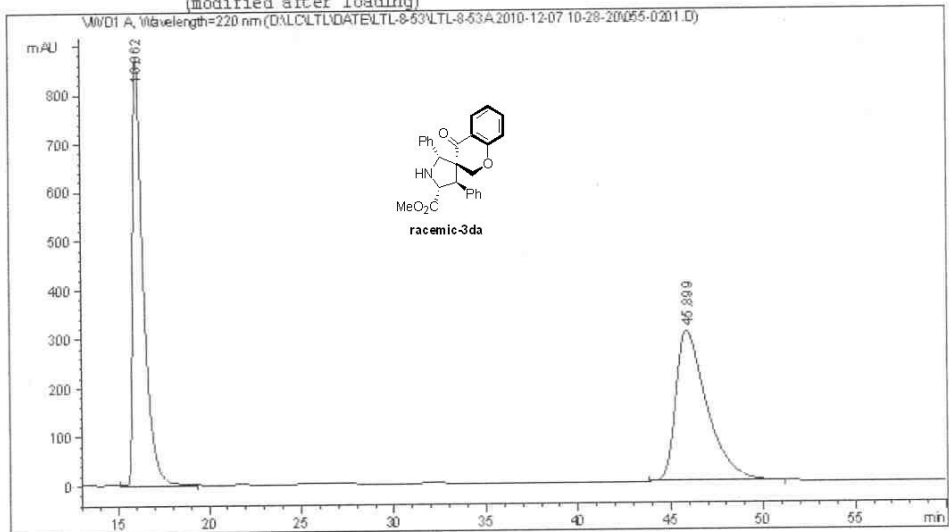

=====  
Area Percent Report  
=====

Sorted By : Signal  
Multiplier : 1.0000  
Dilution : 1.0000  
Use Multiplier & Dilution Factor with ISTDs

Signal 1: WWD1 A, Wavelength=220 nm

| Peak #   | RetTime [min] | Type | Width [min] | Area mAU  | Height [mAU] | Area %  |
|----------|---------------|------|-------------|-----------|--------------|---------|
| 1        | 16.062        | VB   | 0.6031      | 3.56487e4 | 873.00519    | 49.9184 |
| 2        | 45.899        | BB   | 1.7280      | 3.57653e4 | 307.55499    | 50.0816 |
| Totals : |               |      |             | 7.14140e4 | 1180.56018   |         |

Instrument 1 12/7/2010 7:05:34 PM THL

Page 1 of 1

Data File D:\LC\LTL\DATE\LTL-9-29\LTL-9-29A 2011-01-12 10-22-43\063-0201.D  
Sample Name: LTL-9-29A

```
=====
Acq. Operator   : thl                      Seq. Line :    2
Acq. Instrument : Instrument 1              Location  : Vial 63
Injection Date  : 1/12/2011 10:35:10 AM    Inj       :    1
                                           Inj Volume: 5 µl

Acq. Method     : D:\LC\LTL\DATE\LTL-9-29\LTL-9-29A 2011-01-12 10-22-43\ADH-30-70-1ML-220NM-
60MIN.M
Last changed    : 12/7/2010 3:06:41 PM by THL
Analysis Method : D:\LC\LTL\DATE\LTL-9-29\LTL-9-29A 2011-01-12 10-22-43\063-0201.D\DA.M (
ADH-30-70-1ML-220NM-60MIN.M)
Last changed    : 1/24/2011 4:53:15 PM by LTL
                (modified after loading)
=====
```

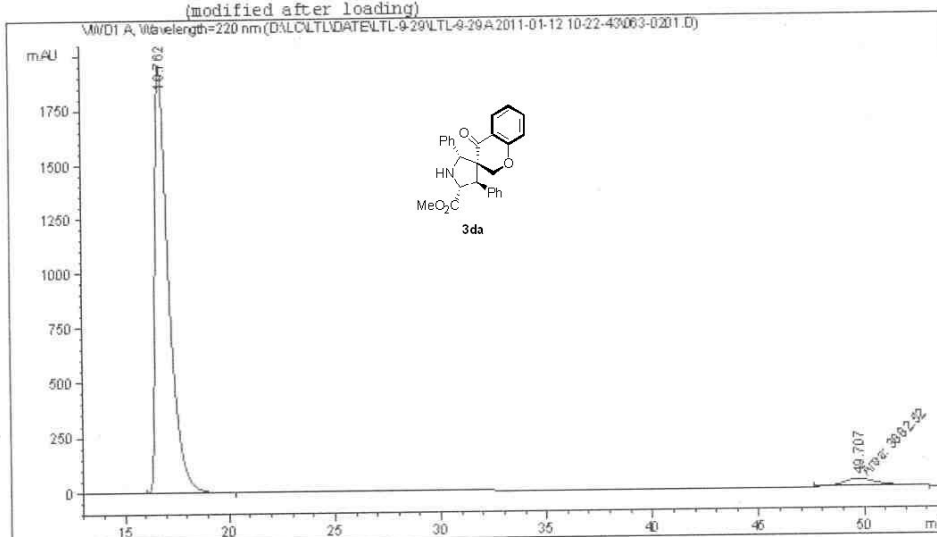

# Area Percent Report

```
Sorted By      :      Signal
Multiplier     :      1.0000
Dilution       :      1.0000
Use Multiplier & Dilution Factor with ISTDs
```

Signal 1: VWD1 A, Wavelength=220 nm

| Peak # | RetTime [min] | Type | Width [min] | Area mAU *s | Height [mAU] | Area %  |
|--------|---------------|------|-------------|-------------|--------------|---------|
| 1      | 16.762        | BB   | 0.6723      | 8.82917e4   | 1955.83447   | 95.7878 |
| 2      | 49.707        | MM   | 1.9543      | 3882.52197  | 33.11037     | 4.2122  |

Totals : 9.21742e4 1988.94485

Instrument 1 1/24/2011 4:53:21 PM LTL

Page 1 of 1



Data File D:\LC\RTL\DATE\RTL-8-54-56\RTL-8-54-56A 2010-12-07 15-08-23\056-0201.D  
Sample Name: RTL-8-54A

=====

|                 |                        |            |           |
|-----------------|------------------------|------------|-----------|
| Acq. Operator   | : THL                  | Seq. Line  | : 2       |
| Acq. Instrument | : Instrument 1         | Location   | : Vial 56 |
| Injection Date  | : 12/7/2010 3:21:00 PM | Inj        | : 1       |
|                 |                        | Inj Volume | : 5 µl    |

Acq. Method : D:\LC\RTL\DATE\RTL-8-54-56\RTL-8-54-56A 2010-12-07 15-08-23\ADH-30-70-1ML-22ONM-80MIN.M

Last changed : 12/7/2010 4:19:09 PM by THL  
(modified after loading)

Analysis Method : D:\LC\RTL\DATE\RTL-8-54-56\RTL-8-54-56A 2010-12-07 15-08-23\056-0201.D\DA.M (ADH-30-70-1ML-22ONM-80MIN.M)

Last changed : 12/7/2010 7:03:27 PM by THL  
(modified after loading)

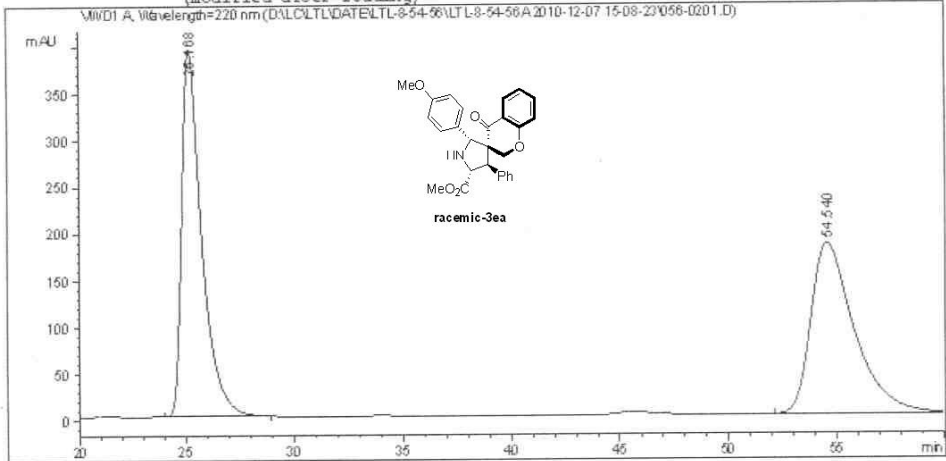

=====  
Area Percent Report  
=====

Sorted By : Signal  
Multiplier : 1.0000  
Dilution : 1.0000  
Use Multiplier & Dilution Factor with ISTDs

Signal 1: VMD1 A, Wavelength=220 nm

| Peak # | RetTime [min] | Type | Width [min] | Area mAU *s | Height [mAU] | Area %  |
|--------|---------------|------|-------------|-------------|--------------|---------|
| 1      | 25.168        | EB   | 0.9595      | 2.53876e4   | 392.71057    | 49.9668 |
| 2      | 54.540        | EB   | 2.0516      | 2.54214e4   | 182.84471    | 50.0332 |

Totals : 5.08090e4 575.55528

=====  
\*\*\* End of Report \*\*\*

Data File D:\LC\LTL\DATE\LTL-9-29\LTL-9-29B 2011-01-12 15-46-16\064-0101.D  
Sample Name: LTL-9-29B

=====

|                 |                        |            |           |
|-----------------|------------------------|------------|-----------|
| Acq. Operator   | : DXQ                  | Seq. Line  | : 1       |
| Acq. Instrument | : Instrument 1         | Location   | : Vial 64 |
| Injection Date  | : 1/12/2011 3:47:39 PM | Inj        | : 1       |
|                 |                        | Inj Volume | : 5 µl    |

Acq. Method : D:\LC\LTL\DATE\LTL-9-29\LTL-9-29B 2011-01-12 15-46-16\ADH-30-70-1ML-220NM-60MIN.M

Last changed : 1/12/2011 4:27:17 PM by DXQ  
(modified after loading)

Analysis Method : D:\LC\LTL\DATE\LTL-9-29\LTL-9-29B 2011-01-12 15-46-16\064-0101.D\DA.M (ADH-30-70-1ML-220NM-60MIN.M)

Last changed : 1/24/2011 5:23:26 PM by LTL  
(modified after loading)

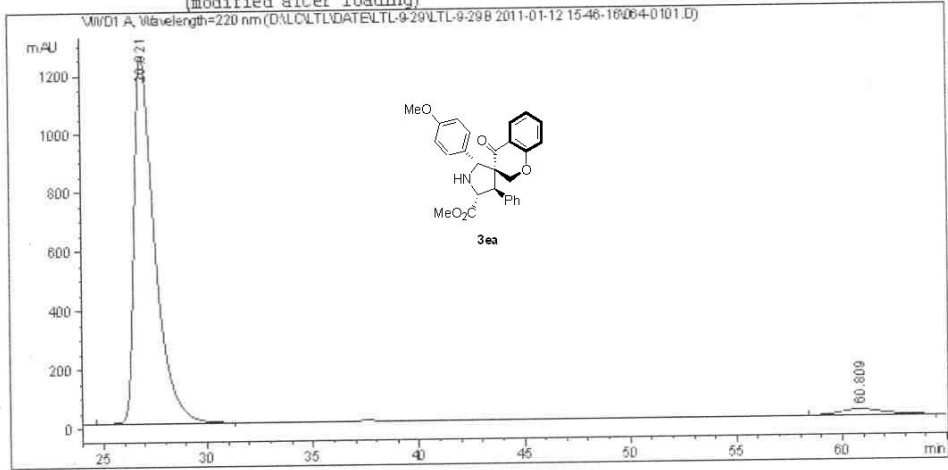

=====  
Area Percent Report  
=====

Sorted By : Signal  
Multiplier : 1.0000  
Dilution : 1.0000  
Use Multiplier & Dilution Factor with ISTDs

Signal 1: VMD1 A, Wavelength=220 nm

| Peak # | RetTime [min] | Type | Width [min] | Area mAU *s | Height [mAU] | Area %  |
|--------|---------------|------|-------------|-------------|--------------|---------|
| 1      | 26.921        | BB   | 1.0181      | 8.55990e4   | 1251.12134   | 96.9249 |
| 2      | 60.809        | BB   | 1.8770      | 2715.79858  | 19.20364     | 3.0751  |

Totals: 8.83148e4 1270.32498

=====  
\*\*\* End of Report \*\*\*

Instrument 1 1/24/2011 5:23:30 PM LTL

Page 1 of 1

Data File D:\LC\LTL\DATE\LTL-9-30\LTL-9-30A 2011-01-17 19-16-11\005-0201.D  
Sample Name: LTL-9-30A

=====

|                 |                        |            |          |
|-----------------|------------------------|------------|----------|
| Acq. Operator   | : LYY                  | Seq. Line  | : 2      |
| Acq. Instrument | : Instrument 1         | Location   | : Vial 5 |
| Injection Date  | : 1/17/2011 7:28:35 PM | Inj        | : 1      |
|                 |                        | Inj Volume | : 5 µl   |

Acq. Method : D:\LC\LTL\DATE\LTL-9-30\LTL-9-30A 2011-01-17 19-16-11\ADH-30-70-1ML-220NM-80MIN.M

Last changed : 1/17/2011 8:15:20 PM by LYY  
(modified after loading)

Analysis Method : D:\LC\LTL\DATE\LTL-9-30\LTL-9-30A 2011-01-17 19-16-11\005-0201.D\DA.M (ADH-30-70-1ML-220NM-80MIN.M)

Last changed : 1/24/2011 5:06:58 PM by LTL  
(modified after loading)

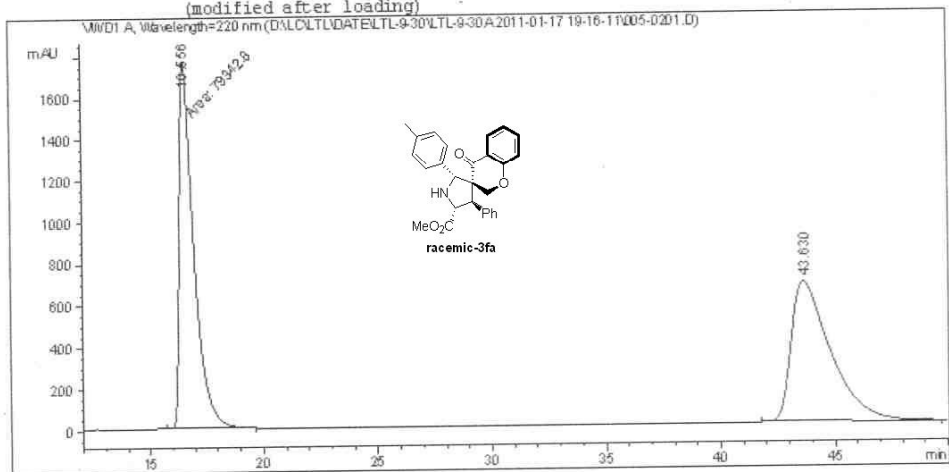

=====  
Area Percent Report  
=====

Sorted By : Signal  
Multiplier : 1.0000  
Dilution : 1.0000  
Use Multiplier & Dilution Factor with ISTDs

Signal 1: VWD1 A, Wavelength=220 nm

| Peak # | RetTime [min] | Type | Width [min] | Area mAU  | Height [mAU] | Area %  |
|--------|---------------|------|-------------|-----------|--------------|---------|
| 1      | 16.556        | NM   | 0.7480      | 7.93428e4 | 1767.99084   | 49.4192 |
| 2      | 43.630        | EB   | 1.7742      | 8.12076e4 | 676.02759    | 50.5808 |

Totals : 1.60550e5 2444.01843

=====  
\*\*\* End of Report \*\*\*

Instrument 1 1/24/2011 5:07:02 PM LTL

Page 1 of 1

Data File D:\LC\LTL\DATE\LTL-9-30\LTL-9-30B 2011-01-22 09-47-32\069-0201.D  
Sample Name: LTL-9-30B

=====

|                 |                         |            |           |
|-----------------|-------------------------|------------|-----------|
| Acq. Operator   | : THL-7-95-97           | Seq. Line  | : 2       |
| Acq. Instrument | : Instrument 1          | Location   | : Vial 69 |
| Injection Date  | : 1/22/2011 10:05:00 AM | Inj        | : 1       |
|                 |                         | Inj Volume | : 5 µl    |

Acq. Method : D:\LC\LTL\DATE\LTL-9-30\LTL-9-30B 2011-01-22 09-47-32\ADH-30-70-1ML-220NM-60MIN.M

Last changed : 1/22/2011 10:53:50 AM by THL-7-95-97  
(modified after loading)

Analysis Method : D:\LC\LTL\DATE\LTL-9-30\LTL-9-30B 2011-01-22 09-47-32\069-0201.D\DA.M (ADH-30-70-1ML-220NM-60MIN.M)

Last changed : 1/24/2011 5:08:31 PM by LTL  
(modified after loading)

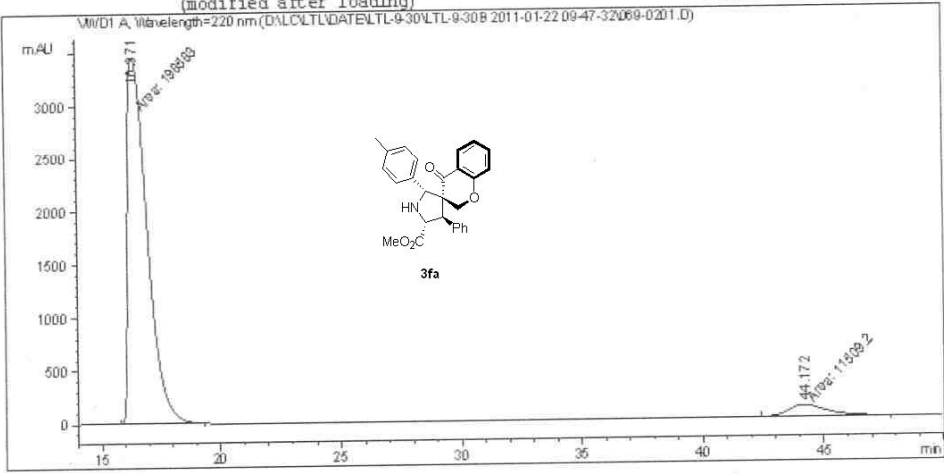

=====  
Area Percent Report  
=====

Sorted By : Signal  
Multiplier : 1.0000  
Dilution : 1.0000  
Use Multiplier & Dilution Factor with ISTDs

Signal 1: WVD1 A, Wavelength=220 nm

| Peak # | RetTime [min] | Type | Width [min] | Area mAU *s | Height [mAU] | Area %  |
|--------|---------------|------|-------------|-------------|--------------|---------|
| 1      | 16.371        | MM   | 0.9566      | 1.98583e5   | 3459.97070   | 94.5218 |
| 2      | 44.172        | MM   | 1.8286      | 1.15092e4   | 104.90173    | 5.4782  |

Totals: 2.10092e5 3564.87243

=====  
\*\*\* End of Report \*\*\*

Instrument 1 1/24/2011 5:08:35 PM LTL

Page 1 of 1

Data File D:\LC\LTL\DATE\LTL-11-13\LTL-11-13A 2011-06-01 08-29-22\034-0201.D  
Sample Name: LTL-11-13A

```
=====
Acq. Operator   : LTL                               Seq. Line :    2
Acq. Instrument : Instrument 1                     Location  : Vial 34
Injection Date  : 6/1/2011 8:41:57 AM              Inj       :    1
                                                    Inj Volume: 5 µl
Acq. Method     : D:\LC\LTL\DATE\LTL-11-13\LTL-11-13A 2011-06-01 08-29-22\ADH-30-70-1ML-
                  220NM-80MIN.M
Last changed    : 11/27/2010 11:06:07 AM by LTL
Analysis Method : D:\LC\LTL\DATE\LTL-11-13\LTL-11-13A 2011-06-01 08-29-22\034-0201.D\DA.M (
                  ADH-30-70-1ML-220NM-80MIN.M)
Last changed    : 6/1/2011 3:20:14 PM by LTL
                  (modified after loading)
=====
```

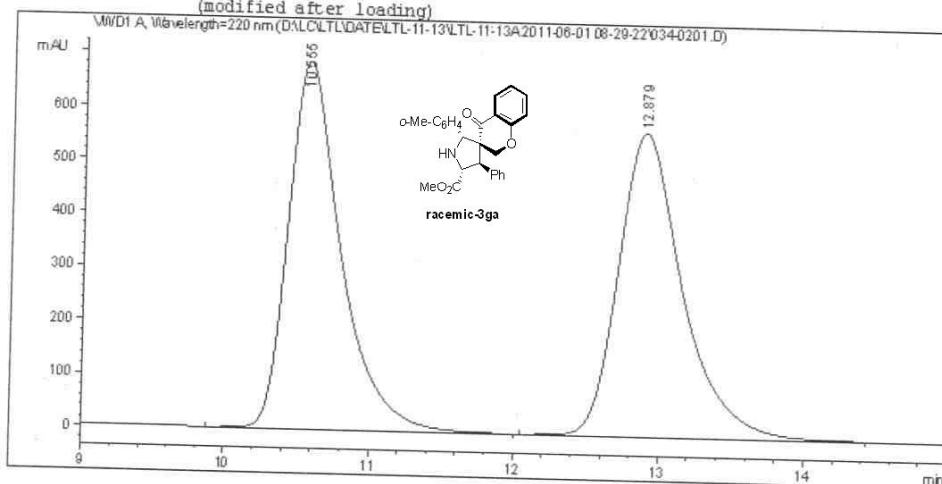

# Area Percent Report

```
=====
Sorted By      :      Signal
Multiplier     :      1.0000
Dilution       :      1.0000
Use Multiplier & Dilution Factor with ISTDs
=====
```

Signal 1: WVD1 A, Wavelength=220 nm

| Peak # | RetTime [min] | Type | Width [min] | Area mAU  | Height [mAU] | Area %  |
|--------|---------------|------|-------------|-----------|--------------|---------|
| 1      | 10.555        | VB   | 0.3760      | 1.73337e4 | 686.65393    | 50.0591 |
| 2      | 12.879        | EB   | 0.4580      | 1.72928e4 | 566.58771    | 49.9409 |

```
Totals :                      3.46265e4  1253.24164
=====
```

\*\*\* End of Report \*\*\*

Instrument 1 6/1/2011 3:20:18 PM LTL

Page 1 of 1

Data File D:\LC\RTL\DATE\RTL-11-13\RTL-11-13B 2011-06-01 15-01-45\035-0101.D  
Sample Name: RTL-11-13B

```
=====
Acq. Operator   : LTL                               Seq. Line :    1
Acq. Instrument : Instrument 1                       Location  : Vial 35
Injection Date  : 6/1/2011 3:03:17 PM                Inj       :    1
                                                    Inj Volume: 5 µl
Acq. Method     : D:\LC\RTL\DATE\RTL-11-13\RTL-11-13B 2011-06-01 15-01-45\ADH-30-70-1ML-
                  220NM-25MIN.M
Last changed    : 6/1/2011 3:16:55 PM by LTL
                  (modified after loading)
Analysis Method : D:\LC\RTL\DATE\RTL-11-13\RTL-11-13B 2011-06-01 15-01-45\035-0101.D\DA.M (
                  ADH-30-70-1ML-220NM-25MIN.M)
Last changed    : 6/1/2011 3:19:45 PM by LTL
                  (modified after loading)
=====
```

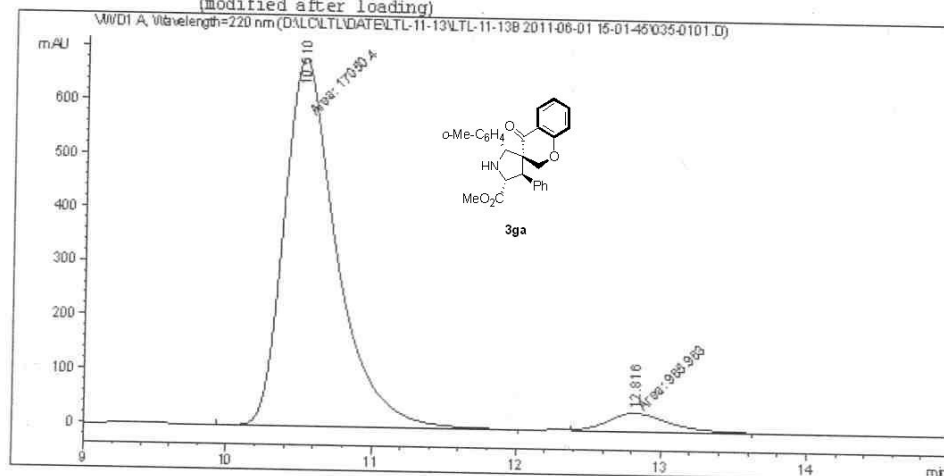

# Area Percent Report

```
Sorted By      : Signal
Multiplier     : 1.0000
Dilution       : 1.0000
Use Multiplier & Dilution Factor with ISTDs
```

Signal 1: VWD1 A, Wavelength=220 nm

| Peak # | RetTime [min] | Type | Width [min] | Area mAU  | Height [mAU] | Area %  |
|--------|---------------|------|-------------|-----------|--------------|---------|
| 1      | 10.510        | NM   | 0.4163      | 1.70504e4 | 682.63660    | 94.6384 |
| 2      | 12.816        | NM   | 0.4792      | 965.96259 | 33.59390     | 5.3616  |

Totals : 1.80164e4 716.23050

\*\*\* End of Report \*\*\*

Instrument 1 6/1/2011 3:19:50 PM LTL

Page 1 of 1

Data File D:\LC\LTL\DATE\LTL-11-28\LTL-11-28 2011-06-09 12-10-08\063-0401.D  
Sample Name: LTL-11-14A

=====

|                 |                       |            |           |
|-----------------|-----------------------|------------|-----------|
| Acq. Operator   | : LTL                 | Seq. Line  | : 4       |
| Acq. Instrument | : Instrument 1        | Location   | : Vial 63 |
| Injection Date  | : 6/9/2011 2:06:07 PM | Inj        | : 1       |
|                 |                       | Inj Volume | : 5 µl    |

Acq. Method : D:\LC\LTL\DATE\LTL-11-28\LTL-11-28 2011-06-09 12-10-08\ADH-30-70-1ML-220NM-40MIN-NOT.M

Last changed : 6/9/2011 2:30:27 PM by LTL  
(modified after loading)

Analysis Method : D:\LC\LTL\DATE\LTL-11-28\LTL-11-28 2011-06-09 12-10-08\063-0401.D\DA.M (ADH-30-70-1ML-220NM-40MIN-NOT.M)

Last changed : 6/13/2011 9:52:05 PM by LTL  
(modified after loading)

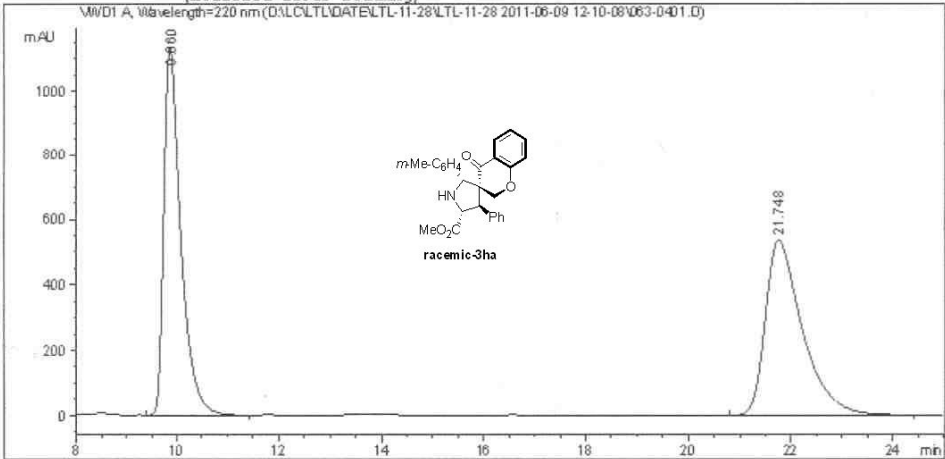

=====  
Area Percent Report  
=====

Sorted By : Signal  
Multiplier : 1.0000  
Dilution : 1.0000  
Use Multiplier & Dilution Factor with ISTDs

Signal 1: WVD1 A, Wavelength=220 nm

| Peak # | RetTime [min] | Type | Width [min] | Area mAU  | Height [mAU] | Area %  |
|--------|---------------|------|-------------|-----------|--------------|---------|
| 1      | 9.860         | VB   | 0.3486      | 2.67065e4 | 1135.79907   | 49.7768 |
| 2      | 21.748        | BB   | 0.7475      | 2.69460e4 | 536.53448    | 50.2232 |

Totals : 5.36525e4 1672.33356

=====  
\*\*\* End of Report \*\*\*



Data File D:\LC\RTL\DATE\RTL-11-28\RTL-11-28 2011-06-09 12-10-08\064-0501.D  
Sample Name: RTL-11-28B

=====

|                 |                                                                                                            |            |           |
|-----------------|------------------------------------------------------------------------------------------------------------|------------|-----------|
| Acq. Operator   | : LTL                                                                                                      | Seq. Line  | : 5       |
| Acq. Instrument | : Instrument 1                                                                                             | Location   | : Vial 64 |
| Injection Date  | : 6/9/2011 2:34:41 PM                                                                                      | Inj        | : 1       |
|                 |                                                                                                            | Inj Volume | : 5 µl    |
| Acq. Method     | : D:\LC\RTL\DATE\RTL-11-28\RTL-11-28 2011-06-09 12-10-08\ADH-30-70-1ML-220NM-40MIN-NOT.M                   |            |           |
| Last changed    | : 6/9/2011 2:33:21 PM by LTL<br>(modified after loading)                                                   |            |           |
| Analysis Method | : D:\LC\RTL\DATE\RTL-11-28\RTL-11-28 2011-06-09 12-10-08\064-0501.D\DA.M (ADH-30-70-1ML-220NM-40MIN-NOT.M) |            |           |
| Last changed    | : 6/13/2011 9:52:36 PM by LTL<br>(modified after loading)                                                  |            |           |

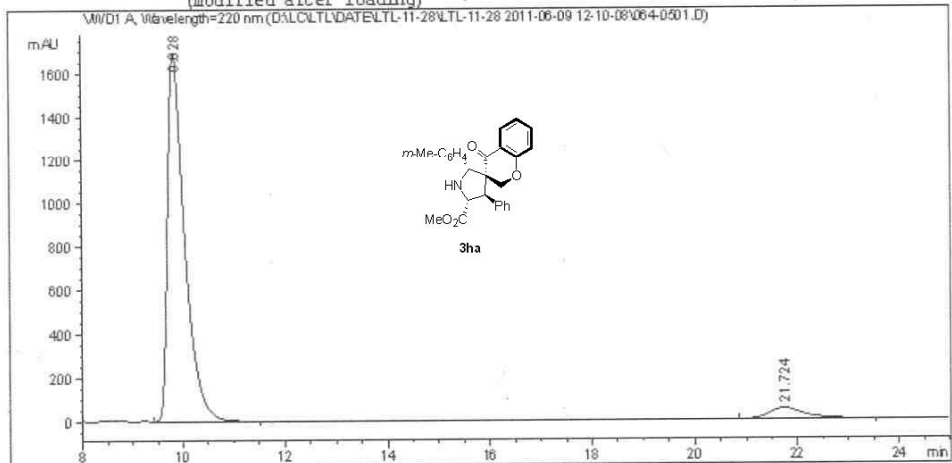

Area Percent Report

Sorted By : Signal  
Multiplier : 1.0000  
Dilution : 1.0000  
Use Multiplier & Dilution Factor with ISTDs

Signal 1: WVD1 A, Wavelength=220 nm

| Peak # | RetTime [min] | Type | Width [min] | Area mAU   | Height [mAU] | Area %  |
|--------|---------------|------|-------------|------------|--------------|---------|
| 1      | 9.828         | VB   | 0.3489      | 3.99175e4  | 1695.51526   | 94.4627 |
| 2      | 21.724        | EB   | 0.7175      | 2339.90234 | 48.84929     | 5.5373  |

Totals : 4.22574e4 1744.36454

\*\*\* End of Report \*\*\*







Data File D:\LC\LTLD\DATE\LTLD-8-54-56\LTLD-8-54-56A 2010-12-07 15-08-23\057-0301.D  
Sample Name: LTLD-8-56A

=====

|                 |                                                                                                                |            |           |
|-----------------|----------------------------------------------------------------------------------------------------------------|------------|-----------|
| Acq. Operator   | : THL                                                                                                          | Seq. Line  | : 3       |
| Acq. Instrument | : Instrument 1                                                                                                 | Location   | : Vial 57 |
| Injection Date  | : 12/7/2010 4:22:53 PM                                                                                         | Inj        | : 1       |
|                 |                                                                                                                | Inj Volume | : 5 µl    |
| Acq. Method     | : D:\LC\LTLD\DATE\LTLD-8-54-56\LTLD-8-54-56A 2010-12-07 15-08-23\ADH-30-70-1ML-220NM-60MIN.M                   |            |           |
| Last changed    | : 12/7/2010 3:06:41 PM by THL                                                                                  |            |           |
| Analysis Method | : D:\LC\LTLD\DATE\LTLD-8-54-56\LTLD-8-54-56A 2010-12-07 15-08-23\057-0301.D\DA.M (ADH-30-70-1ML-220NM-60MIN.M) |            |           |
| Last changed    | : 12/7/2010 7:02:41 PM by THL                                                                                  |            |           |

(modified after loading)

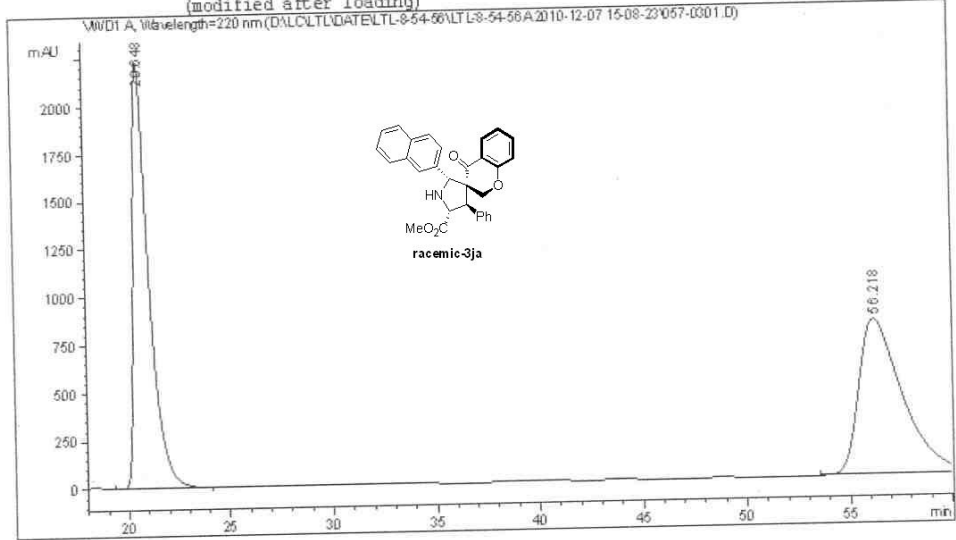

=====  
Area Percent Report  
=====

Sorted By : Signal  
Multiplier : 1.0000  
Dilution : 1.0000  
Use Multiplier & Dilution Factor with ISTDs

Signal 1: WVD1 A, Wavelength=220 nm

| Peak #   | RetTime [min] | Type | Width [min] | Area mAU  | Height [mAU] | Area %  |
|----------|---------------|------|-------------|-----------|--------------|---------|
| 1        | 20.648        | VB   | 0.8054      | 1.20859e5 | 2230.42065   | 50.2322 |
| 2        | 56.218        | EBA  | 2.1804      | 1.19742e5 | 814.13837    | 49.7678 |
| Totals : |               |      |             | 2.40601e5 | 3044.55902   |         |

Data File D:\LC\LTL\DATE\LTL-9-29\LTL-9-29D 2011-01-12 18-44-26\066-0101.D  
Sample Name: LTL-9-29D

```
=====
Acq. Operator   : DXQ                      Seq. Line :    1
Acq. Instrument : Instrument 1              Location  : Vial 66
Injection Date  : 1/12/2011 6:46:04 PM     Inj       :    1
                                           Inj Volume: 5 µl

Acq. Method     : D:\LC\LTL\DATE\LTL-9-29\LTL-9-29D 2011-01-12 18-44-26\ADH-30-70-1ML-220NM-
                                           80MIN.M
Last changed    : 11/27/2010 11:06:07 AM by LTL
Analysis Method : D:\LC\LTL\DATE\LTL-9-29\LTL-9-29D 2011-01-12 18-44-26\066-0101.D\DA.M (
ADH-30-70-1ML-220NM-80MIN.M)
Last changed    : 1/24/2011 4:55:59 PM by LTL
                  (modified after loading)
=====
```

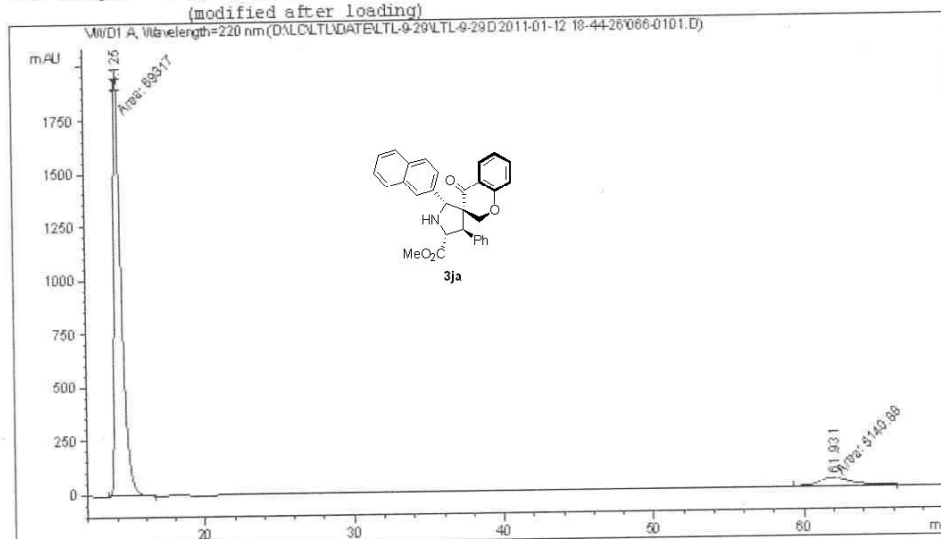

# Area Percent Report

```
Sorted By      :      Signal
Multiplier     :      1.0000
Dilution       :      1.0000
Use Multiplier & Dilution Factor with ISTDs
```

Signal 1: VMD1 A, Wavelength=220 nm

| Peak # | RetTime [min] | Type | Width [min] | Area mAU   | Height [mAU] | Area %  |
|--------|---------------|------|-------------|------------|--------------|---------|
| 1      | 14.125        | MM   | 0.5796      | 6.93170e4  | 1993.36377   | 93.0956 |
| 2      | 61.931        | MM   | 2.4289      | 5140.88037 | 35.27583     | 6.9044  |

Totals : 7.44578e4 2028.63960

Instrument 1 1/24/2011 4:56:03 PM LTL

Page 1 of 1

Data File D:\LC\LTL\DATE\LTL-8-54-56\LTL-8-54-56A 2010-12-07 15-08-23\058-0401.D  
Sample Name: LTL-8-55A

=====

|                 |                        |            |           |
|-----------------|------------------------|------------|-----------|
| Acq. Operator   | : THL                  | Seq. Line  | : 4       |
| Acq. Instrument | : Instrument 1         | Location   | : Vial 58 |
| Injection Date  | : 12/7/2010 5:24:08 PM | Inj        | : 1       |
|                 |                        | Inj Volume | : 5 µl    |

Acq. Method : D:\LC\LTL\DATE\LTL-8-54-56\LTL-8-54-56A 2010-12-07 15-08-23\ADH-30-70-1ML-220NM-60MIN.M

Last changed : 12/7/2010 5:29:53 PM by THL  
(modified after loading)

Analysis Method : D:\LC\LTL\DATE\LTL-8-54-56\LTL-8-54-56A 2010-12-07 15-08-23\058-0401.D\DA.M (ADH-30-70-1ML-220NM-60MIN.M)

Last changed : 12/7/2010 7:04:36 PM by THL  
(modified after loading)

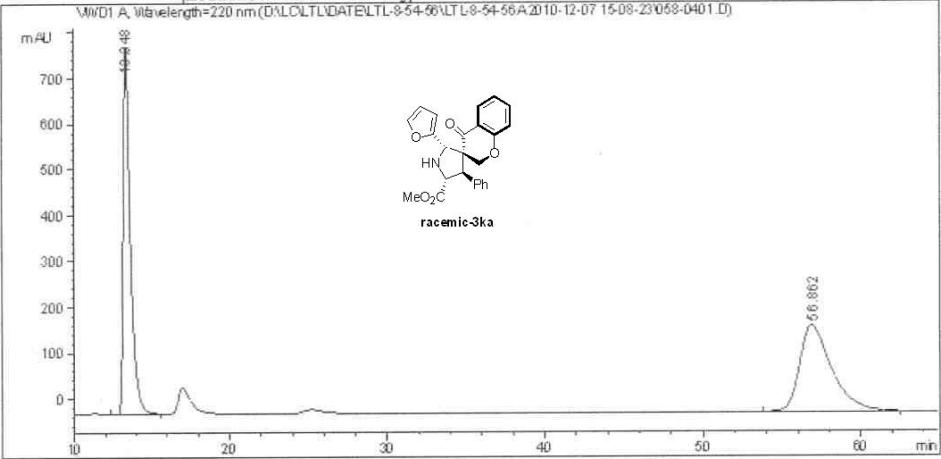

=====  
Area Percent Report  
=====

Sorted By : Signal  
Multiplier : 1.0000  
Dilution : 1.0000  
Use Multiplier & Dilution Factor with ISTDs

Signal 1: WVD1 A, Wavelength=220 nm

| Peak # | RetTime [min] | Type | Width [min] | Area mAU *s | Height [mAU] | Area %  |
|--------|---------------|------|-------------|-------------|--------------|---------|
| 1      | 13.348        | BB   | 0.4798      | 2.60438e4   | 801.07672    | 49.6298 |
| 2      | 56.862        | BB   | 2.0802      | 2.64323e4   | 187.64384    | 50.3702 |

Totals : 5.24761e4 988.72057

=====  
\*\*\* End of Report \*\*\*

Data File D:\LC\LTL\DATE\LTL-9-29\LTL-9-29C 2011-01-12 16-54-15\065-0101.D  
Sample Name: LTL-9-29C

```
=====
Acq. Operator   : DXQ                               Seq. Line :    1
Acq. Instrument : Instrument 1                       Location  : Vial 65
Injection Date  : 1/12/2011 4:55:36 PM              Inj       :    1
                                                    Inj Volume: 5 µl
Acq. Method     : D:\LC\LTL\DATE\LTL-9-29\LTL-9-29C 2011-01-12 16-54-15\ADH-30-70-1ML-220NM-
60MIN.M
Last changed    : 1/12/2011 5:28:48 PM by DXQ
                  (modified after loading)
Analysis Method : D:\LC\LTL\DATE\LTL-9-29\LTL-9-29C 2011-01-12 16-54-15\065-0101.D\DA.M (
ADH-30-70-1ML-220NM-60MIN.M)
Last changed    : 1/24/2011 5:24:14 PM by LTL
                  (modified after loading)
=====
```

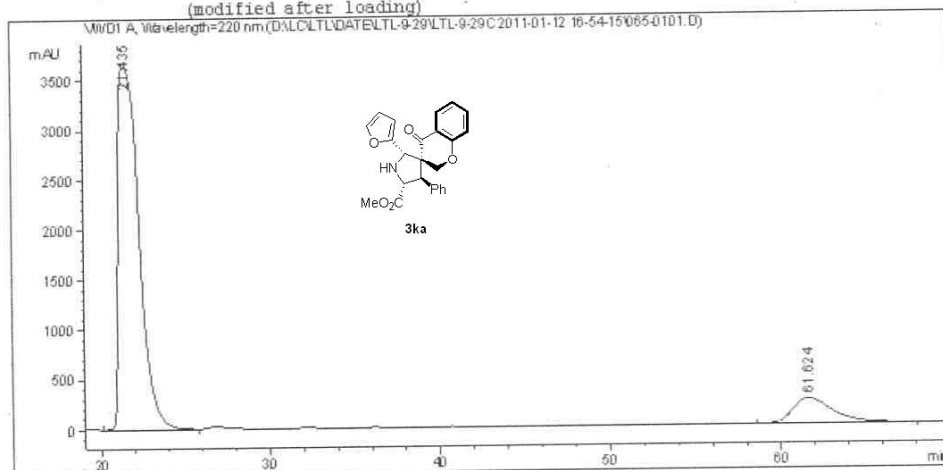

Area Percent Report

```
Sorted By      : Signal
Multiplier     : 1.0000
Dilution       : 1.0000
Use Multiplier & Dilution Factor with ISTDs
```

Signal 1: VM01 A, Wavelength=220 nm

| Peak # | RetTime [min] | Type | Width [min] | Area mAU  | Height [mAU] | Area %  |
|--------|---------------|------|-------------|-----------|--------------|---------|
| 1      | 21.435        | VB   | 1.0236      | 3.18022e5 | 3682.40796   | 88.8348 |
| 2      | 61.624        | EB   | 2.3637      | 3.99707e4 | 250.91745    | 11.1652 |

Totals : 3.57993e5 3933.32541

\*\*\* End of Report \*\*\*

Instrument 1 1/24/2011 5:24:17 PM LTL

Page 1 of 1

Data File D:\LC\LTL\DATE\LTL-8-64-67\LTL-8-64-67A-1 2010-11-27 11-08-15\050-0201.D  
Sample Name: LTL-8-64A

=====

|                 |                          |            |           |
|-----------------|--------------------------|------------|-----------|
| Acq. Operator   | : LTL                    | Seq. Line  | : 2       |
| Acq. Instrument | : Instrument 1           | Location   | : Vial 50 |
| Injection Date  | : 11/27/2010 11:20:46 AM | Inj        | : 1       |
|                 |                          | Inj Volume | : 5 µl    |

Acq. Method : D:\LC\LTL\DATE\LTL-8-64-67\LTL-8-64-67A-1 2010-11-27 11-08-15\ADH-30-70-  
IML-22ONM-80MIN.M

Last changed : 11/27/2010 11:06:07 AM by LTL

Analysis Method : D:\LC\LTL\DATE\LTL-8-64-67\LTL-8-64-67A-1 2010-11-27 11-08-15\050-0201.D\  
DA.M (ADH-30-70-IML-22ONM-80MIN.M)

Last changed : 11/27/2010 2:34:39 PM by LTL  
(modified after loading)

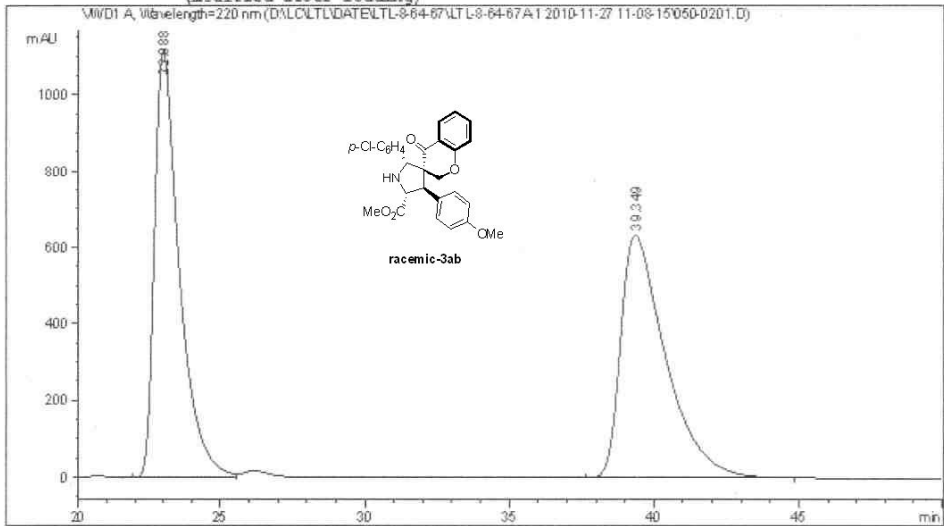

=====  
Area Percent Report  
=====

Sorted By : Signal  
Multiplier : 1.0000  
Dilution : 1.0000  
Use Multiplier & Dilution Factor with ISTDs

Signal 1: WVD1 A, Wavelength=220 nm

| Peak # | RetTime [min] | Type | Width [min] | Area mAU  | Height [mAU] | Area %  |
|--------|---------------|------|-------------|-----------|--------------|---------|
| 1      | 22.988        | EV   | 0.8982      | 6.75650e4 | 1114.21472   | 49.8881 |
| 2      | 39.349        | EE   | 1.5892      | 6.78681e4 | 633.45526    | 50.1119 |

Totals : 1.35433e5 1747.66998

Instrument 1 11/27/2010 2:34:43 PM LTL

Page 1 of 1



Data File D:\LC\LQH\DATE\LQH-3-85-86\LQH-3-85-LTL-7-9 2011-01-24 11-31-41\100-0701.D  
Sample Name: LTL-8-64B

=====

|                 |                        |            |            |
|-----------------|------------------------|------------|------------|
| Acq. Operator   | : LTL                  | Seq. Line  | : 7        |
| Acq. Instrument | : Instrument 1         | Location   | : Vial 100 |
| Injection Date  | : 1/24/2011 2:21:31 PM | Inj        | : 1        |
|                 |                        | Inj Volume | : 5 µl     |

Acq. Method : D:\LC\LQH\DATE\LQH-3-85-86\LQH-3-85-LTL-7-9 2011-01-24 11-31-41\ADH-30-70-  
IML-22ONM-50MIN.M

Last changed : 11/29/2010 10:38:15 AM by THL

Analysis Method : D:\LC\LQH\DATE\LQH-3-85-86\LQH-3-85-LTL-7-9 2011-01-24 11-31-41\100-0701.  
D\DA.M (ADH-30-70-IML-22ONM-50MIN.M)

Last changed : 1/24/2011 3:12:49 PM by LTL  
(modified after loading)

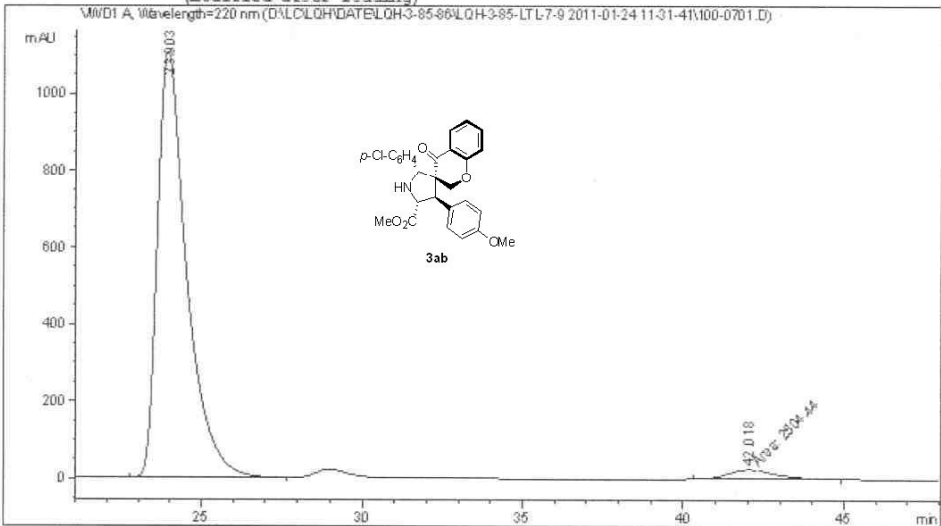

=====  
Area Percent Report  
=====

Sorted By : Signal  
Multiplier : 1.0000  
Dilution : 1.0000  
Use Multiplier & Dilution Factor with ISTDs

Signal 1: WVD1 A, Wavelength=220 nm

| Peak # | RetTime [min] | Type | Width [min] | Area mAU   | Height [mAU] | Area %  |
|--------|---------------|------|-------------|------------|--------------|---------|
| 1      | 23.903        | EB   | 0.9536      | 7.14252e4  | 1109.23816   | 96.6124 |
| 2      | 42.018        | MM   | 1.7217      | 2504.43726 | 24.24403     | 3.3876  |

Totals : 7.39296e4 1133.48219



Data File D:\LC\RTL\DATE\RTL-8-64-67\RTL-8-64-67A-1 2010-11-27 11-08-15\060-0401.D  
Sample Name: RTL-8-67A

=====

|                 |                          |            |           |
|-----------------|--------------------------|------------|-----------|
| Acq. Operator   | : LTL                    | Seq. Line  | : 4       |
| Acq. Instrument | : Instrument 1           | Location   | : Vial 60 |
| Injection Date  | : 11/27/2010 12:53:28 PM | Inj        | : 1       |
|                 |                          | Inj Volume | : 5 µl    |

Acq. Method : D:\LC\RTL\DATE\RTL-8-64-67\RTL-8-64-67A-1 2010-11-27 11-08-15\ASH-10-90-  
IML-220NM-60MIN.M

Last changed : 8/30/2010 5:07:19 PM by LTL

Analysis Method : D:\LC\RTL\DATE\RTL-8-64-67\RTL-8-64-67A-1 2010-11-27 11-08-15\060-0401.D\  
DA.M (ASH-10-90-IML-220NM-60MIN.M)

Last changed : 11/27/2010 2:34:10 PM by LTL  
(modified after loading)

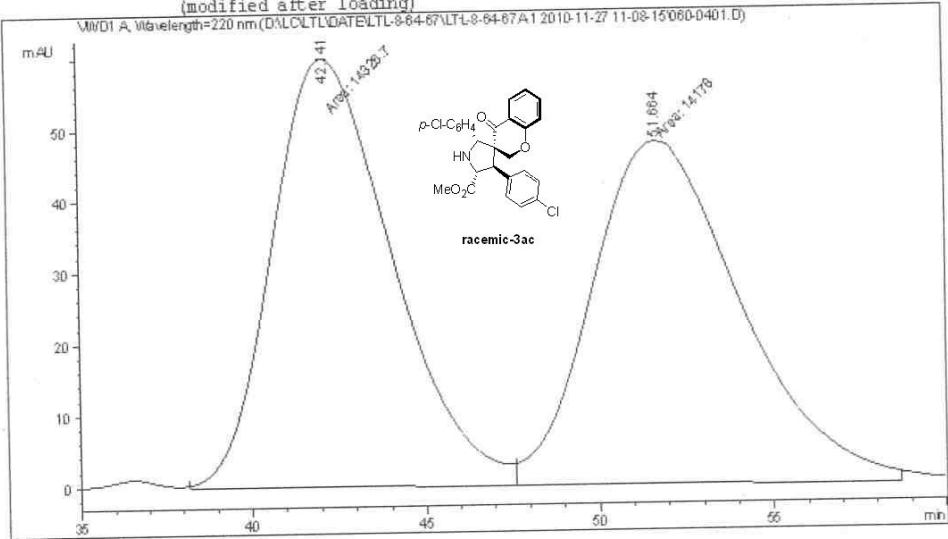

=====  
Area Percent Report  
=====

Sorted By : Signal  
Multiplier : 1.0000  
Dilution : 1.0000  
Use Multiplier & Dilution Factor with ISTDs

Signal 1: VM01 A, Wavelength=220 nm

| Peak #   | RetTime [min] | Type | Width [min] | Area mAU  | Height [mAU] | Area %  |
|----------|---------------|------|-------------|-----------|--------------|---------|
| 1        | 42.141        | MF   | 3.9815      | 1.43267e4 | 59.97124     | 50.2608 |
| 2        | 51.664        | FM   | 4.9204      | 1.41780e4 | 48.02431     | 49.7392 |
| Totals : |               |      |             | 2.85047e4 | 107.99556    |         |

Instrument 1 11/27/2010 2:34:15 PM LTL

Page 1 of 1

data File D:\LC\RTL\DATE\RTL-8-62-67B\RTL-8-62-67B 2010-11-29 10-38-40\070-0101.D  
Sample Name: RTL-8-67B

=====

|                 |                          |            |           |
|-----------------|--------------------------|------------|-----------|
| Acq. Operator   | : THL                    | Seq. Line  | : 1       |
| Acq. Instrument | : Instrument 1           | Location   | : Vial 70 |
| Injection Date  | : 11/29/2010 10:40:14 AM | Inj        | : 1       |
|                 |                          | Inj Volume | : 5 µl    |

Acq. Method : D:\LC\RTL\DATE\RTL-8-62-67B\RTL-8-62-67B 2010-11-29 10-38-40\ASH-10-90-  
IML-220NM-60MIN.M

Last changed : 8/30/2010 5:07:19 PM by LTL

Analysis Method : D:\LC\RTL\DATE\RTL-8-62-67B\RTL-8-62-67B 2010-11-29 10-38-40\070-0101.D\  
DA.M (ASH-10-90-IML-220NM-60MIN.M)

Last changed : 11/29/2010 12:15:15 PM by THL  
(modified after loading)

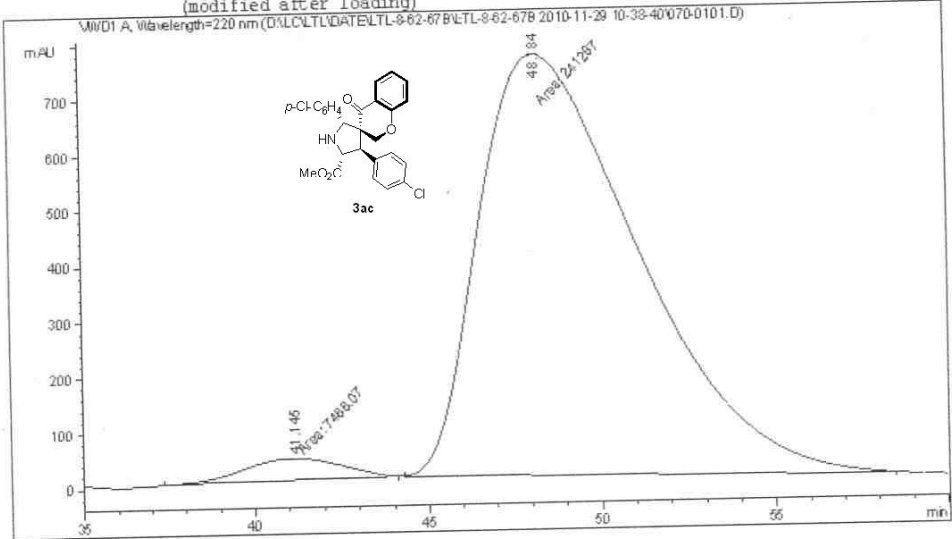

Area Percent Report

Sorted By : Signal  
Multiplier : 1.0000  
Dilution : 1.0000  
Use Multiplier & Dilution Factor with ISTDs

Signal 1: WVD1 A, Wavelength=220 nm

| Peak #   | RetTime [min] | Type | Width [min] | Area mAU   | Area %s   | Height [mAU] | Area % |
|----------|---------------|------|-------------|------------|-----------|--------------|--------|
| 1        | 41.145        | MM   | 3.1896      | 7466.06641 | 39.01257  | 3.0014       |        |
| 2        | 48.184        | MM   | 5.2990      | 2.41287e5  | 758.91125 | 96.9986      |        |
| Totals : |               |      |             | 2.48754e5  | 797.92382 |              |        |

Instrument 1 11/29/2010 12:15:19 PM THL

Page 1 of 1

Data File D:\LC\LTL\DATE\LTL-8-62\LTL-8-62A 2010-11-26 20-04-25\049-0101.D  
Sample Name: LTL-8-62A

=====

|                 |                         |            |           |
|-----------------|-------------------------|------------|-----------|
| Acq. Operator   | : LTL                   | Seq. Line  | : 1       |
| Acq. Instrument | : Instrument 1          | Location   | : Vial 49 |
| Injection Date  | : 11/26/2010 8:06:11 PM | Inj        | : 1       |
|                 |                         | Inj Volume | : 5 µl    |

Acq. Method : D:\LC\LTL\DATE\LTL-8-62\LTL-8-62A 2010-11-26 20-04-25\ASH-10-90-1ML-220NM.  
M

Last changed : 6/25/2010 8:30:46 AM by LTL

Analysis Method: D:\LC\LTL\DATE\LTL-8-62\LTL-8-62A 2010-11-26 20-04-25\049-0101.D\A.M (ASH-10-90-1ML-220NM.M)

Last changed : 11/29/2010 10:32:58 AM by THL  
(modified after loading)

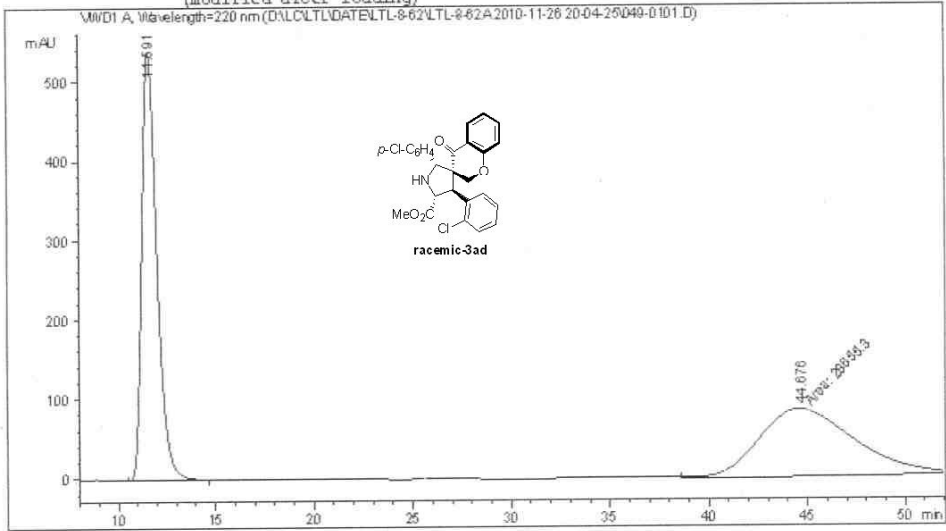

=====  
Area Percent Report  
=====

Sorted By : Signal  
Multiplier : 1.0000  
Dilution : 1.0000  
Use Multiplier & Dilution Factor with ISTDs

Signal 1: VWD1 A, Wavelength=220 nm

| Peak #   | RetTime [min] | Type | Width [min] | Area mAU  | Height [mAU] | Area %  |
|----------|---------------|------|-------------|-----------|--------------|---------|
| 1        | 11.591        | EE   | 0.8235      | 2.89142e4 | 536.81030    | 50.2248 |
| 2        | 44.676        | NM   | 5.6289      | 2.86553e4 | 84.84644     | 49.7752 |
| Totals : |               |      |             | 5.75695e4 | 621.65675    |         |

Instrument 1 11/29/2010 10:33:02 AM THL

Page 1 of 1

Data File D:\LC\LTL\DATE\LTL-8-62-67B\LTL-8-62-67B 2010-11-29 10-38-40\068-0301.D  
Sample Name: LTL-8-62B

=====

|                 |                          |            |           |
|-----------------|--------------------------|------------|-----------|
| Acq. Operator   | : THL                    | Seq. Line  | : 3       |
| Acq. Instrument | : Instrument 1           | Location   | : Vial 68 |
| Injection Date  | : 11/29/2010 12:43:17 PM | Inj        | : 1       |
|                 |                          | Inj Volume | : 5 µl    |

Acq. Method : D:\LC\LTL\DATE\LTL-8-62-67B\LTL-8-62-67B 2010-11-29 10-38-40\ASH-10-90-  
1ML-220NM-60MIN.M

Last changed : 8/30/2010 5:07:19 PM by LTL

Analysis Method : D:\LC\LTL\DATE\LTL-8-62-67B\LTL-8-62-67B 2010-11-29 10-38-40\068-0301.D\  
DA.M (ASH-10-90-1ML-220NM-60MIN.M)

Last changed : 11/29/2010 3:00:02 PM by THL  
(modified after loading)

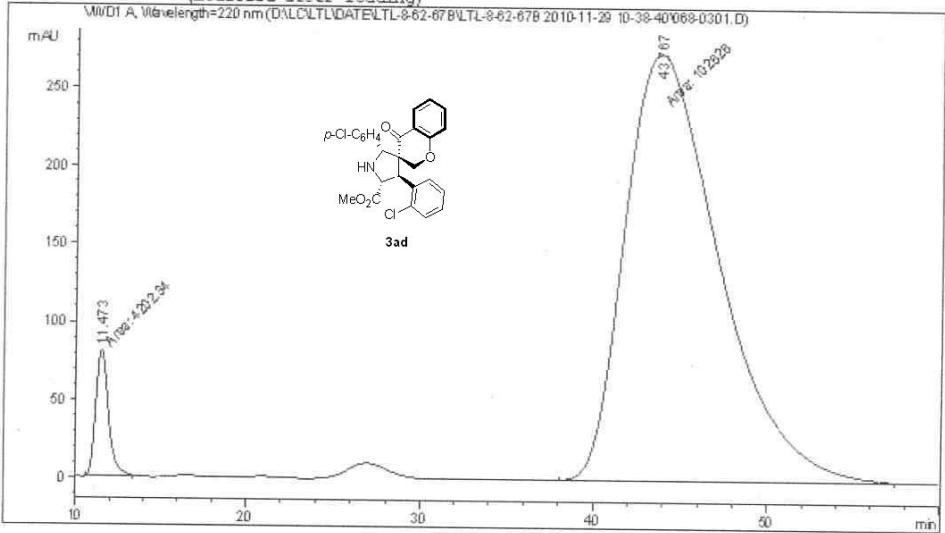

Area Percent Report

Sorted By : Signal  
Multiplier : 1.0000  
Dilution : 1.0000  
Use Multiplier & Dilution Factor with ISTDs

Signal 1: WVD1 A, Wavelength=220 nm

| Peak # | RetTime [min] | Type | Width [min] | Area mAU   | Height [mAU] | Area %  |
|--------|---------------|------|-------------|------------|--------------|---------|
| 1      | 11.473        | MM   | 0.8651      | 4202.33887 | 80.96225     | 3.9337  |
| 2      | 43.767        | MM   | 6.2674      | 1.02626e5  | 272.90829    | 96.0663 |

Totals : 1.06828e5 353.87054

Instrument 1 11/29/2010 3:00:07 PM THL

Page 1 of 1



Data File D:\LC\LTL\DATE\LTL-8-69\LTL-8-69B 2010-12-02 10-51-14\034-0201.D  
Sample Name: LTL-8-69B

=====

|                                        |                    |
|----------------------------------------|--------------------|
| Acq. Operator : dxq                    | Seq. Line : 2      |
| Acq. Instrument : Instrument 1         | Location : Vial 34 |
| Injection Date : 12/2/2010 11:03:40 AM | Inj : 1            |
|                                        | Inj Volume : 5 µl  |

Acq. Method : D:\LC\LTL\DATE\LTL-8-69\LTL-8-69B 2010-12-02 10-51-14\ASH-10-90-1ML-220NM-60MIN.M

Last changed : 8/30/2010 5:07:19 PM by LTL

Analysis Method : D:\LC\LTL\DATE\LTL-8-69\LTL-8-69B 2010-12-02 10-51-14\034-0201.D\DA.M (ASH-10-90-1ML-220NM-60MIN.M)

Last changed : 12/2/2010 2:56:25 PM by dxq  
(modified after loading)

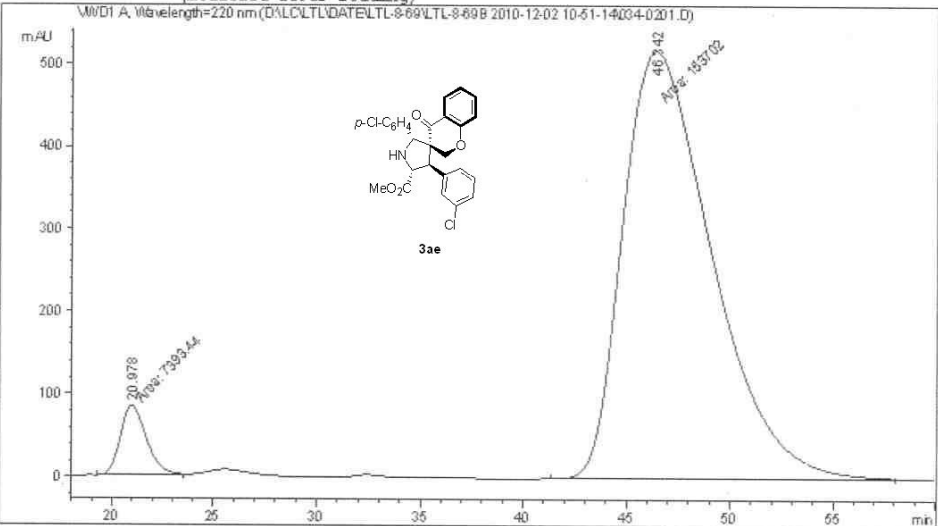

Area Percent Report

Sorted By : Signal  
Multiplier : 1.0000  
Dilution : 1.0000  
Use Multiplier & Dilution Factor with ISTDs

Signal 1: VMD1 A, Wavelength=220 nm

| Peak # | RetTime [min] | Type | Width [min] | Area mAU   | Height [mAU] | Area %  |
|--------|---------------|------|-------------|------------|--------------|---------|
| 1      | 20.978        | MM   | 1.4846      | 7393.44287 | 83.00124     | 4.5895  |
| 2      | 46.342        | MM   | 4.9574      | 1.53702e5  | 516.74640    | 95.4105 |

Totals : 1.61095e5 599.74764

Instrument 1 12/2/2010 2:56:28 PM dxq

Page 1 of 1





Data File D:\LC\LTL\DATE\LTL-8-62-67B\LTL-8-62-67B 2010-11-29 10-38-40\069-0201.D  
Sample Name: LTL-8-63B

=====

|                 |                                                                                                              |            |           |
|-----------------|--------------------------------------------------------------------------------------------------------------|------------|-----------|
| Acq. Operator   | : THL                                                                                                        | Seq. Line  | : 2       |
| Acq. Instrument | : Instrument 1                                                                                               | Location   | : Vial 69 |
| Injection Date  | : 11/29/2010 11:41:40 AM                                                                                     | Inj        | : 1       |
|                 |                                                                                                              | Inj Volume | : 5 µl    |
| Acq. Method     | : D:\LC\LTL\DATE\LTL-8-62-67B\LTL-8-62-67B 2010-11-29 10-38-40\ASH-10-90-1ML-220NM-60MIN.M                   |            |           |
| Last changed    | : 8/30/2010 5:07:19 PM by LTL                                                                                |            |           |
| Analysis Method | : D:\LC\LTL\DATE\LTL-8-62-67B\LTL-8-62-67B 2010-11-29 10-38-40\069-0201.D\DA.M (ASH-10-90-1ML-220NM-60MIN.M) |            |           |
| Last changed    | : 11/29/2010 2:56:25 PM by THL                                                                               |            |           |

(modified after loading)

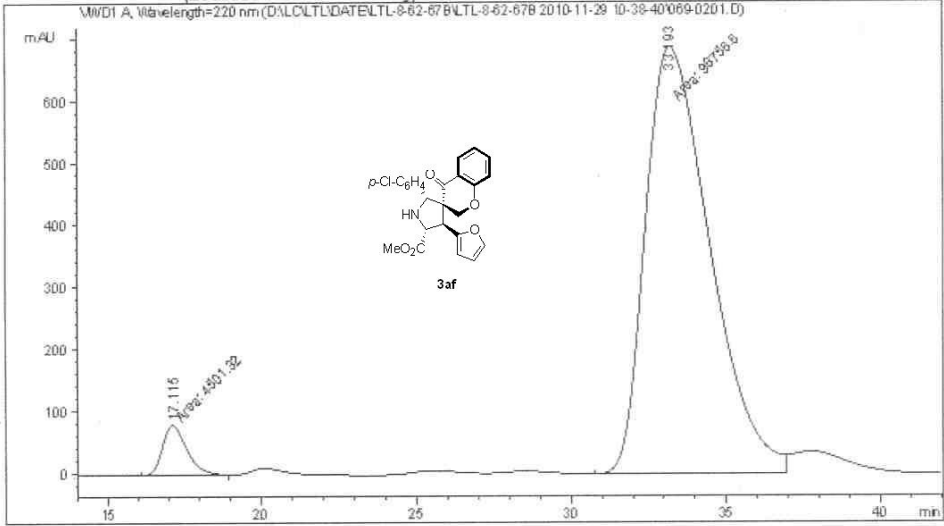

=====  
Area Percent Report  
=====

Sorted By : Signal  
Multiplier : 1.0000  
Dilution : 1.0000  
Use Multiplier & Dilution Factor with ISTDs

Signal 1: VMD1 A, Wavelength=220 nm

| Peak #   | RetTime [min] | Type | Width [min] | Area mAU *s | Height [mAU] | Area %  |
|----------|---------------|------|-------------|-------------|--------------|---------|
| 1        | 17.115        | MM   | 0.9318      | 4501.31982  | 80.51328     | 4.3593  |
| 2        | 33.193        | MF   | 2.3975      | 9.87566e4   | 686.52856    | 95.6407 |
| Totals : |               |      |             | 1.03258e5   | 767.04184    |         |

Instrument 1 11/29/2010 2:56:29 PM THL

Page 1 of 1





Data File D:\LC\LTL\DATE\LTL-11-29\LTL-11-29B 2011-06-10 21-33-54\034-0101.D  
Sample Name: LTL-11-29B

=====

|                                       |                    |
|---------------------------------------|--------------------|
| Acq. Operator : LTL                   | Seq. Line : 1      |
| Acq. Instrument : Instrument 1        | Location : Vial 34 |
| Injection Date : 6/10/2011 9:35:23 PM | Inj : 1            |
|                                       | Inj Volume : 5 µl  |

Acq. Method : D:\LC\LTL\DATE\LTL-11-29\LTL-11-29B 2011-06-10 21-33-54\ADH-30-70-1ML-220NM-40MIN-NOT.M

Last changed : 6/9/2011 12:11:50 PM by hzl

Analysis Method : D:\LC\LTL\DATE\LTL-11-29\LTL-11-29B 2011-06-10 21-33-54\034-0101.D\DA.M (ADH-30-70-1ML-220NM-40MIN-NOT.M)

Last changed : 6/10/2011 9:48:50 PM by LTL  
(modified after loading)

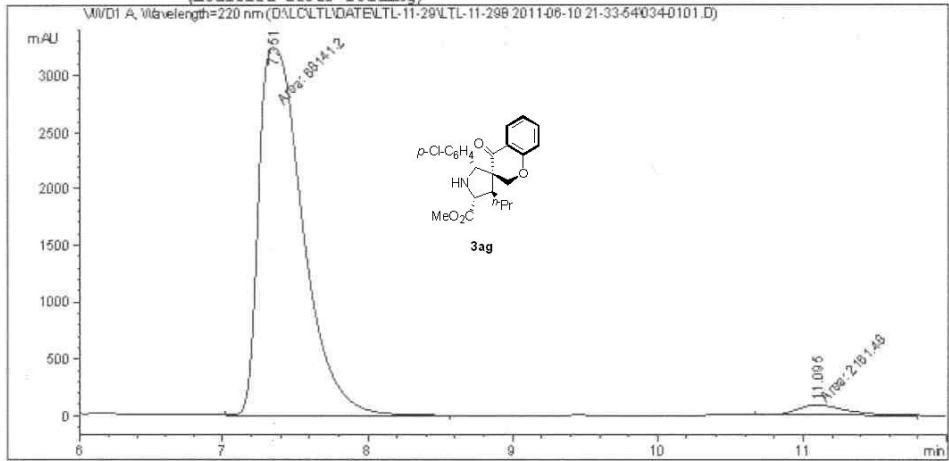

Area Percent Report

Sorted By : Signal  
Multiplier : 1.0000  
Dilution : 1.0000  
Use Multiplier & Dilution Factor with ISTDs

Signal 1: VWD1 A, Wavelength=220 nm

| Peak # | RetTime [min] | Type | Width [min] | Area mAU *s | Height [mAU] | Area %  |
|--------|---------------|------|-------------|-------------|--------------|---------|
| 1      | 7.351         | MM   | 0.3504      | 6.81412e4   | 3241.05688   | 96.9255 |
| 2      | 11.095        | MM   | 0.3925      | 2161.48486  | 91.78539     | 3.0745  |

Totals : 7.03027e4 3332.84227

\*\*\* End of Report \*\*\*

Data File D:\LC\LTL\DATE\LTL-11-19\LTL-11-19A 2011-06-02 09-41-21\022-0101.D  
Sample Name: LTL-11-19

=====

|                                      |                    |
|--------------------------------------|--------------------|
| Acq. Operator : LTL                  | Seq. Line : 1      |
| Acq. Instrument : Instrument 1       | Location : Vial 22 |
| Injection Date : 6/2/2011 9:43:03 AM | Inj : 1            |
|                                      | Inj Volume : 5 µl  |

Acq. Method : D:\LC\LTL\DATE\LTL-11-19\LTL-11-19A 2011-06-02 09-41-21\ADH-30-70-1ML-220NM-80MIN.M

Last changed : 11/27/2010 11:06:07 AM by LTL

Analysis Method : D:\LC\LTL\DATE\LTL-11-19\LTL-11-19A 2011-06-02 09-41-21\022-0101.D\DA.M (ADH-30-70-1ML-220NM-80MIN.M)

Last changed : 6/3/2011 4:31:05 PM by THL  
(modified after loading)

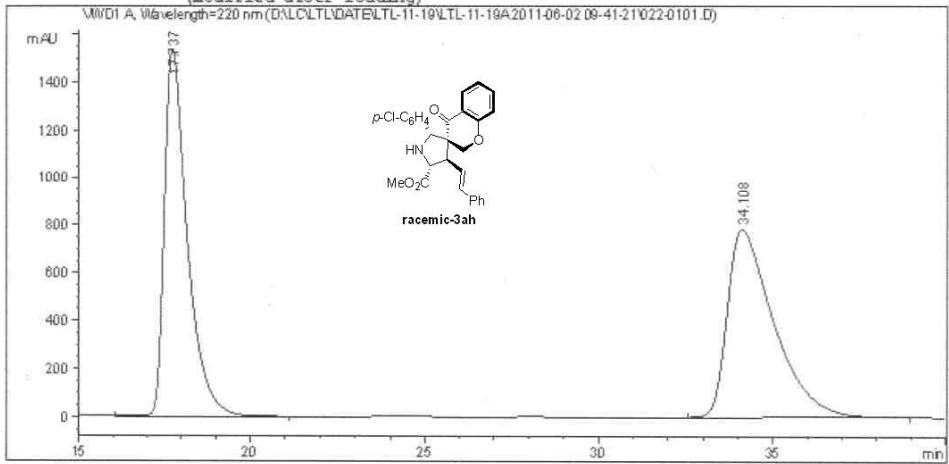

Area Percent Report

Sorted By : Signal  
Multiplier : 1.0000  
Dilution : 1.0000  
Use Multiplier & Dilution Factor with ISTDs

Signal 1: VWD1 A, Wavelength=220 nm

| Peak # | RetTime [min] | Type | Width [min] | Area mAU  | Height [mAU] | Area %  |
|--------|---------------|------|-------------|-----------|--------------|---------|
| 1      | 17.737        | VB   | 0.6916      | 7.16663e4 | 1539.65735   | 49.7176 |
| 2      | 34.108        | EB   | 1.3716      | 7.24803e4 | 782.70056    | 50.2824 |

Totals : 1.44147e5 2322.35791

\*\*\* End of Report \*\*\*

Instrument 1 6/3/2011 4:31:10 PM THL

Data File D:\LC\LTL\DATE\LTL-11-19\LTL-11-19B 2011-06-03 15-22-09\072-0101.D  
Sample Name: LTL-11-19B

=====

|                 |                       |            |           |
|-----------------|-----------------------|------------|-----------|
| Acq. Operator   | : LTL                 | Seq. Line  | : 1       |
| Acq. Instrument | : Instrument 1        | Location   | : Vial 72 |
| Injection Date  | : 6/3/2011 3:23:32 PM | Inj        | : 1       |
|                 |                       | Inj Volume | : 5 µl    |

Acq. Method : D:\LC\LTL\DATE\LTL-11-19\LTL-11-19B 2011-06-03 15-22-09\ADH-30-70-1ML-220NM-40MIN.M

Last changed : 4/22/2011 4:36:32 PM by HZL

Analysis Method : D:\LC\LTL\DATE\LTL-11-19\LTL-11-19B 2011-06-03 15-22-09\072-0101.D\DA.M (ADH-30-70-1ML-220NM-40MIN.M)

Last changed : 6/3/2011 4:30:09 PM by THL  
(modified after loading)

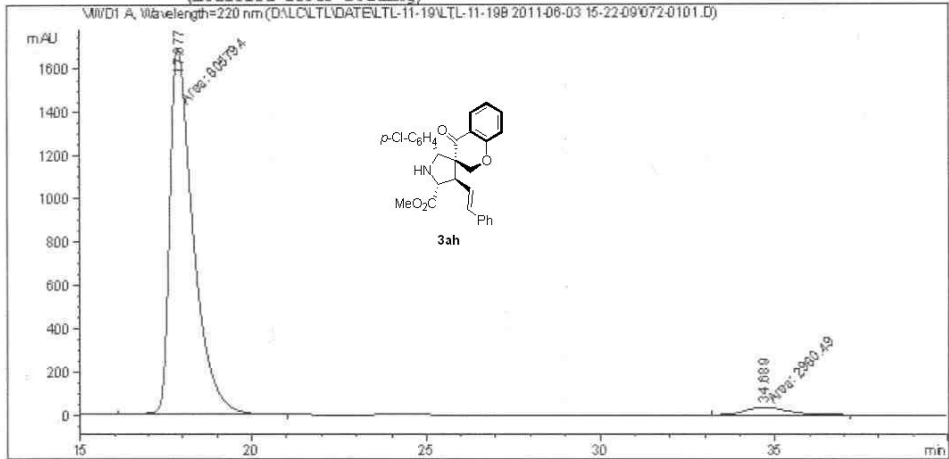

Area Percent Report

Sorted By : Signal  
Multiplier : 1.0000  
Dilution : 1.0000  
Use Multiplier & Dilution Factor with ISTDs

Signal 1: VWD1 A, Wavelength=220 nm

| Peak # | RetTime [min] | Type | Width [min] | Area mAU *s | Height [mAU] | Area %  |
|--------|---------------|------|-------------|-------------|--------------|---------|
| 1      | 17.877        | MM   | 0.7916      | 8.05794e4   | 1696.56726   | 96.4331 |
| 2      | 34.689        | MM   | 1.3949      | 2980.48950  | 35.61176     | 3.5669  |

Totals : 8.35599e4 1732.17902

\*\*\* End of Report \*\*\*

Data File D:\LC\LTL\DATE\LTL-9-36\LTL-9-36A 2011-01-20 10-08-49\075-0201.D  
Sample Name: LTL-9-36A

=====

|                 |                         |            |           |
|-----------------|-------------------------|------------|-----------|
| Acq. Operator   | : THL                   | Seq. Line  | : 2       |
| Acq. Instrument | : Instrument 1          | Location   | : Vial 75 |
| Injection Date  | : 1/20/2011 10:21:18 AM | Inj        | : 1       |
|                 |                         | Inj Volume | : 5 µl    |

Acq. Method : D:\LC\LTL\DATE\LTL-9-36\LTL-9-36A 2011-01-20 10-08-49\ADH-30-70-1ML-220NM-80MIN.M

Last changed : 11/27/2010 11:06:07 AM by LTL

Analysis Method : D:\LC\LTL\DATE\LTL-9-36\LTL-9-36A 2011-01-20 10-08-49\075-0201.D\DA.M (ADH-30-70-1ML-220NM-80MIN.M)

Last changed : 1/24/2011 5:02:35 PM by LTL  
(modified after loading)

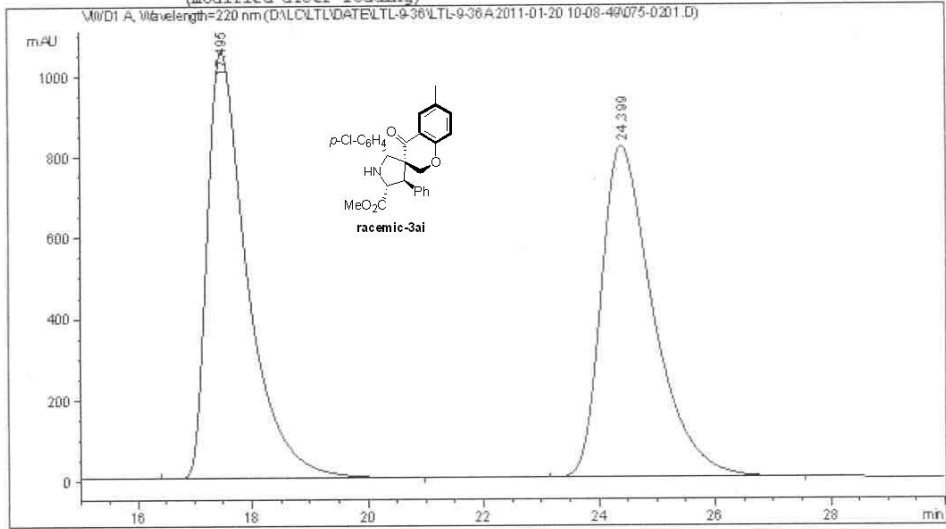

=====  
Area Percent Report  
=====

Sorted By : Signal  
Multiplier : 1.0000  
Dilution : 1.0000  
Use Multiplier & Dilution Factor with ISTDs

Signal 1: WVD1 A, Wavelength=220 nm

| Peak #   | RetTime [min] | Type | Width [min] | Area mAU  | Height [mAU] | Area %  |
|----------|---------------|------|-------------|-----------|--------------|---------|
| 1        | 17.495        | VB   | 0.7189      | 5.09878e4 | 1053.68652   | 50.0661 |
| 2        | 24.399        | EB   | 0.9350      | 5.08531e4 | 819.56921    | 49.9339 |
| Totals : |               |      |             | 1.01841e5 | 1873.25574   |         |

Instrument 1 1/24/2011 5:02:39 PM LTL

Page 1 of 1







Data File D:\LC\LTL\DATE\LTL-9-36-37B\LTL-9-36-37B 2011-01-22 11-00-18\080-0201.D  
Sample Name: LTL-9-37B

=====

|                 |                         |            |           |
|-----------------|-------------------------|------------|-----------|
| Acq. Operator   | : THL-7-95-97           | Seq. Line  | : 2       |
| Acq. Instrument | : Instrument 1          | Location   | : Vial 80 |
| Injection Date  | : 1/22/2011 11:33:18 AM | Inj        | : 1       |
|                 |                         | Inj Volume | : 5 µl    |

Acq. Method : D:\LC\LTL\DATE\LTL-9-36-37B\LTL-9-36-37B 2011-01-22 11-00-18\ADH-30-70-  
1ML-22ONM-30MIN.M

Last changed : 1/22/2011 10:59:12 AM by THL-7-95-97

Analysis Method : D:\LC\LTL\DATE\LTL-9-36-37B\LTL-9-36-37B 2011-01-22 11-00-18\080-0201.D\  
DA.M (ADH-30-70-1ML-22ONM-30MIN.M)

Last changed : 1/24/2011 4:58:15 PM by LTL  
(modified after loading)

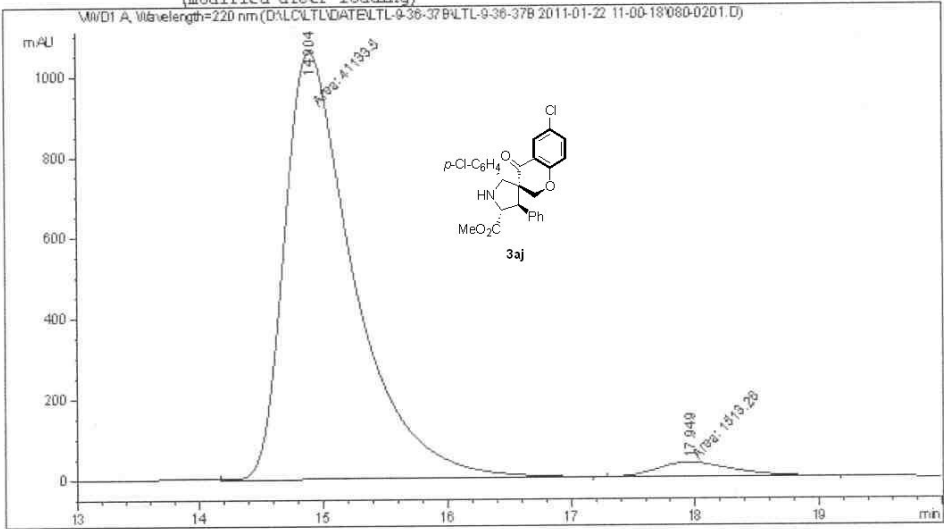

=====  
Area Percent Report  
=====

Sorted By : Signal  
Multiplier : 1.0000  
Dilution : 1.0000  
Use Multiplier & Dilution Factor with ISTDs

Signal 1: VWD1 A, Wavelength=220 nm

| Peak # | RetTime [min] | Type | Width [min] | Area mAU   | Height [mAU] | Area %  |
|--------|---------------|------|-------------|------------|--------------|---------|
| 1      | 14.904        | MM   | 0.6476      | 4.11335e4  | 1058.60535   | 96.4516 |
| 2      | 17.949        | MM   | 0.7012      | 1513.26123 | 35.96942     | 3.5484  |

Totals : 4.26467e4 1094.57477

Instrument 1 1/24/2011 4:58:18 PM LTL

Page 1 of 1



Data File D:\LC\LTL\DATE\LTL-9-40\LTL-9-40A 2011-01-21 12-51-05\067-0101.D  
Sample Name: LTL-9-40A

=====

|                 |                         |            |           |
|-----------------|-------------------------|------------|-----------|
| Acq. Operator   | : THL-7-95-97           | Seq. Line  | : 1       |
| Acq. Instrument | : Instrument 1          | Location   | : Vial 67 |
| Injection Date  | : 1/21/2011 12:52:36 PM | Inj        | : 1       |
|                 |                         | Inj Volume | : 5 µl    |

Acq. Method : D:\LC\LTL\DATE\LTL-9-40\LTL-9-40A 2011-01-21 12-51-05\ADH-30-70-IML-220NM-80MIN.M

Last changed : 11/27/2010 11:06:07 AM by LTL

Analysis Method: D:\LC\LTL\DATE\LTL-9-40\LTL-9-40A 2011-01-21 12-51-05\067-0101.D\DA.M (ADH-30-70-IML-220NM-80MIN.M)

Last changed : 1/24/2011 5:05:26 PM by LTL  
(modified after loading)

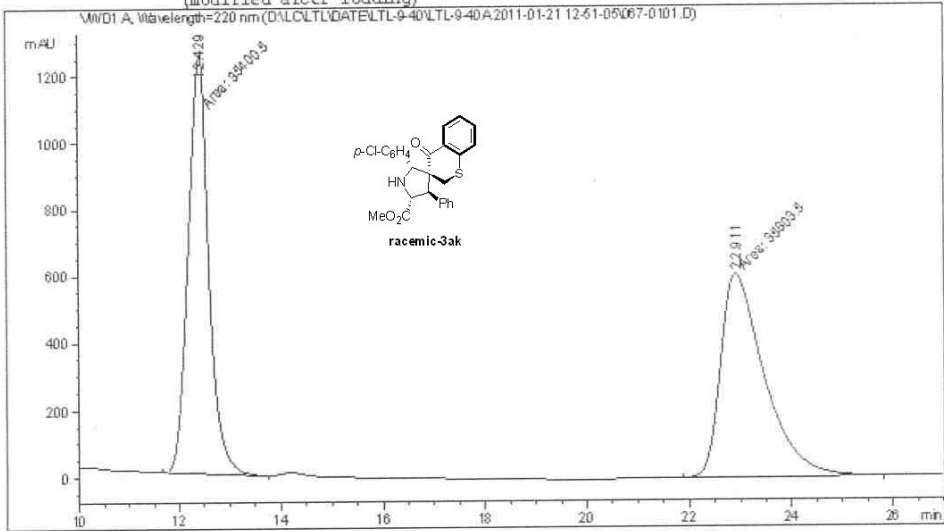

Area Percent Report

Sorted By : Signal  
Multiplier : 1.0000  
Dilution : 1.0000  
Use Multiplier & Dilution Factor with ISTDs

Signal 1: VM01 A, Wavelength=220 nm

| Peak #   | RetTime [min] | Type | Width [min] | Area mAU  | Height [mAU] | Area %  |
|----------|---------------|------|-------------|-----------|--------------|---------|
| 1        | 12.429        | MM   | 0.4706      | 3.54005e4 | 1253.84875   | 49.7170 |
| 2        | 22.911        | MM   | 0.9849      | 3.58035e4 | 605.87762    | 50.2830 |
| Totals : |               |      |             | 7.12040e4 | 1859.72638   |         |

Instrument 1 1/24/2011 5:05:30 PM LTL

Page 1 of 1

Data File D:\LC\LTL\DATE\LTL-9-36-37B\LTL-9-36-37B 2011-01-22 11-00-18\079-0301.D  
Sample Name: LTL-9-40B

=====

|                 |                         |            |           |
|-----------------|-------------------------|------------|-----------|
| Acq. Operator   | : THL-7-95-97           | Seq. Line  | : 3       |
| Acq. Instrument | : Instrument 1          | Location   | : Vial 79 |
| Injection Date  | : 1/22/2011 12:04:54 PM | Inj        | : 1       |
|                 |                         | Inj Volume | : 5 µl    |

Acq. Method : D:\LC\LTL\DATE\LTL-9-36-37B\LTL-9-36-37B 2011-01-22 11-00-18\ADH-30-70-  
IML-220NM-30MIN.M

Last changed : 1/22/2011 10:59:12 AM by THL-7-95-97

Analysis Method : D:\LC\LTL\DATE\LTL-9-36-37B\LTL-9-36-37B 2011-01-22 11-00-18\079-0301.D\  
DA.M (ADH-30-70-IML-220NM-30MIN.M)

Last changed : 1/24/2011 4:58:58 PM by LTL  
(modified after loading)

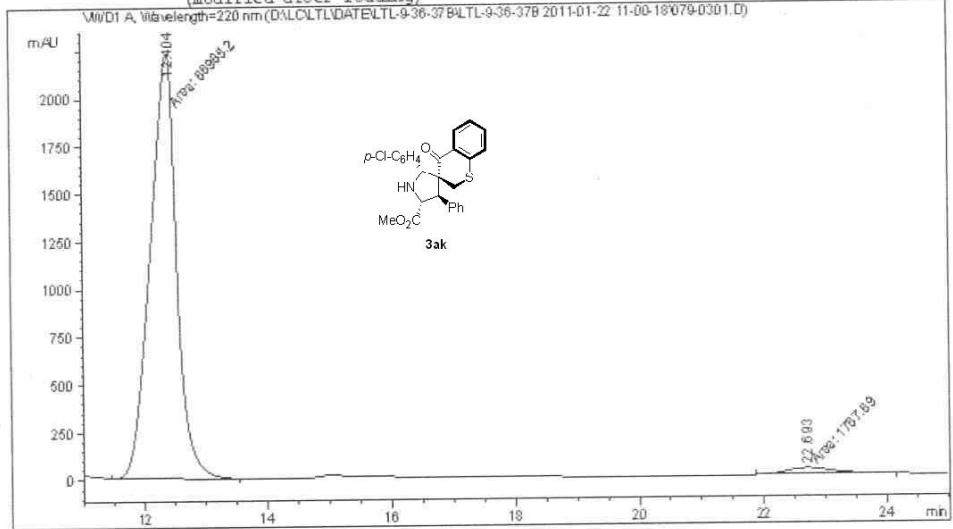

=====  
Area Percent Report  
=====

Sorted By : Signal  
Multiplier : 1.0000  
Dilution : 1.0000  
Use Multiplier & Dilution Factor with ISTDs

Signal 1: VWD1 A, Wavelength=220 nm

| Peak #   | RetTime [min] | Type | Width [min] | Area mAU *s | Height [mAU] | Area %  |
|----------|---------------|------|-------------|-------------|--------------|---------|
| 1        | 12.404        | MM   | 0.5008      | 6.69852e4   | 2229.08105   | 97.4289 |
| 2        | 22.693        | MM   | 0.8975      | 1767.69250  | 32.82574     | 2.5711  |
| Totals : |               |      |             | 6.87529e4   | 2261.90680   |         |
